# Supplementary material for: C. elegans monitor energy status to trigger innate immune responses via AMPK pathway against bacterial pathogens
Source: Research Square preprint supplement (doi:10.21203/rs.3.rs-590514/v1), 2021-06-10
Supplement: Supplementary file 1 [file 20c50edf11c976c7d32fbd1c.docx]

**Supplementary Material for**

**“*C. elegans* monitor energy status to trigger innate immune responses via AMPK pathway against bacterial pathogens ”**

Shouyong Ju#, 1, Hanqiao Chen#, 1, Shaoying Wang1, Jian Lin1, Raffi V Aroian2, Donghai Peng*, 1, Ming Sun*, 1

1. State Key Laboratory of Agricultural Microbiology, College of Life Science and Technology, Huazhong Agricultural University, Wuhan, China.

2. Program in Molecular Medicine, University of Massachusetts Medical School Worcester, Worcester, USA.

# These authors contributed equally to this work.

*To whom correspondence: Tel: 86-27-87283455; Fax: 86-27-87280670; E-mail: m98sun@ mail.hzau.edu.cn & donghaipeng@mail.hzau.edu.cn

**Supplementary Figures:**

**Figure S1. Nematocidal Bt strains cause energy disturbance in *C. elegans*.** *C. elegans* N2 were fed with nematocidal *B. thuringiensis* BMB171/Cry5Ca, BMB171/Cry21Aa, BMB171/Cry6Aa, and a non-nematocidal *B. thuringiensis* BMB171/Cry1Ac. The AMP/ATP ratio were then analyzed by LC-MS/MS. The mean and SD of three independent replicates are shown. Values differences were calculated by one-way ANOVA. Triple asterisks (∗∗∗) are set at *p*< 0.001, two asterisks (∗∗) are set at *p*< 0.01. a single asterisk (∗) is set at *p*<0.05.


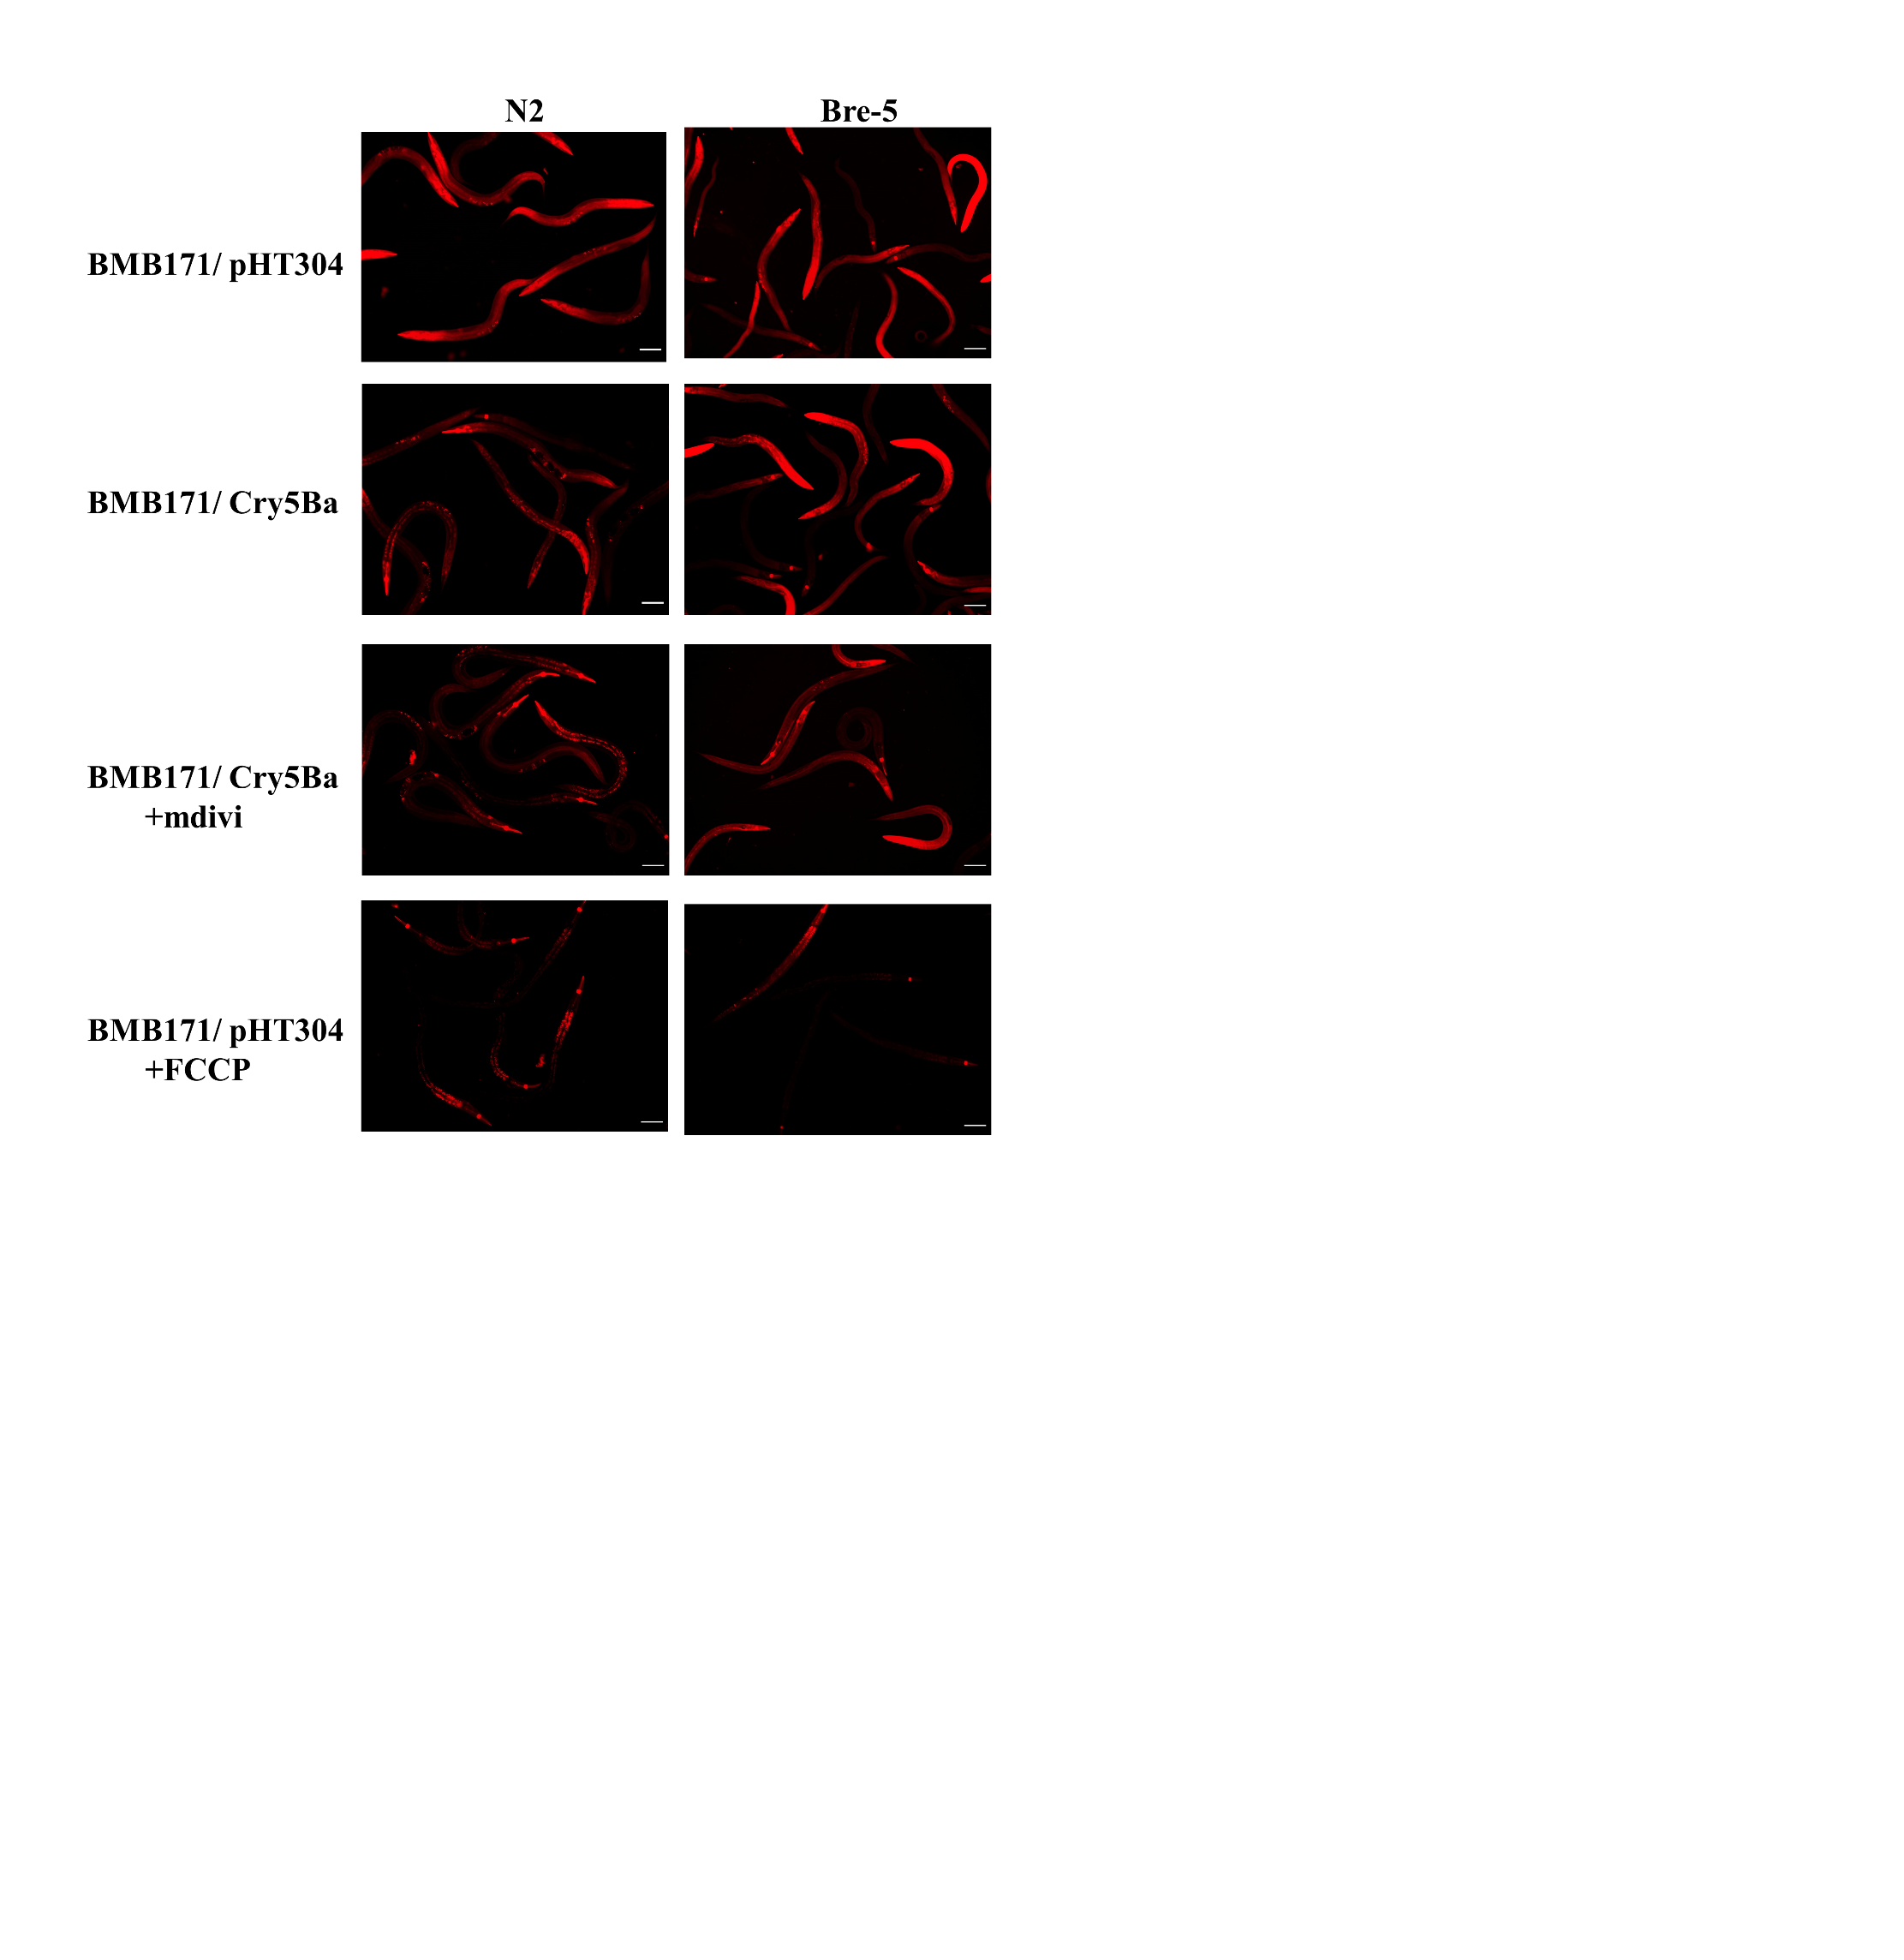


**Figure S2. BMB171 / Cry5Ba infection reduces the** **mitochondrial membrane potential (****ΔΨm) of *C. elegans*.** *C. elegans* N2 and *bre-5* were fed BMB171 / pHT304 and BMB171 / Cry5Ba respectively. Mdivi were used to inhibit mitochondrial MF and FCCP was used as a positive control to reduce mitochondrial membrane potential. Treated animals were incubated in TMRE and observed microscopically. The scan bars represent 100 μm.


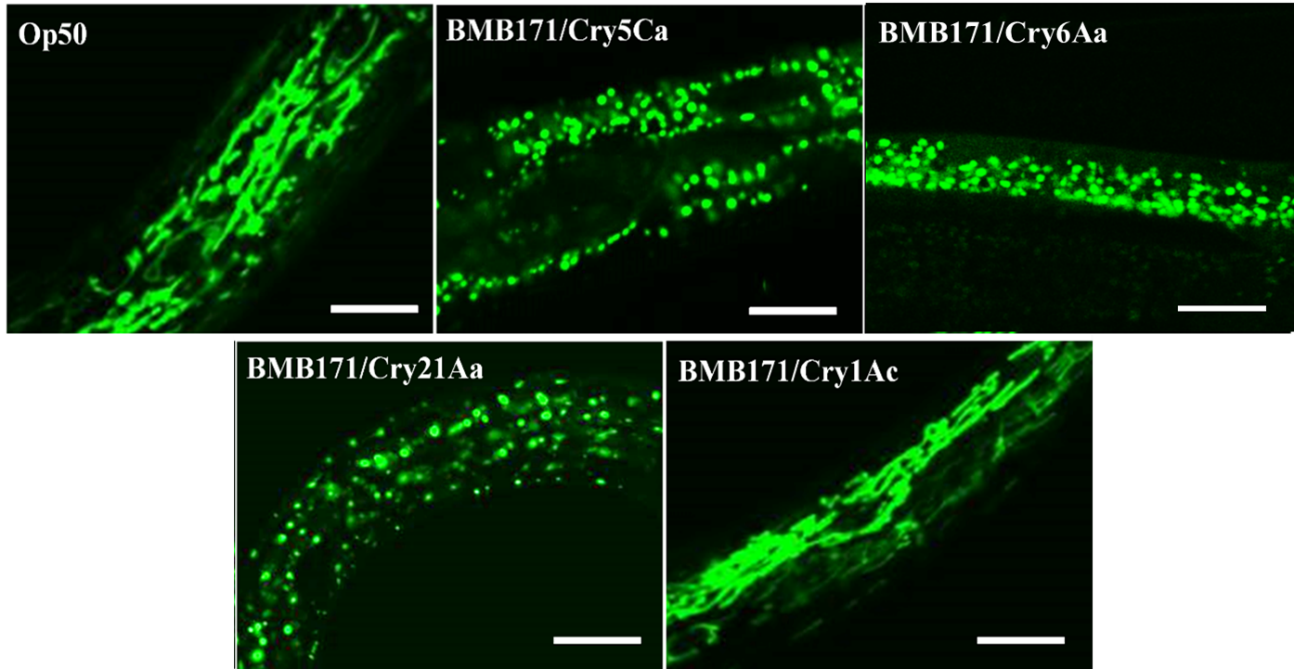


**Figure S3.** **Nematocidal Bt strains that produce Cry5-like Cry proteins cause MF phenomenon in *C. elegans*.** The transgenic *C. elegans* SJ4143(*zcIs17* [P*ges-1*::GFPmt]) were fed with nematocidal *B. thuringiensis* BMB171/Cry5Ca, BMB171/Cry21Aa, BMB171/Cry6Aa, and a Non-nematocidal *B. thuringiensis* BMB171/Cry1Ac. The mitochondria morphologies of transgenic *C. elegans* were observed after 4 h of treatment. More than 60 worms were observed for each treatment and the representative images are shown. These strains are the recombinant *B. thuringiensis* which producing Cry5Ca, Cry21Aa, Cry6Aa, and Cry1Ac proteins in the acrystalliferous *B. thuringiensis* strain BMB171 respectively. The *E. coli* strain OP50 was used as negative control. The scan bars represent 20 μm.

**Figure S4. Analysis of the percentage of worms that showed MF phenotype after treatment with different strains.** More than 60 worms were observed for each treatment. The mean and SD of three independent replicates are shown. Values differences were calculated by one-way ANOVA. ∗∗∗*p*< 0.001 versus control (OP50).


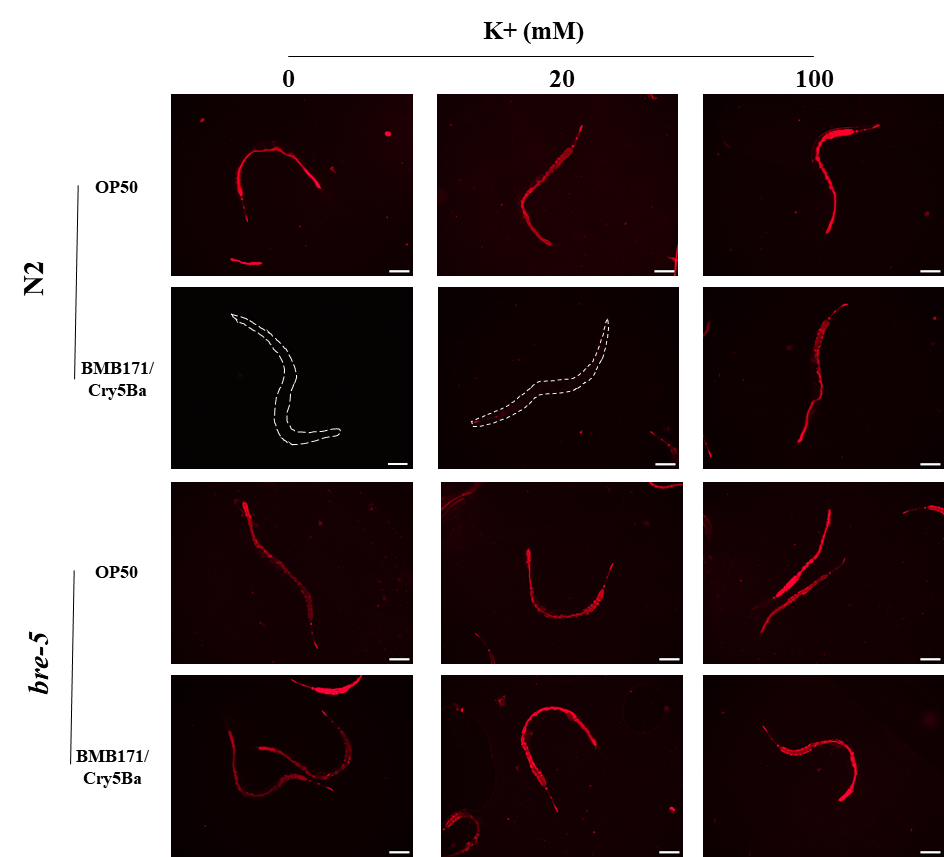


**Figure S5.** **Visual observation the** **potassium concentration during BMB171/Cry5Ba infection.** *C. elegans* N2 and *bre-5* (*ye17*) were fed with OP50 or BMB171/Cry5Ba during different potassium environment. Fluorescence microscopy was used to monitor potassium concentration by measuring cytoplasmic fluorescence using the APG-2 AM. The representative images of worms treated by each strain are shown. Scale bar, 100 μm.


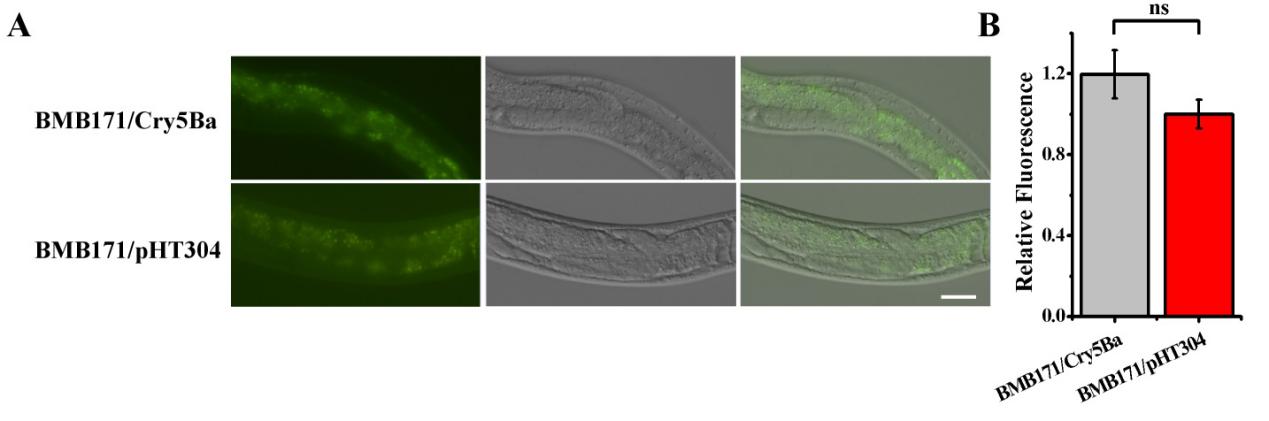


**Figure S6. Visual observation the cytoplasm calcium concentration after BMB171/Cry5Ba infection in *C. elegans*.** Fluorescence microscopy was used to monitor calcium concentration by measuring cytoplasmic fluorescence using the calcium indicator Fluo-4 AM. The below part shows the quantification of the fluorescence levels. These results are the mean ± SD of three independent experiments. Scale bar, 0.02 mm.

**Figure S7. The transcription levels of *aak-2* after Bt infection.** QRT-PCR to detect the transcription levels of *aak-2* of wild type N2 worms when fed with BMB171/Cry5Ba and BMB171/pHT304. Values differences were calculated by one-way ANOVA. One asterisk (∗) is set at *p*<0.05. Two asterisks (∗∗) are set at *p*<0.01.

**
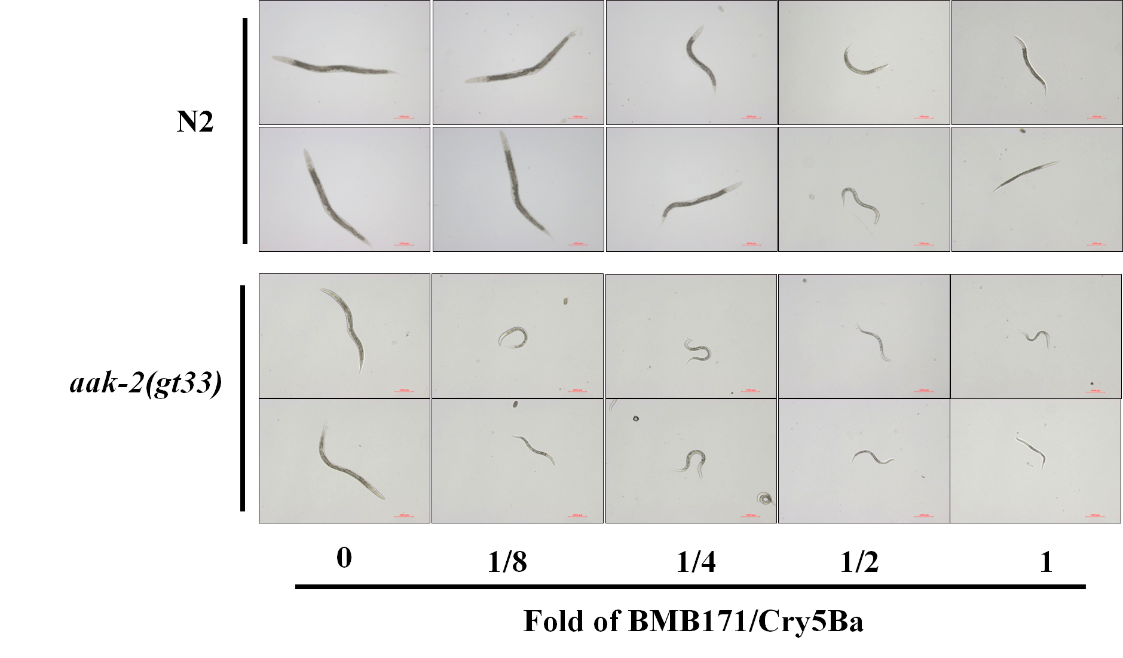
**

**Figure S8. The plates assay revealed *aak-2* mutant *aak-2 (gt33)* worms are more sensitive to BMB171/Cry5B infection.** The growth assay of the wild type N2 and mutant worms after BMB171/Cry5Ba infection. A total of 100-200 L1-staged worms were exposed to each dose of BMB171/Cry5Ba in plates for 3 days. The experiment was performed at least three independent replicates and the representative worms are shown for each dose. Scale bar, 0.02 mm.


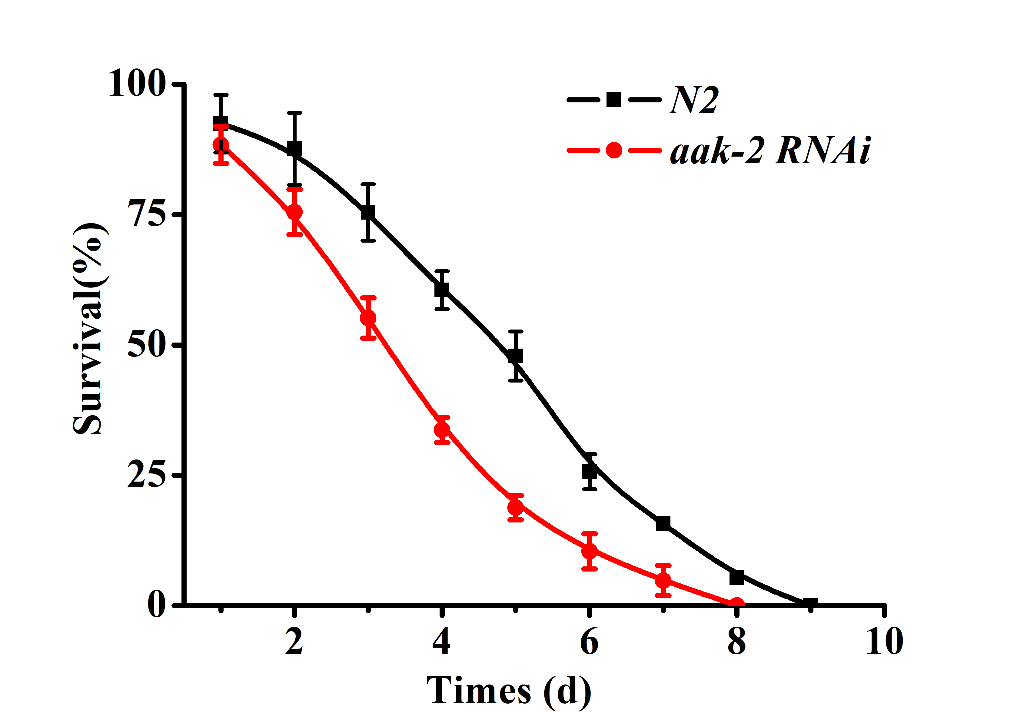


**Figure S9. A mortality assay revealed *aak-2* RNAi worms are more hypersensitive to BMB171/Cry5B infection.** The survival rate of the wild type worm N2 with empty vector and *aak-2* RNAi wormsexposed to BMB171/Cry5Ba at different times were recorded. A total of 30~50 L4 stage synchronized worms were scored for survival per replicate. The mean and SD of three independent replicates are shown. *p*<0.01 relative to N2 control with empty vector (pL4440).


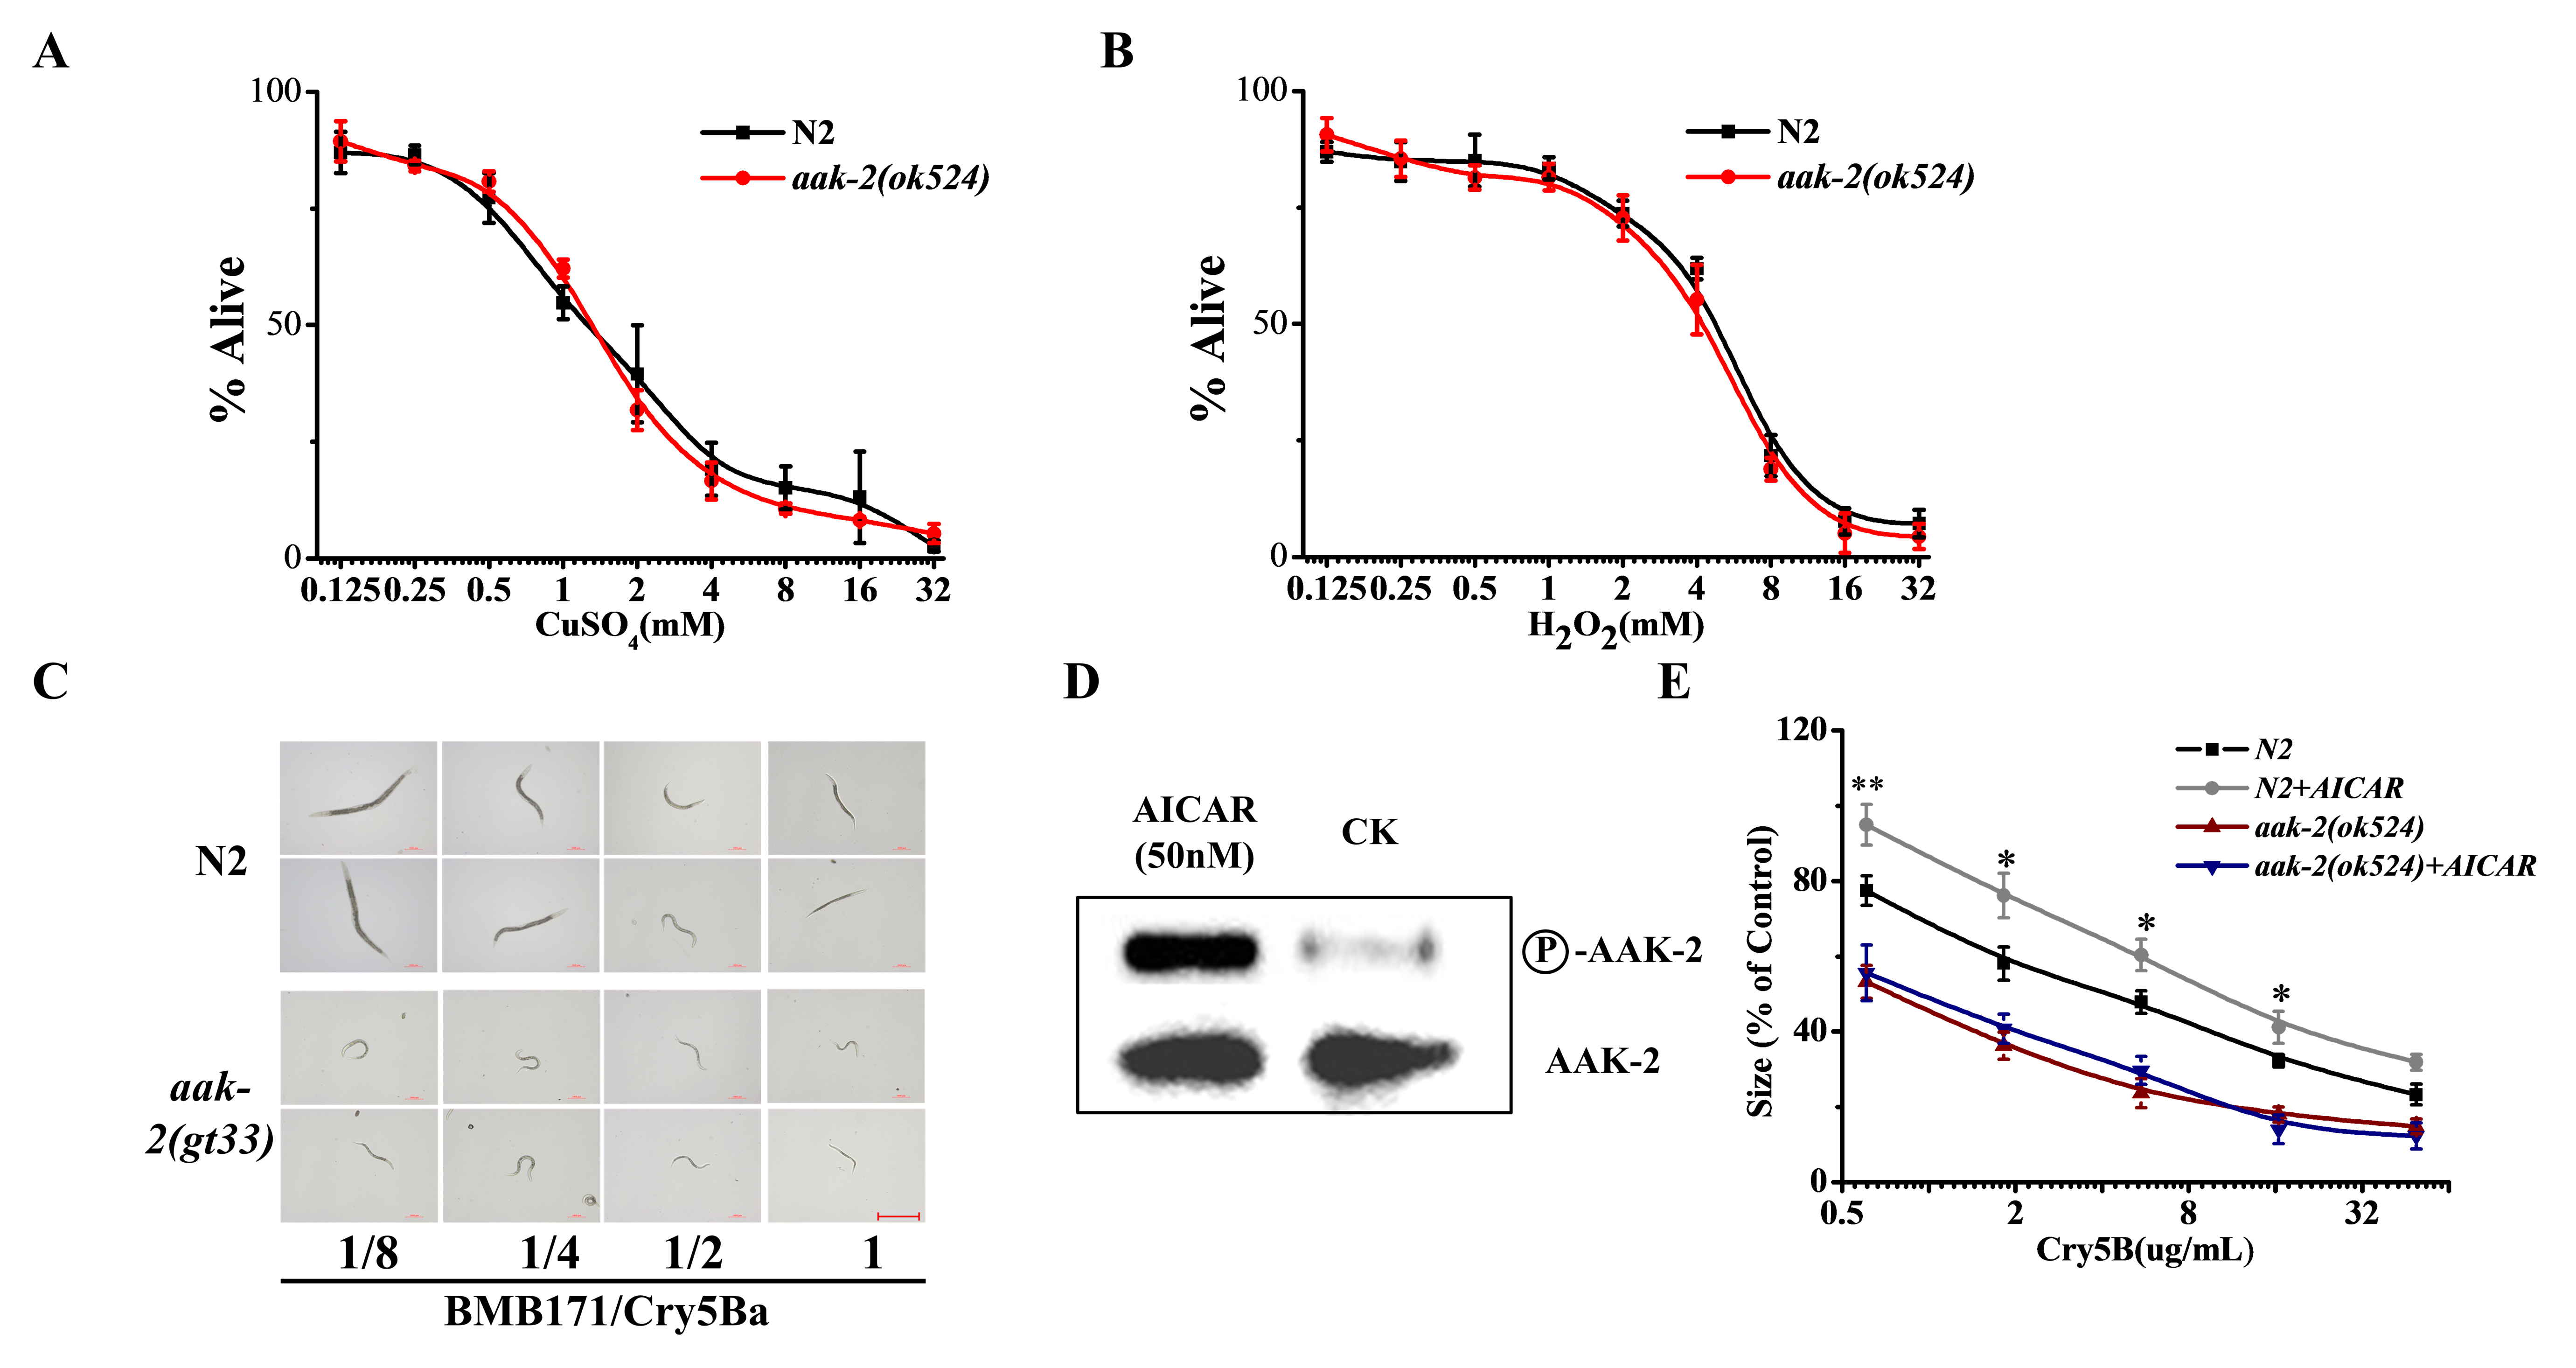


**Figure S110. A dose-dependent mortality assay revealed aak-2 mutants are not hypersensitive to chemical toxins insult compared to wild-type N2.** (A) The survival assay of the wild worm N2 and null allele *aak-2* mutant *aak-2 (ok524)* in different doses of heavy metal CuSO4. (B) The survival assay of the wild worm N2 and null allele *aak-2* mutant *aak-2 (ok524)* in different doses of oxidative stress agent H2O2. A total of 20~30 L4 stage synchronized worms were scored for mortality per replicate. The mortality was determined after 3 days for Bt strains or CuSO4 exposure, and 4 h for H2O2 exposure. Data present the mean and SD of three independent experiments. No significant difference was relative to N2 control.


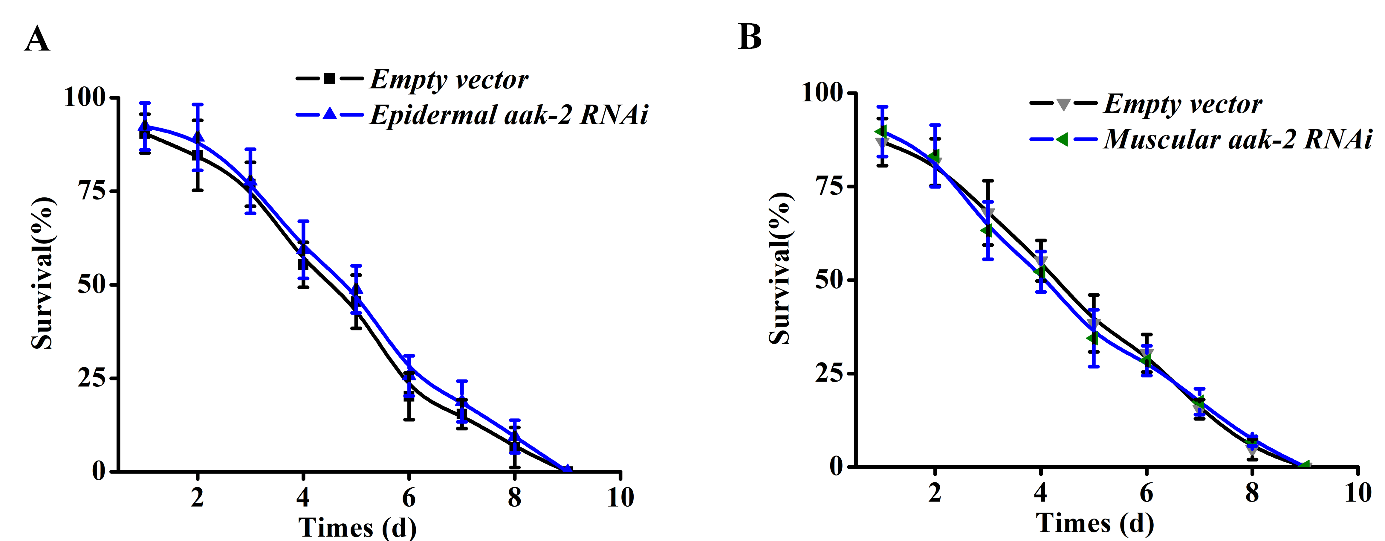


**Figure S11. Mortality assay revealed epidermal- (A) or muscular-specific (B) *aak-2* RNAi had no effect on worm’s sensitivity to Bt infection**. The survival assay of the wild worm N2 and RNAi worms exposed to BMB171/Cry5Ba at different times were recorded. A total of 20~30 L4 stage synchronized worms were scored for mortality per replicate. Data present the mean and SD of three independent experiments. No significant difference was relative to empty vector controls.

**
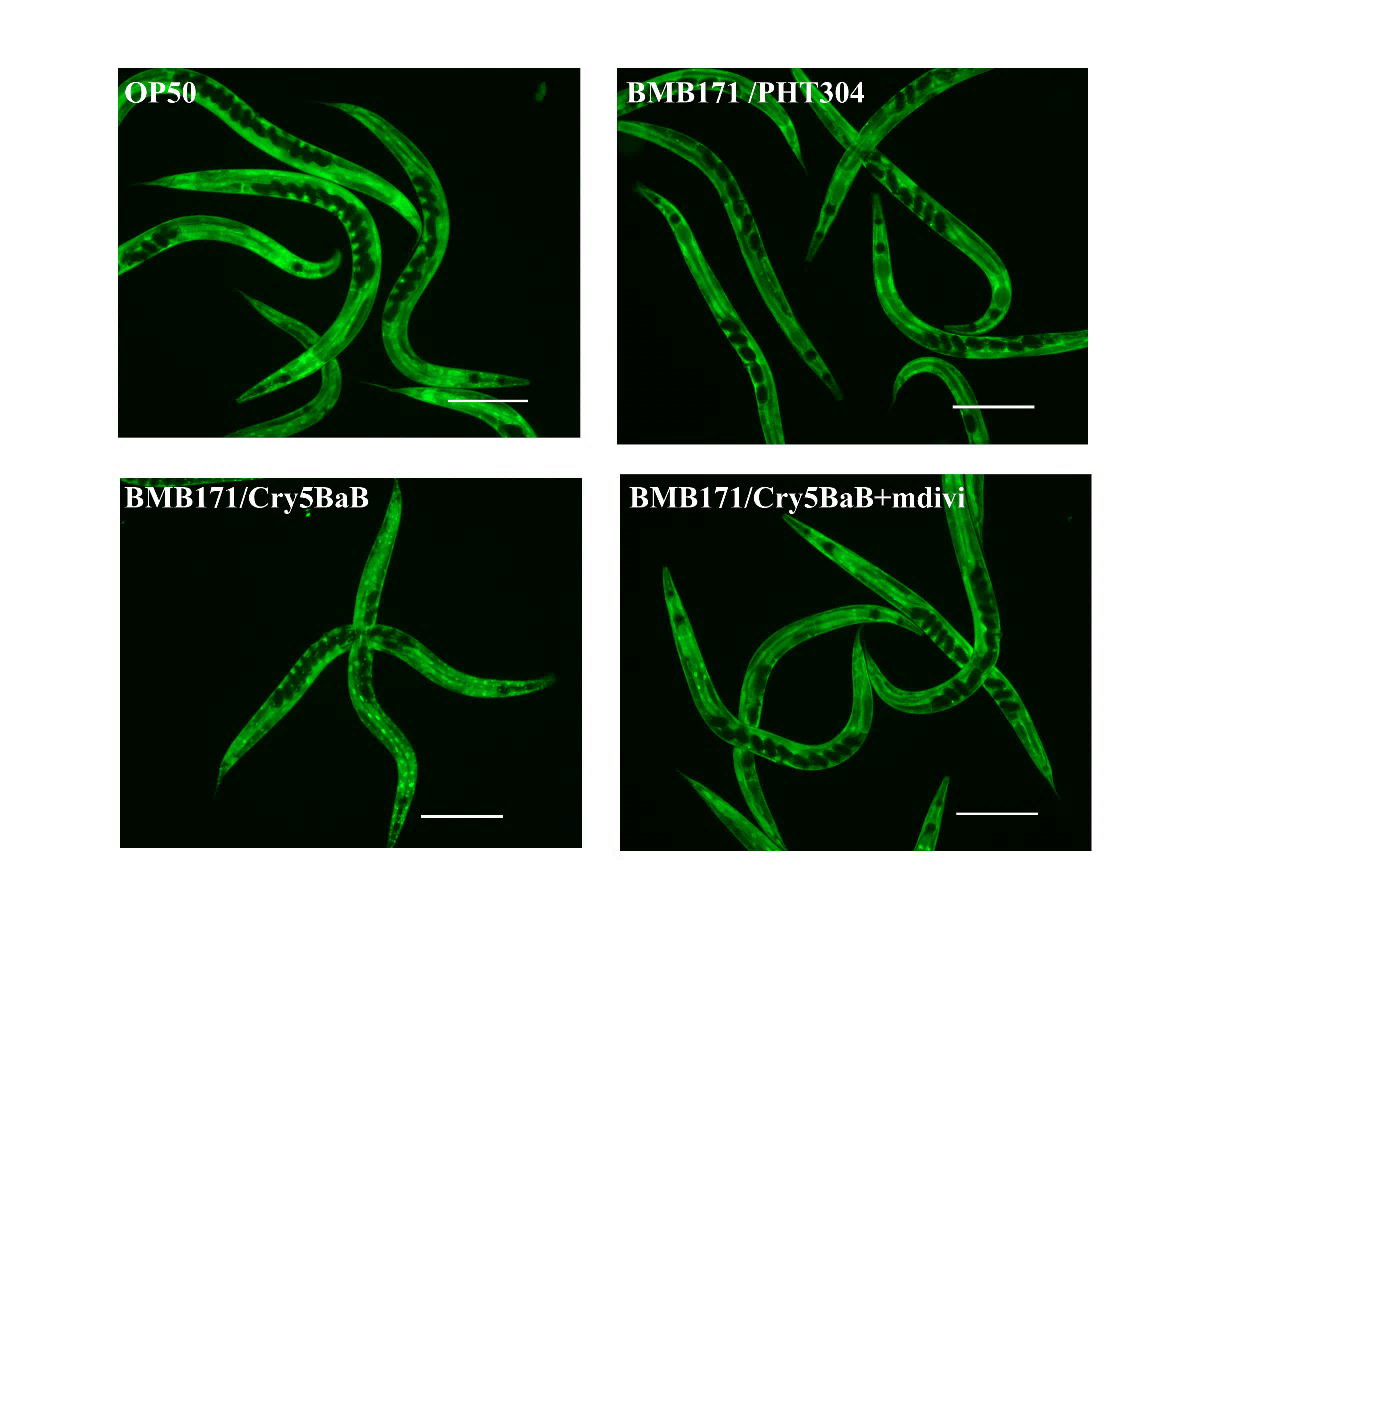
**

**Figure S12. Mdivi-1 can significantly suppress DAF-16 nuclear translocation.** DAF-16 translocation was observed using the transgenic worms TJ356*(Isdaf-16*::*gfp*) as a reporter. The transgenic worms were fed with OP50, BMB171/Cry5Ba, BMB171/pHT304 or BMB171/Cry5Ba mixed mdivi for 2 h, respectively. The DAF-16::GFP expression pattern was observed using fluorescent microscope (Olympus BX31, Japan) at 40×magnification. Each experiment repeated at least three times and the representative images for each treatment are shown. Scale bar, 20 µm.


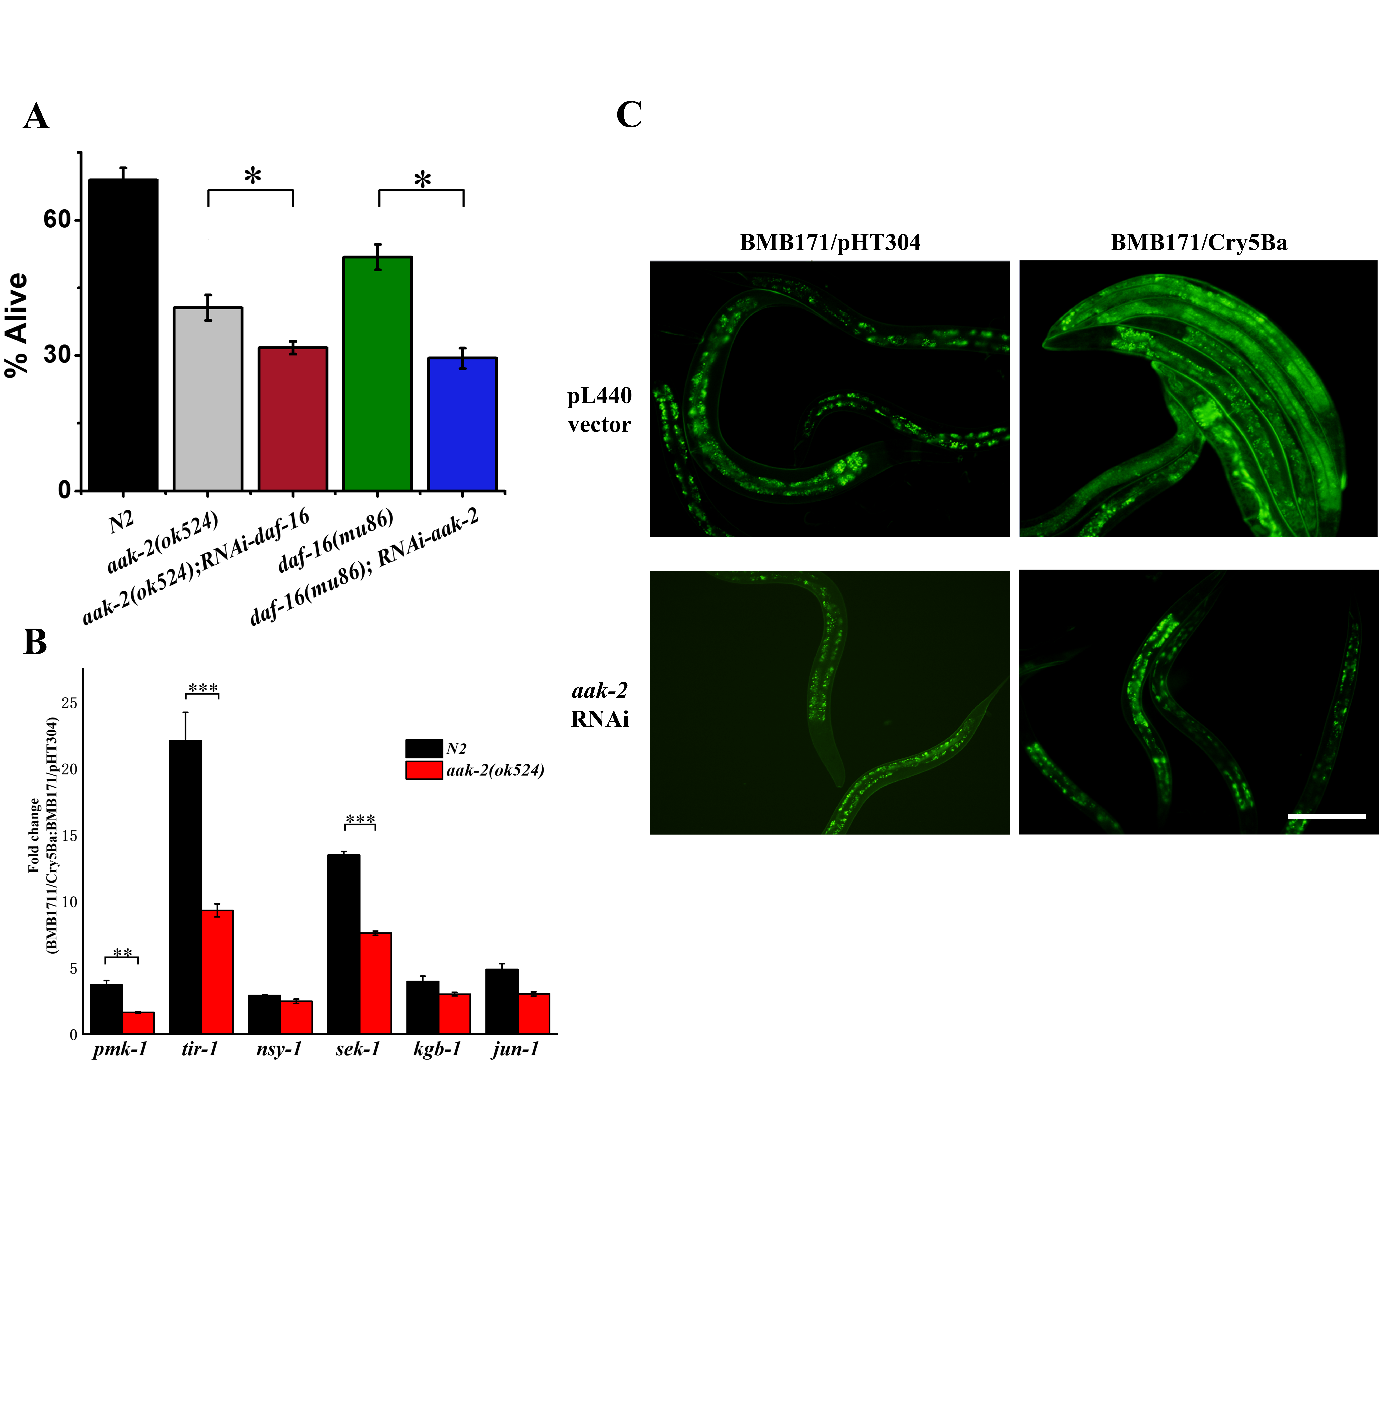


**Figure S13. The innate immunity p38 MAPK pathway was triggered via AMPK when** ***C. elegans* fed with BMB171/Cry5Ba.** (A) The alive rates of the wild worm N2, null allele *aak-2* mutant *aak-2 (ok524),* *aak-2(ok524)/**RNAi-**daf-16*(reduced the transcription levels of *daf-16* gene in *aak-2* mutant *aak-2 (ok524)),* null allele *daf-16* mutant *daf-16(mu86)* and *daf-16(mu86)/RNAi-aak-2* (reduced the transcription levels of *aak-2* gene in *daf-16* mutant *daf-16(mu86)*)when fed with BMB171/Cry5Ba for 12 hours. (B) The transcription levels of MAPK genes *pmk-1, tir-1, nsy-1, sek-1, kgb-1* and *jun-1* of wild type N2 worms and null allele *aak-2* mutant *aak-2 (ok524)* when fed with BMB171/Cry5Ba and BMB171/pHT304. (C) The PMK-1 expression of transgene worms PRJ112 [*pmk1::gfp*] fed with BMB171/Cry5Ba and BMB171/pHT304 were observed using fluorescent microscope; when gene *aak-2* was silenced by RNA interference (RNAi) technique in transgene worms PRJ112 [*pmk1::gfp*], the PMK-1 expression of the PRJ112 [*pmk-1::gfp*] worms fed with BMB171/Cry5Ba and BMB171/pHT304. The numbers of worms n≥60. The scale bar is 0.02 mm.

**Supplementary Tables:**

**Table S1. Transcriptome analysis of *C. elegans* after infection of Bt strains.** This table was submitted directly as an Excel file (designated Table S1) because it contains a large amount of data that cannot be easily shown in a Word file.

**Table S2. Enrichment pathway analyses of C. elegans after infection of Bt strains.** This table was submitted directly as an Excel file (designated Table S1) because it contains a large amount of data that cannot be easily shown in a Word file.

**Table S3. Transcriptome analysis of the genes of responsed to nematocidal Bt infection.** This table was submitted directly as an Excel file (designated Table S1) because it contains a large amount of data that cannot be easily shown in a Word file.

**Table S4. Strains and plasmids used in this study.**

| **Strains or plasmids** | **Characteristics** | **Source or reference** |
| --- | --- | --- |
| ***Bacillus thuringiensis*** | | |
| BMB171 | No plasmid mutant, acrystalliferous Bt strain | 1 |
| BMB171/pHT304 | Derivative of BMB171 containing empty plasmid pHT304 as a control. | Our laboratory |
| BMB171/Cry5Ba | Derivative of BMB171 containing cry5Ba gene for producing Cry5Ba. | 2 |
| BMB171/Cry5Ca | Derivative strain of BMB171 containing cry5Ca gene expressing Cry5Ca protein. | 3 |
| BMB171/Cry6Aa | Derivative strain of BMB171 containing cry6Aa gene expressing Cry6Aa protein. | 2 |
| BMB171/Cry21Aa | Derivative strain of BMB171 containing cry21A gene expressing Cry21A protein. | 4 |
| BMB171/Cry1Ac | Derivative of BMB171 containing cry1Ac gene for producing Cry1Ac. | 5 |
| ***Escherichia coli*** | | |
| OP50 | An uracil auxotroph strain whose growth is limited on Nematode Growth Medium (NGM) plates | *Caenorhabditis* Genetics Center |
| HT115 | An RNAi feeding strain with tetracycline resistance used for nematode interference experiments. | Professor Wu Zhengxin |
| HT115/pL440 | E. coli HT115 containing empty plasmid pL440. | This study |
| HT115/bre-5 | E. coli HT115 cloned target gene of *bre-5* as a RNAi strain. | This study |
| HT115/aak-2 | E. coli HT115 cloned target gene of *aak-2* as a RNAi strain. | This study |
| HT115/daf-16 | E. coli HT115 cloned target gene of *daf-16* as a RNAi strain. | This study |
| ***Caenorhabditis elegans* strains** | | |
| N2 | wild type strains | *Caenorhabditis* Genetics Center |
| HY498 | *bre-5*(*ye17*), which was deleted the membrane receptor of Cry5Ba, showing resistance to Cry5Ba. | *Caenorhabditis* Genetics Center |
| SJ4143 | *zcIs17*(P*ges-1*::GFPmt), which stably expressed GFP in mitochondria matrix of intestinal cells. | *Caenorhabditis* Genetics Center |
| tm1944 | *aak-1*(*tm1944*), which was the null alleles mutant of AMPK subunit α1. | *Caenorhabditis* Genetics Center |
| [RB754](https://cgc.umn.edu/strain/RB754) | aak-2(ok524), which was the null alleles mutant of AMPK subunit α2. | *Caenorhabditis* Genetics Center |
| tm2658 | aakb-1(tm2658), which was the null alleles mutant of AMPK subunit β1. | *Caenorhabditis* Genetics Center |
| tm5269 | aakg-4(tm5269), which was the null alleles mutant of AMPK subunit γ1. | *Caenorhabditis* Genetics Center |
| TG38 | aak-2(gt33), which was the null allele mutant of *aak-2*. | *Caenorhabditis* Genetics Center |
| CF1038 | *daf-16*(*mu86*), which was the null allele mutant of *daf-16*. | *Caenorhabditis* Genetics Center |
| PRJ112 | *mutEx70*(pmk1::gfp), which expressed GFP by fusing GFP on PMK, working as PMK-1 reporter worm. | *Caenorhabditis* Genetics Center |
| TJ356 | *zIs356*(*Isdaf-16:: gfp*), which expressed GFP by fusing GFP on Daf-16, working as Daf-16 reporter worm. | *Caenorhabditis* Genetics Center |
| CF1553 | *muIs84*(sod-3::GFP), which expressed GFP by fusing GFP on Sod-3, working as Sod-3 reporter worm. | *Caenorhabditis* Genetics Center |
| RT311 | *pwIs69*(Pvha-6::GFP::RAB-11), which stably expressed GFP in apical recycling endosome. | *Caenorhabditis* Genetics Center |
| - | *aak-2*(*ok524*) (P*vha-6*::*aak-2*), which was a rescued worm that stably expressed *aak-2* in the intestine. | This study |
| - | *aak-2(ok524)* (P*myo-3*::*aak-2*), which was a rescued worm that stably expressed *aak-2* in the muscle. | This study |
| - | *aak-2(ok524)* (P*rab-3*::*aak-*2), which was a rescued worm that stably expressed *aak-2* in the neuron. | This study |
|  | *aak-2(ok524)* (P*aak-2*::*aak-*2), which was the native rescued worm that stably expressed *aak-2*. | This study |
| **Plasmid** | | |
| pHT304 | *E. coil* to *B. thuringiensis* shuttle vector with 4 copies per cell, Ampr, Ermr, 6.6 kb. | 6 |
| pL440 | Vector used for the expression of dsRNA for RNAi in nematodes. | Andrew Fire (Addgene plasmid # 1654) |
| pPD49.26 | Vector for overexpression of cloned tissue-specific promoter. | Andrew Fire (Addgene plasmid # 1686) |

**Table S5. Primer sequences used in this study.**

| **Primers** | **Sequence (5'→3')** | **Functions** |
| --- | --- | --- |
| mtDNA Forward | GTTTATGCTGCTGTAGCGTG | To quantify the content of mtDNA. |
| mtDNA Reverse | CTGTTAAAGCAAGTGGACGAG | To quantify the content of mtDNA. |
| *ama-1 Forward* | TGGAACTCTGGAGTCACACC | To quantify the content of genomic DNA. |
| *ama-1 Reverse* | CATCCTCCTTCATTGAACGG | To quantify the content of genomic DNA. |
| Pvha-6 Forward | CCCAAGCTTTCGACGGCCCGGGCTGGTAAAG | To amplify the upstream of the *vha-6* promoter. |
| Pvha-6 Reverse | CGCGGATCCTTTGGCGGAGGGACTCAGATGG | To amplify the downstream of the *vha-6* promoter. |
| Pmyo-3 Forward | CCCAAGCTTGGGCTGCAGGTCGGCTATAATA | To amplify the upstream of the *myo-3* promoter. |
| Pmyo-3 Reverse | CGCGGATCCTCTAGATGGATCTAGTGGTCGT | To amplify the downstream of the *myo-3* promoter. |
| Prab-3 Forward | CCCAAGCTTAGTCTTTTAAACAAAAACCCAAA | To amplify the upstream of the *rab-3* promoter. |
| Prab-3 Reverse | CGCGGATCCTGTGAAATCCGATAGGCAAG | To amplify the downstream of the *rab-3* promoter. |
| Paak-2 Forward | CCCAAGCTTTAAGGTTTCCGACACGCTCG | To amplify the upstream of the *aak-2* promoter. |
| Paak-2 Reverse | CGCGGATCCTGAAACAGTATATGCGTTTTAT | To amplify the downstream of the *aak-2* promoter. |
| F-aak-2 Forward | GGATCCATGTTTTCTCATCAAGATCG | To amplify the upstream of the full-length of *aak-2*. |
| F-aak-2 Reverse | TTAACGAGCCAGTGTTCCAATC | To amplify the downstream of the full-length of *aak-2*. |
| U-aak-2 Forward | AGTCATTTTGTATGCACTTCT | To amplify the upstream including the 3-UTR of *aak-2* by overlap PCR. |
| U-aak-2 Reverse | GGATCCTGGATCTTTCTGAATTTGTTTT | To amplify the downstream including the 3-UTR of *aak-2* by overlap PCR. |
| *tba-1 Forward* | TCAACATGCCATCGCCGCC | To analysis the transcription of *tab-1* mRNA in *C. elegans.* |
| *tba-1 Reverse* | TCCAAGCGAGCCAGGCTTCAG | To analysis the transcription of *tab-1* mRNA in *C. elegans.* |
| *lys-7 Forward* | AGGTTCCCCCGATTGTTGAC | To analysis the transcription of *lys-7* mRNA in *C. elegans.* |
| *lys-7 Reverse* | GCTGGGTTGTATGCACGAAC | To analysis the transcription of *lys-7* mRNA in *C. elegans.* |
| *F32A5.4 Forward* | CAGAGCGAGTTGGCCACTTA | To analysis the transcription of *F32A5.4* mRNA in *C. elegans.* |
| *F32A5.4 Reverse* | CATTTTGCAGCCACCACACA | To analysis the transcription of *F32A5.4* mRNA in *C. elegans.* |
| *tre-4 Forward* | GGCCAACACTTTGCATTGGT | To analysis the transcription of *tre-4* mRNA in *C. elegans.* |
| *tre-4 Reverse* | GGTCGTCCTCGTCGTTTTCT | To analysis the transcription of *tre-4* mRNA in *C. elegans.* |
| *sod-3 Forward* | AAATGTCCGCCCAGACTATG | To analysis the transcription of *sod-3* mRNA in *C. elegans.* |
| *sod-3 Reverse* | TGGCAAATCTCTCGCTGA | To analysis the transcription of *sod-3* mRNA in *C. elegans.* |
| *clec-166 Forward* | GCGCTAATCCAGAGGTCTCC | To analysis the transcription of *clec-166* mRNA in *C. elegans* |
| *clec-166 Reverse* | CCCGTATTCGCTACTGGACC | To analysis the transcription of *clec-166* mRNA in *C. elegans* |
| *thn-2 Forward* | GAGGCTTCCAACTTACGGCT | To analysis the transcription of *thn-2* mRNA in *C. elegans* |
| *thn-2 Reverse* | CAAGGGATGCTGGTGGAACT | To analysis the transcription of *thn-2* mRNA in *C. elegans* |
| *D1086.3 Forward* | TGCAGGGATGGCAGAAGTTT | To analysis the transcription of *D1086.3* mRNA in *C. elegans* |
| *D1086.3 Reverse* | GGAATGGGTACTCAACCGGA | To analysis the transcription of *D1086.3* mRNA in *C. elegans* |
| *ttr-44 Forward* | TCCAGAAAACGCCGTCATCA | To analysis the transcription of *ttr-44* mRNA in *C. elegans* |
| *ttr-44 Reverse* | TGAGTAAGCAGTGGCAAAAGG | To analysis the transcription of *ttr-44* mRNA in *C. elegans* |
| *pmk-1 Forward* | TGCCCGTCGTACATATCGTG | To analysis the transcription of *pmk-1* mRNA in *C. elegans* |
| *pmk-1 Reverse* | GGTCATCGTTGAGTCGCTGA | To analysis the transcription of *pmk-1* mRNA in *C. elegans* |
| *tir-1 Forward* | TCCACTTGGACGAACTGACG | To analysis the transcription of *tir-1* mRNA in *C. elegans* |
| *tir-1 Reverse* | GCTGGCTGAGTAGGACAAGG | To analysis the transcription of *tir-1* mRNA in *C. elegans* |
| *nsy-1 Forward* | TGCTTGCGTGTAGAACTTTTCA | To analysis the transcription of *nsy-1* mRNA in *C. elegans* |
| *nsy-1 Reverse* | TGATGATTCGGATGTGTGTGAGT | To analysis the transcription of *nsy-1* mRNA in *C. elegans* |
| *sek-1 Forward* | GACACTGTTTGGCGACGATG | To analysis the transcription of *sek-1* mRNA in *C. elegans* |
| *sek-1 Reverse* | ATTCCGTCCACGTTGCTGAT | To analysis the transcription of *sek-1* mRNA in *C. elegans* |
| *kgb-1 Forward* | ATGGAAGTGGATCTGCCGGT | To analysis the transcription of *kgb-1* mRNA in *C. elegans* |
| *kgb-1 Reverse* | AGGTCATCGGCCATTACGAC | To analysis the transcription of *kgb-1* mRNA in *C. elegans* |
| *jun-1 Forward* | CAAAAAGGATCGGCGACAGG | To analysis the transcription of *jun-1* mRNA in *C. elegans* |
| *jun-1 Reverse* | AGATGCCGGTGTGATTGGAC | To analysis the transcription of *jun-1* mRNA in *C. elegans* |

**Supporting References:**

1 He, J. *et al.* Complete genome sequence of *Bacillus thuringiensis* mutant strain BMB171. *Journal of bacteriology* **192**, 4074-4075, doi:10.1128/JB.00562-10 (2010).

2 Guo, S. *et al.* New strategy for isolating novel nematicidal crystal protein genes from Bacillus thuringiensis strain YBT-1518. *Applied and environmental microbiology* **74**, 6997-7001, doi:10.1128/AEM.01346-08 (2008).

3 Geng, C. *et al.* Dissimilar Crystal Proteins Cry5Ca1 and Cry5Da1 Synergistically Act against Meloidogyne incognita and Delay Cry5Ba-Based Nematode Resistance. *Appl. Environ. Microbiol.* **83**, doi:UNSP e03505.10.1128/AEM.03505-16 (2017).

4 Wan, L. *et al.* Bacillus thuringiensis targets the host intestinal epithelial junctions for successful infection of Caenorhabditis elegans. *Environ Microbiol* **21**, 1086-1098, doi:10.1111/1462-2920.14528 (2019).

5 Fang, S. *et al.* Bacillus thuringiensis bel protein enhances the toxicity of Cry1Ac protein to Helicoverpa armigera larvae by degrading insect intestinal mucin. *Applied and environmental microbiology* **75**, 5237-5243, doi:10.1128/AEM.00532-09 (2009).

6 Arantes, O. & Lereclus, D. Construction of cloning vectors for Bacillus thuringiensis. *Gene* **108**, 115-119 (1991).
