# Supplementary material for: C. elegans monitor energy status to trigger innate immune responses via AMPK pathway against bacterial pathogens
Source: Research Square preprint supplement (doi:10.21203/rs.3.rs-590514/v1), 2021-06-10
Supplement: Supplementary file 2 [file 6c8e6ffe0f848161e34133dc.xlsx]

## Sheet: Ctrl4vsKO4.DiffExpGeneFilter.an
Gene Information				Expression		Regulation		Significance
GeneID	GeneName	Description	Locus	BMB171/Cry5Ba	BMB171/pHT304	log2(BMB171/Cry5Ba：BMB171/pHT304)	Regulation	p_value	q_value
gene10618	clec-6	C-type LECtin	NC_003281.10:4885696-4887442	0.919978	0	-	up	5e-05	0.00110206
gene36914	cutl-18	CUTiclin-Like	NC_003283.11:11313456-11316880	12.7984	0.56154	4.51043	up	0.00195	0.0181441
gene13285	pig-1	Maternal embryonic leucine zipper kinase	NC_003282.8:507057-519456	20.6114	64.4778	-1.64536	down	0.00105	0.0117915
gene37668	T07F10.3	Uncharacterized protein	NC_003283.11:12868294-12870032	42.6386	101.472	-1.25085	down	0.00755	0.0434243
gene44618	ifa-1	Intermediate filament protein ifa-1	NC_003284.9:11271247-11275343	108.671	25.3825	2.09807	up	5e-05	0.00110206
gene10421	R07E5.15	Uncharacterized protein	NC_003281.10:4401523-4402440	75.0965	21.2399	1.82197	up	0.00755	0.0434243
gene37093	nlp-24	Neuropeptide-Like Protein	NC_003283.11:11616376-11616695	6892.95	1181.44	2.54457	up	0.0025	0.0211243
gene2774	Y106G6G.4	Uncharacterized protein	NC_003279.8:10321784-10323252	107.368	34.6077	1.6334	up	0.0027	0.0221472
gene40507	mdt-17	Mediator of RNA polymerase II transcription subunit 17	NC_003283.11:20251968-20267229	49.6149	109.273	-1.13909	down	0.00885	0.0475476
gene4575	Y57G7A.6	Uncharacterized protein	NC_003280.10:1282008-1285514	28.6034	9.57038	1.57954	up	0.0061	0.03806
gene4696	fbxb-49	F-box B protein	NC_003280.10:1568519-1569563	0	4.04757	-	down	5e-05	0.00110206
gene3302	R06C1.4	Uncharacterized protein	NC_003279.8:11930806-11931635	1653.39	376.803	2.13354	up	0.00845	0.0466398
gene2335	chaf-1	CHromatin Assembly Factor	NC_003279.8:9077886-9080011	45.0391	105.331	-1.22568	down	0.00595	0.037463
gene1421	T09B4.5	Uncharacterized protein	NC_003279.8:6154140-6156794	8.17269	170.936	-4.3865	down	0.00085	0.0100071
gene3636	acox-4	Acyl-coenzyme A oxidase	NC_003279.8:12951139-12953928	25.5914	0.404423	5.98365	up	0.00255	0.0213614
gene4729	fbxb-27	-	NC_003280.10:1646596-1647568	0	1.51557	-	down	0.00025	0.00406508
gene1510	ZC308.4	Uncharacterized protein	NC_003279.8:6368305-6369496	31.8474	244.082	-2.93812	down	5e-05	0.00110206
gene19271	R09E10.6	Uncharacterized protein	NC_003282.8:10293036-10294085	402.919	128.06	1.65367	up	0.0006	0.00788238
gene20324	scl-5	SCP-Like extracellular protein	NC_003282.8:13064019-13065108	13.9012	70.7747	-2.34802	down	0.00545	0.0354057
gene6892	Y9D1A.2	Uncharacterized protein	NC_003280.10:7450510-7451378	0	3.69786	-	down	0.0004	0.00586466
gene36186	aqp-4	AQuaPorin or aquaglyceroporin related	NC_003283.11:9737650-9739581	53.3973	7.18113	2.89448	up	0.00115	0.0125072
gene34097	C49G7.7	Uncharacterized protein	NC_003283.11:4034558-4035957	2.30493	40.4666	-4.13394	down	0.00205	0.018779
gene8532	Y17G7B.17	Uncharacterized protein	NC_003280.10:12092688-12099916	46.0864	129.885	-1.49482	down	0.0025	0.0211243
gene37980	F35E12.6	Uncharacterized protein	NC_003283.11:13734383-13736151	300.615	77.8549	1.94906	up	5e-05	0.00110206
gene16905	K08B4.2	Uncharacterized protein	NC_003282.8:6075300-6076157	0	38.5108	-	down	5e-05	0.00110206
gene40964	pfn-3	Profilin-3	NC_003284.9:1079545-1080625	320.471	53.7616	2.57555	up	0.0023	0.0202726
gene44265	sex-1	Steroid hormone receptor family member cnr14	NC_003284.9:10201621-10205421	8.7391	44.2589	-2.34041	down	0.00055	0.00740175
gene41735	ZK813.2	Uncharacterized protein	NC_003284.9:3443825-3444191	288.063	1665.03	-2.53109	down	0.00015	0.0027619
gene9554	F23H11.4	Uncharacterized protein	NC_003281.10:902422-907529	23.5324	56.1784	-1.25537	down	0.0047	0.0320293
gene40132	asp-17	ASpartyl Protease	NC_003283.11:19035752-19037318	12.3589	88.9801	-2.84793	down	5e-05	0.00110206
gene45610	F28H6.4	Uncharacterized protein	NC_003284.9:14127880-14133314	4.51504	19.4802	-2.1092	down	0.00125	0.0133406
gene2781	ZC434.3	Uncharacterized protein	NC_003279.8:10334773-10335706	71.6646	2.31344	4.95315	up	0.0017	0.0164851
gene8518	mcm-2	yeast MCM (licensing factor) related	NC_003280.10:12001672-12006608	45.4451	151.625	-1.73831	down	0.0001	0.00197766
gene32996	C14C6.3	Uncharacterized protein	NC_003283.11:543468-545359	20.6254	0	-	up	5e-05	0.00110206
gene45108	adt-1	ADAMTS family	NC_003284.9:12679151-12689183	10.1494	1.57865	2.68462	up	0.00095	0.0109508
gene11597	grp-1	GTP exchange factor for ARFs 1	NC_003281.10:8085750-8088059	38.6193	104.561	-1.43695	down	0.0048	0.0324039
gene18027	C42D4.2	Uncharacterized protein	NC_003282.8:7180565-7182785	10.1678	1.76625	2.52524	up	0.0068	0.0406502
gene35231	C13A2.9	Uncharacterized protein	NC_003283.11:7262584-7264087	2.98607	0	-	up	5e-05	0.00110206
gene34760	Y38A10A.2	Uncharacterized protein	NC_003283.11:6057575-6063425	13.7445	0.902385	3.92897	up	0.00225	0.0200561
gene6752	C15F1.1	Uncharacterized protein	NC_003280.10:6988777-6991582	51.5652	11.3543	2.18316	up	0.0013	0.0137063
gene3486	bgnt-1.8	B3GNT1, Beta-1,3-N-acetylGucosamiNylTransferase 1, homolog	NC_003279.8:12444586-12446468	1.0402	0	-	up	5e-05	0.00110206
gene3944	gadr-6	Uncharacterized protein	NC_003279.8:14078278-14082347	3.26842	13.576	-2.0544	down	0.0046	0.0315165
gene35061	col-142	COLlagen	NC_003283.11:6831185-6832212	258.401	121.44	1.08938	up	0.00865	0.0470843
gene5182	Y110A2AR.1	Receptor expression-enhancing protein	NC_003280.10:2919779-2920647	88.5593	275.746	-1.63863	down	0.0021	0.0190682
gene20340	rfc-3	RFC (DNA replication factor) family	NC_003282.8:13095768-13096938	88.6585	272.692	-1.62094	down	0.0006	0.00788238
gene33045	F31F4.17	Uncharacterized protein	NC_003283.11:658475-660310	2.93147	0	-	up	5e-05	0.00110206
gene19137	C47E12.2	Uncharacterized protein	NC_003282.8:10002164-10003337	62.4133	147.677	-1.24252	down	0.0087	0.0470932
gene7976	ZK666.4	Uncharacterized protein	NC_003280.10:10477258-10477693	0	2.8457	-	down	0.00135	0.0140456
gene9482	T19C3.2	Uncharacterized protein	NC_003281.10:614706-617407	216.411	3.40375	5.99051	up	0.00115	0.0125072
gene33863	C17B7.3	Uncharacterized protein	NC_003283.11:3342803-3343865	0	2.61137	-	down	5e-05	0.00110206
gene677	2018-09-01	SEParase	NC_003279.8:3433299-3438533	34.7684	80.2639	-1.20697	down	0.00435	0.0304721
gene11106	T26A5.8	Uncharacterized protein	NC_003281.10:6462336-6462847	86.8339	318.024	-1.87281	down	0.004	0.028838
gene33008	K06H6.4	Uncharacterized protein	NC_003283.11:579282-581372	6.7543	0	-	up	5e-05	0.00110206
gene13575	Y41D4B.4	Uncharacterized protein	NC_003282.8:1660114-1669480	18.3433	44.4382	-1.27655	down	0.00815	0.0456538
gene39123	F57G8.5	Uncharacterized protein	NC_003283.11:16339064-16341473	11.4218	2.48551	2.20017	up	0.00805	0.0453237
gene340	Y51F10.15	Uncharacterized protein	NC_003279.8:1945813-1949520	0	2.98135	-	down	0.0069	0.0409522
gene10355	R74.2	Uncharacterized protein	NC_003281.10:4188254-4189154	88.1912	2.53361	5.12137	up	0.00715	0.0418212
gene8086	M106.2	Uncharacterized protein	NC_003280.10:10844529-10849999	33.522	94.8476	-1.5005	down	0.0022	0.0197487
gene34830	sago-1	Piwi-like protein	NC_003283.11:6303798-6307935	38.5708	15.4169	1.323	up	0.00645	0.0395579
gene5405	skpo-2	ShK domain and PerOxidase domain containing protein	NC_003280.10:3431574-3436459	14.6054	1.23888	3.55939	up	0.0008	0.00954063
gene41285	T24C12.4	Uncharacterized protein	NC_003284.9:2204240-2205063	36.4717	2.25429	4.01603	up	0.00545	0.0354058
gene198	spd-1	Uncharacterized protein	NC_003279.8:1030828-1033435	32.7324	89.9159	-1.45786	down	0.00275	0.0224019
gene19664	F54E12.2	Uncharacterized protein	NC_003282.8:11333241-11336863	57.1773	133.326	-1.22144	down	0.0044	0.0306795
gene3510	pri-2	DNA primase large subunit	NC_003279.8:12528389-12532127	37.2307	108.794	-1.54703	down	0.00045	0.00637744
gene6625	rpy-1	43 kDa receptor-associated protein of the synapse homolog	NC_003280.10:6702495-6705493	17.5461	3.4994	2.32597	up	0.00465	0.0317539
gene41053	cebp-1	C/EBP (CCAAT/enhancer-binding protein) homolog	NC_003284.9:1452800-1453858	23.27	93.9909	-2.01405	down	0.0007	0.00881148
gene37049	sdz-8	SKN-1 Dependent Zygotic transcript	NC_003283.11:11515152-11516178	21.7718	2.17847	3.32108	up	0.0058	0.0368834
gene39054	F11A5.17	Uncharacterized protein	NC_003283.11:16202045-16202740	0	0.948209	-	down	0.00655	0.0399345
gene3257	F35E2.2	Uncharacterized protein	NC_003279.8:11736636-11737699	0	1.54603	-	down	5e-05	0.00110206
gene4979	ZK1240.6	Uncharacterized protein	NC_003280.10:2322413-2322907	0	1.05033	-	down	0.0087	0.0470932
gene34711	M03F8.1	Uncharacterized protein	NC_003283.11:5951434-5953766	37.0076	2.24167	4.04518	up	0.0017	0.0164851
gene9136	kbp-3	Kinetochore-binding protein 3	NC_003280.10:14389297-14390065	151.296	476.303	-1.65451	down	0.00355	0.0267227
gene8447	hda-5	Histone DeAcetylase	NC_003280.10:11799036-11802356	25.9357	6.70627	1.95136	up	0.0076	0.0436209
gene14329	ZK180.6	Uncharacterized protein	NC_003282.8:4520375-4524888	208.377	5.21949	5.31915	up	5e-05	0.00110206
gene32936	lipl-5	Non-coding transcript of protein-coding gene lipl-5	NC_003283.11:385751-387696	953.84	201.942	2.2398	up	5e-05	0.00110206
gene17153	C49A9.10	Uncharacterized protein	NC_003282.8:6205884-6206329	156.52	603.01	-1.94583	down	0.00845	0.0466398
gene7733	wee-1.3	Membrane-associated tyrosine-and threonine-specific cdc2-inhibitory kinase wee-1.3	NC_003280.10:9714101-9716462	67.8897	158.296	-1.22136	down	0.00385	0.0280498
gene6428	F13H8.5	Uncharacterized protein	NC_003280.10:6252992-6256026	75.9037	2.91085	4.70466	up	5e-05	0.00110206
gene37727	F15B9.8	Uncharacterized protein	NC_003283.11:12988560-12992044	369.711	43.3457	3.09244	up	0.0002	0.00345935
gene42761	T13C5.10	Uncharacterized protein	NC_003284.9:6188147-6189422	1.53436	0	-	up	0.00235	0.0203769
gene35991	ptr-1	PaTched Related family	NC_003283.11:9178043-9181680	32.8887	3.86516	3.08899	up	0.0004	0.00586466
gene20431	Y62E10A.19	Uncharacterized protein	NC_003282.8:13403879-13408162	45.0988	2.70299	4.06046	up	0.00025	0.00406508
gene9632	Y119D3B.13	Uncharacterized protein	NC_003281.10:1182059-1184893	135.83	37.1311	1.8711	up	0.0044	0.0306795
gene17306	hrpf-2	HnRNP F homolog	NC_003282.8:6373596-6376522	49.4305	120.151	-1.28137	down	0.00185	0.0174989
gene28871	skr-10	SKp1 Related (ubiquitin ligase complex component)	NC_003282.8:15946806-15947385	2.8954	89.5357	-4.95063	down	0.00255	0.0213614
gene11844	ZK370.4	Uncharacterized NTE family protein ZK370.4	NC_003281.10:8725592-8731373	51.4317	108.19	-1.07283	down	0.0077	0.0439814
gene1683	asd-2	Uncharacterized protein	NC_003279.8:6877739-6888217	71.7992	22.8565	1.65136	up	0.00215	0.0194369
gene20296	F55G11.3	-	NC_003282.8:12970269-12971974	1.05867	0	-	up	5e-05	0.00110206
gene41241	F49H12.5	Uncharacterized protein	NC_003284.9:2074454-2075727	352.562	36.5892	3.26839	up	5e-05	0.00110206
gene44861	sams-1	Probable S-adenosylmethionine synthase 1	NC_003284.9:11966027-11967393	283.173	92.4667	1.61468	up	0.00135	0.0140456
gene19187	C04G2.3	-	NC_003282.8:10093060-10093511	1545.37	468.15	1.72291	up	0.0002	0.00345935
gene6429	F13H8.11	Uncharacterized protein	NC_003280.10:6257897-6259955	15.5404	3.34425	2.21627	up	0.0078	0.044308
gene43779	F53A9.1	Uncharacterized protein	NC_003284.9:8711594-8711828	588.638	11067.5	-4.23281	down	0.00025	0.00406508
gene40485	fbxa-116	F-box A protein	NC_003283.11:20187709-201up2	2.3737	0	-	up	5e-05	0.00110206
gene33206	tank-1	Tankyrase-like protein	NC_003283.11:1276530-1285684	11.5864	25.2393	-1.12324	down	0.006	0.0376633
gene17705	C01B10.11	Uncharacterized protein	NC_003282.8:6657997-6660244	143.163	58.7928	1.28395	up	0.0091	0.0485597
gene5994	pho-1	Intestinal acid phosphatase	NC_003280.10:5233302-5235832	48.8506	10.5368	2.21293	up	0.0015	0.0151584
gene4241	abu-11	Activated in Blocked Unfolded protein response	NC_003280.10:192591-194534	96.7037	6.01566	4.00678	up	5e-05	0.00110206
gene46467	C06G1.1	Uncharacterized protein	NC_003284.9:16633367-16637212	67.5907	7.01268	3.26879	up	5e-05	0.00110206
gene45966	dhhc-1	Palmitoyltransferase	NC_003284.9:15098187-15100405	14.3499	58.4538	-2.02626	down	0.0059	0.0372758
gene32441	Y116A8C.48	Unclassified non-coding RNA Y116A8C.48	NC_003282.8:17137347-17142989	0	5.3927	-	down	0.00055	0.00740175
gene36094	gsnl-1	Gelsolin-like protein 1	NC_003283.11:9497104-9499273	139.52	15.8785	3.13533	up	5e-05	0.00110206
gene7873	F27E5.9	Uncharacterized protein	NC_003280.10:10134949-10135686	28.3098	459.67	-4.02122	down	0.0007	0.00881148
gene36147	col-147	COLlagen	NC_003283.11:9632321-9633326	609.708	44.9164	3.7628	up	5e-05	0.00110206
gene11863	K02D10.8	Uncharacterized protein	NC_003281.10:8786407-8787093	0	72.7133	-	down	0.00655	0.0399345
gene39559	Y20C6A.1	Uncharacterized protein	NC_003283.11:17371604-17376703	4.39295	0.458344	3.26069	up	0.00355	0.0267227
gene45870	F31F6.3	Uncharacterized protein	NC_003284.9:14871835-14872861	2.21934	19.2236	-3.11467	down	0.0062	0.0384809
gene10940	zmp-1	Zinc MetalloProtease	NC_003281.10:5927025-5932911	3.57762	23.2318	-2.69903	down	0.0005	0.00687417
gene32928	atg-9	AuTophaGy (yeast Atg homolog)	NC_003283.11:349384-358835	25.564	88.512	-1.79176	down	0.0056	0.0359988
gene45967	mlt-9	Uncharacterized protein	NC_003284.9:15102099-15107741	62.7673	2.55477	4.61874	up	0.0004	0.00586466
gene45732	gcsh-1	Glycine Cleavage System H protein	NC_003284.9:14514191-14515071	158.073	33.6377	2.23245	up	0.0059	0.0372758
gene3736	M01E5.4	Uncharacterized protein	NC_003279.8:13287955-13289540	56.6549	149.449	-1.39938	down	0.0061	0.03806
gene34194	mcm-7	DNA helicase	NC_003283.11:4347197-4349544	46.4066	240.718	-2.37494	down	5e-05	0.00110206
gene19059	ssq-1	Sperm-Specific family, class Q	NC_003282.8:9852588-9853558	334.582	93.8212	1.83437	up	0.00025	0.00406508
gene36089	K06A4.8	-	NC_003283.11:9482180-9483182	16.8287	2.62825	2.67875	up	0.00865	0.0470843
gene37984	cld-9	Cub (CUB) Like Domain containing protein	NC_003283.11:13749237-13751891	19.4034	144.136	-2.89305	down	5e-05	0.00110206
gene39134	F13A7.1	Major sperm protein	NC_003283.11:16376308-16377901	62.4685	19.7021	1.66478	up	0.0085	0.0467444
gene3354	Y47H10A.5	Uncharacterized protein	NC_003279.8:12095803-12097939	8.79194	639.996	-6.18574	down	5e-05	0.00110206
gene19301	R10H10.3	Uncharacterized protein	NC_003282.8:10388519-10393236	249.976	43.428	2.52509	up	0.00285	0.022901
gene31895	mel-46	Uncharacterized protein	NC_003282.8:16855122-16863438	20.2805	47.8687	-1.23899	down	0.0037	0.027342
gene3699	F22G12.5	Uncharacterized protein	NC_003279.8:13162498-13182434	12.7501	31.6092	-1.30983	down	0.0019	0.0177989
gene42151	amt-4	Ammonium transporter	NC_003284.9:4565308-4569251	45.7947	4.28704	3.41713	up	0.0008	0.00954063
gene35406	C12D5.3	Uncharacterized protein	NC_003283.11:7676343-7676785	6.78783	0	-	up	0.00015	0.0027619
gene9594	chin-1	CHImaeriN (Rac-GTPase-activating protein) homolog	NC_003281.10:1031715-1037210	35.6371	97.4795	-1.45172	down	0.0043	0.0302499
gene44116	F36G3.1	Uncharacterized protein	NC_003284.9:9780725-9789192	27.4256	6.53331	2.06964	up	0.00045	0.00637744
gene44337	C39B10.5	Uncharacterized protein	NC_003284.9:10447350-10447722	6.3143	0	-	up	0.0068	0.0406502
gene7410	agxt-1	Serine--pyruvate aminotransferase	NC_003280.10:8846322-8848764	119.996	37.1227	1.69261	up	0.0008	0.00954063
gene8037	M28.9	Uncharacterized protein	NC_003280.10:10639782-10643536	27.5046	6.71294	2.03466	up	0.0018	0.0171731
gene3882	W04A8.6	Uncharacterized protein	NC_003279.8:13854648-13859551	20.1622	72.6329	-1.84897	down	0.0001	0.00197766
gene35476	C37C3.11	Uncharacterized protein	NC_003283.11:7863595-7864731	2.40434	0	-	up	0.0008	0.00954063
gene8269	sqt-1	Cuticle collagen sqt-1	NC_003280.10:11336727-11337749	530.018	15.9209	5.05705	up	5e-05	0.00110206
gene35748	F41E6.5	Uncharacterized protein	NC_003283.11:8603594-8605080	59.8547	13.388	2.16053	up	0.00155	0.0155028
gene33772	Y73C8C.8	Uncharacterized protein	NC_003283.11:3110182-3113501	0.269222	4.19254	-3.96096	down	0.00635	0.0391623
gene7890	R05H5.3	Uncharacterized protein	NC_003280.10:10197626-10198181	595.563	1846.29	-1.6323	down	0.0004	0.00586466
gene12379	vglu-3	Potential vesicular glutamate transporter vglu-3	NC_003281.10:10300425-10303290	11.5404	1.96281	2.5557	up	0.00755	0.0434243
gene45841	tatn-1	Tyrosine AminoTraNsferase	NC_003284.9:14791058-14792643	119.772	52.411	1.19235	up	0.00885	0.0475476
gene11419	mdown-4	Transmembrane matrix receptor Mdown-4	NC_003281.10:7480073-7489062	80.1376	9.89993	3.01699	up	5e-05	0.00110206
gene36638	D1054.9	Uncharacterized protein	NC_003283.11:10785951-10790811	52.1094	1.92378	4.75952	up	0.00165	0.0162477
gene11616	hsp-12.2	Heat shock protein Hsp-12.2	NC_003281.10:8138120-8139490	1813.65	408.359	2.15098	up	0.0001	0.00197766
gene7570	cam-1	Tyrosine-protein kinase receptor cam-1	NC_003280.10:9296408-9310301	21.4641	51.0856	-1.25099	down	0.00615	0.0382854
gene5058	sri-39	Serpentine Receptor, class I	NC_003280.10:2587503-2589639	0	4.04257	-	down	5e-05	0.00110206
gene906	ZK973.9	Uncharacterized protein	NC_003279.8:4370602-4372111	28.1679	89.2508	-1.66381	down	0.00495	0.0331462
gene11164	F37A4.5	Uncharacterized protein	NC_003281.10:6711943-6713108	60.7769	14.041	2.11388	up	0.0085	0.0467444
gene20188	let-99	Protein let-99	NC_003282.8:12567855-12570447	19.5459	78.7806	-2.01097	down	0.00015	0.0027619
gene1539	K06A5.2	Uncharacterized protein	NC_003279.8:6468181-6469356	184.639	67.3909	1.45408	up	0.00445	0.030911
gene44053	gpx-5	Glutathione peroxidase	NC_003284.9:9584694-9586137	217.109	88.7961	1.28985	up	0.0084	0.046519
gene39646	Y6G8.16	Uncharacterized protein	NC_003283.11:17606362-17606922	0	3.44466	-	down	0.0007	0.00881148
gene2668	T24D1.3	Uncharacterized protein	NC_003279.8:9958940-9960084	47.8092	182.545	-1.93289	down	0.00025	0.00406508
gene5369	F14D2.5	Uncharacterized protein	NC_003280.10:3340575-3341064	0	276.755	-	down	5e-05	0.00110206
gene33009	nstp-7	Nucleotide Sugar TransPorter family	NC_003283.11:581915-583431	10.7031	0	-	up	5e-05	0.00110206
gene37476	cdr-2	CaDmium Responsive	NC_003283.11:12414683-12415704	153.904	5.26997	4.86809	up	5e-05	0.00110206
gene6838	aqp-1	AQuaPorin or aquaglyceroporin related	NC_003280.10:7235927-7238332	347.135	35.4196	3.29288	up	5e-05	0.00110206
gene9380	pals-23	Protein containing ALS2cr12 (ALS2CR12) domain	NC_003281.10:124804-126419	76.9472	16.8229	2.19344	up	0.0028	0.0226976
gene7421	B0457.18	Unclassified non-coding RNA B0457.18	NC_003280.10:8891540-8891876	6.61231	0	-	up	0.00185	0.0174989
gene39825	clec-48	C-type LECtin	NC_003283.11:18158026-18159568	164.266	48.8492	1.74963	up	0.00105	0.0117915
gene2264	F55H12.4	Uncharacterized protein	NC_003279.8:8893412-8894136	398.183	66.9949	2.57131	up	5e-05	0.00110206
gene43705	nspc-5	Nematode Specific Peptide family, grodown C	NC_003284.9:8538739-8539090	0	20.2962	-	down	0.0024	0.0206697
gene10717	pdown-2	Poly(U) Polymerase	NC_003281.10:5186015-5187885	117.585	278.906	-1.24607	down	0.0037	0.027342
gene37469	K01D12.8	Uncharacterized protein	NC_003283.11:12402666-12403157	20.9293	0	-	up	5e-05	0.00110206
gene19069	F32B6.3	Uncharacterized protein	NC_003282.8:9882200-9884281	31.7076	81.0311	-1.35365	down	0.0084	0.046519
gene38352	rfc-1	RFC (DNA replication factor) family	NC_003283.11:14642803-14645745	49.2852	117.382	-1.25199	down	0.0028	0.0226976
gene34921	dgtr-1	DGAT (acyl-CoA:DiacylGlycerol AcylTransferase) Related	NC_003283.11:6497109-6498391	15.6243	85.3938	-2.45033	down	0.00025	0.00406508
gene11655	tsp-2	TetraSPanin family	NC_003281.10:8236983-8237873	8.65764	178.025	-4.36196	down	5e-05	0.00110206
gene6068	dct-5	Protein dct-5	NC_003280.10:5435838-5436933	102.109	7.83054	3.70485	up	0.0017	0.0164851
gene41608	spc-1	SPeCtrin	NC_003284.9:3117943-3127061	27.118	68.0006	-1.32629	down	0.00115	0.0125072
gene3769	C01A2.4	Uncharacterized protein	NC_003279.8:13392138-13393929	68.4297	254.574	-1.89539	down	0.0004	0.00586466
gene41223	Y102A11A.3	Uncharacterized protein	NC_003284.9:2019170-2025295	29.8067	12.2019	1.28854	up	0.00565	0.0362498
gene42362	Y34B4A.10	Uncharacterized protein	NC_003284.9:5249939-5252630	35.5047	1.06719	5.05613	up	0.0002	0.00345935
gene41798	tag-52	Putative protein tag-52	NC_003284.9:3674250-3678554	8.87502	29.3435	-1.72522	down	0.0028	0.0226976
gene722	smp-2	SeMaPhorin related	NC_003279.8:3667123-3671661	45.1803	11.7529	1.94268	up	0.0011	0.012147
gene36178	F40F9.5	Uncharacterized protein	NC_003283.11:9719914-9723960	43.2689	10.344	2.06453	up	0.00225	0.0200561
gene11052	gadr-3	Gastrulation-defective protein 3	NC_003281.10:6282443-6285944	0.499512	5.84621	-3.54891	down	0.00555	0.0357885
gene12068	cpar-1	Histone H3-like centromeric protein cpar-1	NC_003281.10:9434073-9435006	42.7429	146.449	-1.77664	down	0.0011	0.012147
gene37311	gana-1	GAlactosidase/N-Acetylgalactosaminidase	NC_003283.11:12087237-12088827	68.9843	20.8922	1.72331	up	0.00235	0.0203769
gene42663	C46F4.3	Uncharacterized protein	NC_003284.9:5935779-5937549	4.25609	0	-	up	0.0001	0.00197766
gene13557	ced-2	Uncharacterized protein	NC_003282.8:1597319-1601369	76.868	169.113	-1.13754	down	0.0093	0.0491516
gene42329	dpy-8	DumPY: shorter than wild-type	NC_003284.9:5148913-5150432	77.505	2.63145	4.88036	up	0.0001	0.00197766
gene13496	rfc-2	RFC (DNA replication factor) family	NC_003282.8:1347317-1352883	41.7569	102.211	-1.29147	down	0.0094	0.0495694
gene43820	ifd-1	Intermediate filament protein ifd-1	NC_003284.9:8820891-8824438	35.5358	4.38632	3.01819	up	0.0002	0.00345935
gene35963	F21C10.13	Uncharacterized protein	NC_003283.11:9122316-9123260	7.41773	0	-	up	5e-05	0.00110206
gene19229	gta-1	Probable 4-aminobutyrate aminotransferase, mitochondrial	NC_003282.8:10180667-10183757	642.681	230.792	1.47751	up	0.00115	0.0125072
gene723	ftn-2	Ferritin	NC_003279.8:3680289-3680899	1232.66	525.055	1.23124	up	0.0041	0.0293037
gene36456	ugt-1	UDP-GlucuronosylTransferase	NC_003283.11:10395714-10397734	36.6823	5.79149	2.66308	up	0.0005	0.00687417
gene8056	col-39	Cuticle collagen 39	NC_003280.10:10702648-10714295	670.983	69.9201	3.2625	up	0.0079	0.0446767
gene19579	swsn-4	SWI/SNF nucleosome remodeling complex component	NC_003282.8:11126073-11130824	36.4878	84.8197	-1.21698	down	0.0033	0.0253951
gene7315	puf-5	Pumilio domain-containing protein 5	NC_003280.10:8575576-8577416	131.932	630.202	-2.25602	down	5e-05	0.00110206
gene12935	agmo-1	Alkylglycerol monooxygenase	NC_003281.10:12793497-12798119	46.695	1.55958	4.90404	up	0.0006	0.00788238
gene18652	T28C6.3	Uncharacterized protein	NC_003282.8:8820355-8821164	0	16.3427	-	down	5e-05	0.00110206
gene10246	acy-3	Adenylyl CYclase	NC_003281.10:3775170-3786444	13.1815	4.59355	1.52083	up	0.00835	0.0463662
gene11583	dpf-6	Dipeptidyl peptidase family member 6	NC_003281.10:8038246-8041114	26.2991	3.93968	2.73887	up	0.00125	0.0133406
gene32087	nep-23	NEPrilysin metallopeptidase family	NC_003282.8:16920510-16924071	15.6892	2.73565	2.51982	up	0.00535	0.0349206
gene37711	mpst-7	MercaptoPyruvate SulfurTransferase homolog	NC_003283.11:12955286-12961129	21.1354	2.86991	2.88059	up	0.0039	0.0283268
gene9944	W04B5.3	Galectin	NC_003281.10:2418513-2423859	33.6489	105.753	-1.65206	down	0.0003	0.00471148
gene9690	Y82E9BL.5	Uncharacterized protein	NC_003281.10:1346314-1347128	0	1.74661	-	down	0.0001	0.00197766
gene42258	ifa-4	Intermediate filament protein ifa-4	NC_003284.9:4912611-4915976	92.5013	32.8206	1.49487	up	0.00205	0.018779
gene12304	T16G12.1	Uncharacterized protein	NC_003281.10:10040250-10049743	23.6381	1.02145	4.53242	up	5e-05	0.00110206
gene35229	C05C8.8	Uncharacterized protein	NC_003283.11:7252324-7255157	1.14637	0	-	up	5e-05	0.00110206
gene45818	tsp-8	Tetraspanin	NC_003284.9:14726681-14729434	83.7182	20.6592	2.01876	up	0.0028	0.0226976
gene8230	T06D8.10	Uncharacterized protein	NC_003280.10:11241067-11247506	34.5695	1.48175	4.54412	up	5e-05	0.00110206
gene5884	ulp-2	Ubiquitin-like protease 2	NC_003280.10:4956005-4959817	24.9994	61.7326	-1.30414	down	0.0043	0.0302499
gene5916	ify-1	Interactor of FizzY protein	NC_003280.10:5054260-5055155	116.958	260.713	-1.15647	down	0.0094	0.0495694
gene8440	patr-1	Protein PAT1 homolog 1	NC_003280.10:11775032-11777920	47.8108	170.124	-1.83118	down	5e-05	0.00110206
gene43708	sdha-1	Succinate dehydrogenase [ubiquinone	NC_003284.9:8543209-8546015	134.734	53.9889	1.31938	up	0.00155	0.0155028
gene4780	fbxb-12	-	NC_003280.10:1753525-1754439	0	3.54299	-	down	5e-05	0.00110206
gene5214	C41H7.4	Uncharacterized protein	NC_003280.10:3003981-3005510	3.60782	23.4681	-2.7015	down	0.00275	0.0224019
gene34632	K09H11.1	Uncharacterized protein	NC_003283.11:5747819-5751953	22.2727	8.32832	1.41918	up	0.00595	0.037463
gene20169	F53B2.8	Uncharacterized protein	NC_003282.8:12526398-12527219	247.647	834.135	-1.75199	down	0.0002	0.00345935
gene36409	col-149	COLlagen	NC_003283.11:10291793-10292812	156.364	6.54423	4.57854	up	5e-05	0.00110206
gene1268	npp-7	Nuclear Pore complex Protein	NC_003279.8:5692265-5696688	51.0586	122.84	-1.26655	down	0.00335	0.025732
gene10234	C14B1.9	Uncharacterized protein	NC_003281.10:3725154-3726498	86.0014	250.831	-1.54428	down	0.00065	0.0083666
gene8841	F32A11.3	Uncharacterized protein	NC_003280.10:13151544-13153316	95.4492	35.1623	1.4407	up	0.00635	0.0391623
gene39254	W06G6.10	Uncharacterized protein	NC_003283.11:16646790-16647193	0	2.66228	-	down	0.0087	0.0470932
gene40925	mam-1	MAM (Meprin, A5-protein, PTPmu) domain protein	NC_003284.9:883209-888380	7.69259	0.406598	4.2418	up	0.0017	0.0164851
gene39255	W06G6.20	Uncharacterized protein	NC_003283.11:16648081-16648365	0	66.5856	-	down	0.00655	0.0399345
gene37606	dhs-21	L-xylulose reductase	NC_003283.11:12731831-12733561	185.676	56.9202	1.70578	up	0.0016	0.0158972
gene32319	Y116A8C.20	Uncharacterized protein	NC_003282.8:17040917-17041523	0	5.02916	-	down	5e-05	0.00110206
gene35362	ets-7	ETS class transcription factor	NC_003283.11:7557756-7558783	0	8.28925	-	down	5e-05	0.00110206
gene4520	fbxb-41	F-box B protein	NC_003280.10:1041363-1042302	0	13.3717	-	down	5e-05	0.00110206
gene42068	R160.10	Uncharacterized protein	NC_003284.9:4367167-4367512	0	31.7846	-	down	0.00035	0.00529575
gene35248	F07G11.1	Uncharacterized protein	NC_003283.11:7307388-7309556	1.14703	0	-	up	5e-05	0.00110206
gene4242	chs-2	CHitin Synthase	NC_003280.10:196984-211649	11.2525	2.20708	2.35003	up	0.0017	0.0164851
gene7626	kin-15	Receptor-like tyrosine-protein kinase kin-15	NC_003280.10:9431440-9433625	10.1863	2.01392	2.33855	up	0.0063	0.0389701
gene19034	pis-1	PIS (Pax-2, IA-1/6, Smad-2 interacting protein) homolog	NC_003282.8:9792093-9796589	11.7552	27.8335	-1.24353	down	0.0065	0.0397321
gene1737	W01A8.6	Uncharacterized protein	NC_003279.8:7070755-7074709	41.6211	2.09283	4.31379	up	0.0006	0.00788238
gene39268	F14F8.8	Uncharacterized protein	NC_003283.11:16671640-16672162	142.341	0	-	up	0.00235	0.0203769
gene41866	ttr-48	TransThyretin-Related family domain	NC_003284.9:3840983-3842447	1082.5	242.599	2.15772	up	5e-05	0.00110206
gene858	ppw-1	Piwi-like protein	NC_003279.8:4185059-4189759	51.6386	500.221	-3.27604	down	5e-05	0.00110206
gene12772	faah-4	Fatty Acid Amide Hydrolase homolog	NC_003281.10:11899547-11906877	46.6242	105.164	-1.1735	down	0.00585	0.037059
gene42464	bus-8	Uncharacterized protein	NC_003284.9:5493759-5495547	44.9561	2.04665	4.45718	up	0.0006	0.00788238
gene19504	Y69E1A.2	Uncharacterized protein	NC_003282.8:10949877-10951076	127.377	35.5287	1.84205	up	0.0003	0.00471148
gene5956	F58A6.1	Uncharacterized protein	NC_003280.10:5142927-5143950	93.0428	22.9843	2.01724	up	0.0042	0.0297487
gene4800	C08F1.12	Uncharacterized protein	NC_003280.10:1805710-1806458	0	3.25778	-	down	0.00195	0.0181441
gene5043	K02F6.7	Uncharacterized protein	NC_003280.10:2525348-2529244	13.9491	44.3622	-1.66916	down	0.00185	0.0174989
gene19215	tsp-12	Tetraspanin	NC_003282.8:10149432-10150553	76.1157	202.51	-1.41173	down	0.00285	0.022901
gene18633	F20C5.4	Uncharacterized protein	NC_003282.8:8764879-8767306	16.827	49.014	-1.54242	down	0.0067	0.0406097
gene22732	fbxa-83	F-box A protein	NC_003282.8:14323385-14325645	1.63539	20.0643	-3.61693	down	0.0065	0.0397321
gene32919	F33E11.2	Uncharacterized protein	NC_003283.11:297948-299836	40.4509	122.752	-1.60151	down	0.003	0.0237149
gene5598	F53C3.11	Uncharacterized protein	NC_003280.10:3905154-3906620	0	2.31916	-	down	5e-05	0.00110206
gene13055	T03F6.4	Uncharacterized protein	NC_003281.10:13386198-13388275	23.4215	3.24453	2.85175	up	0.0038	0.0277956
gene7598	C06C3.7	Uncharacterized protein	NC_003280.10:9385547-9386276	0	3.17256	-	down	0.0046	0.0315165
gene10771	Y32H12A.8	Uncharacterized protein	NC_003281.10:5385837-5404982	5.04705	11.7488	-1.21901	down	0.00555	0.0357885
gene13155	tyr-2	TYRosinase	NC_003281.10:13744226-13747075	102.588	16.0777	2.67372	up	5e-05	0.00110206
gene43205	spp-5	SaPosin-like Protein family	NC_003284.9:7319993-7320353	26501.1	10984.5	1.27058	up	0.0084	0.046519
gene17174	C49A9.2	Uncharacterized protein	NC_003282.8:6225450-6227914	28.4291	9.34065	1.60577	up	0.0069	0.0409522
gene13100	pod-1	Uncharacterized protein	NC_003281.10:13515424-13524093	79.8195	246.536	-1.62699	down	0.00045	0.00637744
gene280	Y73E7A.8	Uncharacterized protein	NC_003279.8:1634813-1643970	7.21244	0.886194	3.02479	up	0.00435	0.0304721
gene33911	lys-7	LYSozyme	NC_003283.11:3481480-3482599	2183.93	315.886	2.78945	up	5e-05	0.00110206
gene38113	D1086.17	Uncharacterized protein	NC_003283.11:14067933-14071175	89.4926	26.6905	1.74544	up	0.00575	0.0366781
gene43204	spp-4	SaPosin-like Protein family	NC_003284.9:7318343-7318755	3217.54	195.812	4.03842	up	0.00045	0.00637744
gene19369	lgc-43	Ligand-Gated ion Channel	NC_003282.8:10578785-10581773	16.1607	3.00178	2.4286	up	0.0034	0.0259595
gene37266	cpr-1	Gut-specific cysteine proteinase	NC_003283.11:11975579-11976697	4006.84	397.517	3.33338	up	5e-05	0.00110206
gene7707	ZK1307.9	Coiled-coil domain-containing protein 130 homolog	NC_003280.10:9649490-9650887	40.7268	107.693	-1.40287	down	0.00375	0.0274906
gene12834	gmn-1	GeMiNin homolog	NC_003281.10:12224632-12225331	117.003	375.473	-1.68216	down	0.00135	0.0140456
gene12211	ZK632.12	Uncharacterized protein	NC_003281.10:9830837-9832258	90.6767	240.874	-1.40947	down	0.0035	0.0265151
gene9389	fbxb-84	F-box B protein	NC_003281.10:145543-146463	0	27.2177	-	down	5e-05	0.00110206
gene4346	lips-7	LIPaSe related	NC_003280.10:553101-554698	50.9153	2.54085	4.32472	up	0.0013	0.0137063
gene14792	ssq-4	Sperm-Specific family, class Q	NC_003282.8:5016508-5017724	351.442	114.761	1.61465	up	0.00045	0.00637744
gene4515	F45D11.1	-	NC_003280.10:1021504-1023528	1.36057	0	-	up	5e-05	0.00110206
gene37385	lrx-1	LRP X(cross)-hybridizing	NC_003283.11:12252777-12255394	31.0084	1.56738	4.30623	up	0.0008	0.00954063
gene1501	F26B1.8	Uncharacterized protein	NC_003279.8:6329601-6330126	615.792	194.901	1.6597	up	0.0009	0.010484
gene44647	tni-1	Troponin I 1	NC_003284.9:11376160-11377461	194.113	40.1718	2.27264	up	0.0001	0.00197766
gene41434	ttr-42	TransThyretin-Related family domain	NC_003284.9:2577750-2578212	43.4433	287.033	-2.72401	down	0.00185	0.0174989
gene11667	col-91	Putative cuticle collagen 91	NC_003281.10:8258344-8265688	426.352	29.3497	3.86063	up	5e-05	0.00110206
gene8774	clec-63	C-type LECtin	NC_003280.10:12895639-12897387	2550.27	764.666	1.73775	up	0.00285	0.022901
gene1014	rpa-2	Replication Protein A homolog	NC_003279.8:4770303-4771266	179.428	512.142	-1.51314	down	0.00035	0.00529575
gene2657	Y106G6A.4	Uncharacterized protein	NC_003279.8:9931013-9931838	93.3486	24.4326	1.93382	up	0.00685	0.0408311
gene39070	F21H7.2	Uncharacterized protein	NC_003283.11:16227153-16229569	17.8123	4.80218	1.89112	up	0.0067	0.0406097
gene40705	acs-12	fatty Acid CoA Synthetase family	NC_003283.11:20904174-20907333	21.4177	5.82428	1.87865	up	0.0087	0.0470932
gene1579	mei-2	Meiotic spindle formation protein 2	NC_003279.8:6564867-6565850	95.1694	314.131	-1.7228	down	0.00035	0.00529575
gene41466	igcm-3	ImmunoGlobulin-like Cell adhesion Molecule family	NC_003284.9:2698973-2705856	15.5504	40.3227	-1.37464	down	0.00755	0.0434243
gene7892	R05H5.5	Uncharacterized protein	NC_003280.10:10199950-10200815	43.7842	125.188	-1.51562	down	0.0069	0.0409522
gene4147	pole-1	DNA polymerase	NC_003279.8:15005699-15013874	12.6196	38.654	-1.61495	down	0.00035	0.00529575
gene36626	F28H7.8	CRAL-TRIO domain-containing protein F28H7.8	NC_003283.11:10758959-10760569	24.8904	4.50954	2.46454	up	0.0033	0.0253951
gene36642	D1054.10	Uncharacterized protein	NC_003283.11:10792108-10792810	555.383	3394.18	-2.61151	down	5e-05	0.00110206
gene11450	R13A5.10	Uncharacterized protein	NC_003281.10:7582111-7582979	54.7397	6.44203	3.087	up	0.0049	0.0329045
gene10256	toh-1	Zinc metalloproteinase nas-26	NC_003281.10:3805107-3809014	44.6476	14.182	1.65452	up	0.0055	0.0356048
gene2786	ZC434.9	Uncharacterized protein	NC_003279.8:10356310-10360601	48.9916	8.30106	2.56117	up	0.00055	0.00740175
gene12395	T07C4.3	Uncharacterized protein	NC_003281.10:10352221-10354753	55.9501	136.283	-1.2844	down	0.00265	0.0219547
gene4495	fbxc-14	F-box C protein	NC_003280.10:974302-975511	0	3.01621	-	down	5e-05	0.00110206
gene6927	wrt-1	Warthog protein 1 N-product	NC_003280.10:7531182-7533140	87.1501	4.71376	4.20855	up	0.00015	0.0027619
gene33509	pud-1.1	Protein down-regulated in Daf-2(gf)	NC_003283.11:2330428-2330930	1.39417	0	-	up	0.0068	0.0406502
gene4620	aat-7	Amino Acid Transporter	NC_003280.10:1386887-1391567	2.21561	0	-	up	5e-05	0.00110206
gene40871	T19D7.6	Uncharacterized protein	NC_003284.9:669756-670683	67.9188	12.4675	2.44564	up	0.006	0.0376633
gene14336	ZK185.4	Uncharacterized protein	NC_003282.8:4531221-4533121	1.03505	0	-	up	0.0002	0.00345935
gene12343	mua-3	Transmembrane cell adhesion receptor mua-3	NC_003281.10:10160696-10183260	30.3034	5.60843	2.43381	up	5e-05	0.00110206
gene2516	lem-3	LEM domain protein	NC_003279.8:9578716-9581267	22.7644	58.9154	-1.37187	down	0.00445	0.030911
gene7756	cyp-13A2	Putative cytochrome P450 CYP13A2	NC_003280.10:9783817-9787353	16.3564	1.24652	3.71388	up	0.00135	0.0140456
gene31638	Y43D4A.5	Uncharacterized protein	NC_003282.8:16775846-16785057	8.34233	0.365995	4.51055	up	0.00125	0.0133406
gene13116	osm-7	Uncharacterized protein	NC_003281.10:13576203-13580539	34.9841	8.84718	1.98341	up	0.001	0.0113532
gene5497	fbxb-33	F-box B protein	NC_003280.10:3647433-3648599	0	3.53657	-	down	5e-05	0.00110206
gene396	epg-2	Ectopic P granules protein 2	NC_003279.8:2297816-2304392	9.60064	80.6131	-3.06981	down	0.001	0.0113532
gene35269	C03G6.6	Uncharacterized protein	NC_003283.11:7357450-7358882	1.6796	0	-	up	5e-05	0.00110206
gene2871	set-18	SET (trithorax/polycomb) domain containing	NC_003279.8:10590812-10593840	44.3986	13.4893	1.7187	up	0.00395	0.0286021
gene4481	fbxc-36	F-box C protein	NC_003280.10:941116-943108	2.38532	26.1875	-3.45662	down	0.00135	0.0140456
gene37731	far-3	Fatty Acid/Retinol binding protein	NC_003283.11:12996879-12997512	872.305	73.4122	3.57074	up	5e-05	0.00110206
gene19272	R09E10.13	Uncharacterized protein	NC_003282.8:10294910-10295126	0	3072.39	-	down	0.00135	0.0140456
gene1942	VH15N14R.1	Uncharacterized protein	NC_003279.8:7779418-7785798	0	3.57755	-	down	5e-05	0.00110206
gene8698	ceh-100	C. Elegans Homeobox	NC_003280.10:12582375-12603680	11.7458	32.9742	-1.48919	down	0.0008	0.00954063
gene44291	fipr-21	FIP (Fungus-Induced Protein) Related	NC_003284.9:10304528-10304867	2903	814.239	1.83402	up	0.0002	0.00345935
gene11362	zmp-6	Zinc MetalloProtease	NC_003281.10:7245808-7247768	25.1336	1.13549	4.46823	up	0.0065	0.0397321
gene41578	twk-26	TWiK family of potassium channels	NC_003284.9:3050493-3054413	13.2561	2.13336	2.63546	up	0.00645	0.0395579
gene34967	hcp-1	HoloCentric chromosome binding Protein	NC_003283.11:6594225-6599002	25.7431	73.1378	-1.50643	down	0.00055	0.00740175
gene37348	usip-1	U Six snRNA Interacting Protein	NC_003283.11:12181744-12184175	69.3611	189.267	-1.44822	down	0.0005	0.00687417
gene32657	Y116A8B.1	Uncharacterized protein	NC_003282.8:17216792-17217208	0	22.9843	-	down	5e-05	0.00110206
gene1561	T10E9.3	Uncharacterized protein	NC_003279.8:6534116-6539029	162.591	6.50716	4.64307	up	5e-05	0.00110206
gene42262	mct-4	MonoCarboxylate Transporter family	NC_003284.9:4921937-4929751	65.1749	12.6132	2.36938	up	0.00015	0.0027619
gene3092	Y53H1B.2	Uncharacterized protein	NC_003279.8:11292710-11294152	181.36	402.984	-1.15187	down	0.0082	0.0458099
gene252	Y92H12BR.3	Uncharacterized protein	NC_003279.8:1416590-1424608	104.125	220.014	-1.07928	down	0.0058	0.0368834
gene17999	ZC477.7	Uncharacterized protein	NC_003282.8:7110493-7111333	88.2683	17.1407	2.36447	up	0.0082	0.0458099
gene6059	EEED8.2	Uncharacterized protein	NC_003280.10:5416735-5418359	3.2943	30.7725	-3.2236	down	0.00085	0.0100071
gene13454	cec-2	C.Elegans Chromodomain protein	NC_003282.8:1170709-1176675	17.8563	48.6391	-1.44568	down	0.00685	0.0408311
gene10864	hpo-28	Uncharacterized protein	NC_003281.10:5706751-5709323	20.451	3.88415	2.3965	up	0.00355	0.0267227
gene19334	F01D4.5	Uncharacterized protein	NC_003282.8:10482758-10483648	48.7685	149.154	-1.61278	down	0.00455	0.031421
gene19003	K01H12.4	Uncharacterized protein	NC_003282.8:9713219-9714800	51.4944	13.9019	1.88913	up	0.0089	0.0477387
gene17945	cht-3	Chitinase-like protein C25A8.4	NC_003282.8:7003624-7009231	19.768	137.672	-2.79999	down	5e-05	0.00110206
gene3491	C54C8.12	Uncharacterized protein	NC_003279.8:12456925-12457174	0	139.294	-	down	5e-05	0.00110206
gene11295	cpg-2	Chondroitin proteoglycan-2	NC_003281.10:7102235-7103986	473.618	1520.78	-1.68302	down	0.0036	0.0269886
gene12406	hat-1	Histone AcetylTransferase	NC_003281.10:10405834-10407241	74.1656	235.022	-1.66397	down	0.0002	0.00345935
gene39186	sqst-4	SeQueSTosome related	NC_003283.11:16488511-16489104	1.66349	0	-	up	0.0008	0.00954063
gene40099	cyp-42A1	CYtochrome P450 family	NC_003283.11:18912041-18917833	23.849	6.35586	1.90777	up	0.0076	0.0436209
gene5458	W10G11.1	Uncharacterized protein	NC_003280.10:3559705-3560692	0	1.1562	-	down	0.00305	0.0239614
gene40674	F38A6.4	Uncharacterized protein	NC_003283.11:20773880-20775333	112.26	6.66447	4.07421	up	0.0055	0.0356048
gene12884	ani-1	Anillin-like protein 1	NC_003281.10:12446674-12453184	35.8752	97.8244	-1.44721	down	0.0014	0.0144568
gene1010	kca-1	Kinesin Cargo Adaptor	NC_003279.8:4759983-4761307	36.3007	109.696	-1.59544	down	0.00155	0.0155028
gene36099	acs-14	fatty Acid CoA Synthetase family	NC_003283.11:9508133-9510339	137.752	42.3153	1.70282	up	0.0005	0.00687417
gene44853	lsd-1	Lysine-Specific histone Demethylase homolog	NC_003284.9:11948852-11951706	2.8884	15.5027	-2.42418	down	0.0045	0.0311798
gene4747	fbxb-25	F-box B protein	NC_003280.10:1684047-1685031	0	2.13836	-	down	0.0004	0.00586466
gene18374	rig-4	Protein sidekick homolog	NC_003282.8:7991854-8004044	9.23261	22.8923	-1.31005	down	0.00255	0.0213614
gene44142	gst-36	Probable glutathione S-transferase gst-36	NC_003284.9:9861764-9862955	200.307	63.5486	1.65628	up	0.0029	0.0232014
gene1076	pat-10	Paralysed Arrest at Two-fold	NC_003279.8:5019002-5020063	10908.8	2850.31	1.9363	up	0.0017	0.0164851
gene840	R12E2.15	Uncharacterized protein	NC_003279.8:4148940-4149411	13137.3	485.903	4.75686	up	0.0024	0.0206697
gene4957	K09F6.3	Protein-tyrosine-phosphatase	NC_003280.10:2256305-2261099	14.786	4.9146	1.58909	up	0.00605	0.0379052
gene4024	unc-95	Uncharacterized protein	NC_003279.8:14381454-14384737	44.7898	8.79419	2.34855	up	0.0007	0.00881148
gene34664	let-418	Protein let-418	NC_003283.11:5826860-5832694	35.6669	83.1153	-1.22053	down	0.0037	0.027342
gene9798	tbx-43	T BoX family	NC_003281.10:1765457-1770091	0	4.02513	-	down	5e-05	0.00110206
gene34530	T05C3.6	Uncharacterized protein	NC_003283.11:5490461-5493590	30.1473	4.42341	2.7688	up	0.0021	0.0190682
gene5999	ptr-6	PaTched Related family	NC_003280.10:5242565-5246835	18.7328	4.48344	2.06289	up	0.0025	0.0211243
gene33171	cpr-5	Cathepsin B-like cysteine proteinase 5	NC_003283.11:1132685-1133954	1077.11	260.285	2.04901	up	0.0001	0.00197766
gene14161	str-122	Seven TM Receptor	NC_003282.8:4065904-4068412	0	0.862009	-	down	5e-05	0.00110206
gene35352	C54F6.2	-	NC_003283.11:7535581-7536416	0.995505	0	-	up	0.0001	0.00197766
gene19698	kin-4	protein KINase	NC_003282.8:11425741-11446645	38.0324	83.9692	-1.14263	down	0.0054	0.0351637
gene33306	Y46H3C.5	Uncharacterized protein	NC_003283.11:1691028-1691735	2.43069	80.0932	-5.04224	down	0.00585	0.037059
gene11168	F37A4.2	Uncharacterized protein	NC_003281.10:6722555-6723224	94.5647	246.803	-1.38399	down	0.00675	0.0406502
gene10031	F56F11.4	Uncharacterized protein	NC_003281.10:2856228-2865386	42.4182	111.343	-1.39226	down	0.00325	0.0251037
gene33052	fbxa-72	F-box A protein	NC_003283.11:675002-676753	70.4541	8.29879	3.08571	up	0.0007	0.00881148
gene5039	gbas-1	Ga Binding and Activating and Spk (SPK) domain containing	NC_003280.10:2504881-2514625	12.2781	32.7188	-1.41403	down	0.00545	0.0354058
gene5934	C04G6.13	Uncharacterized protein	NC_003280.10:5094759-5095370	3.70913	0	-	up	0.00025	0.00406508
gene45611	F28H6.8	Uncharacterized protein	NC_003284.9:14133895-14134289	0	4.94882	-	down	0.00825	0.0459496
gene4342	lgc-34	Ligand-Gated ion Channel	NC_003280.10:526663-530220	83.4868	5.74491	3.86119	up	0.0001	0.00197766
gene44540	lpr-6	LiPocalin-Related protein	NC_003284.9:11059993-11061630	103.087	12.8662	3.00219	up	5e-05	0.00110206
gene43304	F46C8.8	Uncharacterized protein	NC_003284.9:7551371-7554419	125.205	2.6811	5.54533	up	0.0012	0.0129489
gene4287	cbn-1	Non-coding transcript of protein-coding gene cbn-1	NC_003280.10:328630-332511	10.6369	1.41191	2.91335	up	0.00735	0.0426146
gene13570	Y41D4B.6	Uncharacterized protein	NC_003282.8:1633799-1637367	0	3.26502	-	down	5e-05	0.00110206
gene6836	F32A5.4	Uncharacterized protein	NC_003280.10:7229152-7230452	529.961	226.168	1.2285	up	0.00385	0.0280498
gene39250	W06G6.17	Uncharacterized protein	NC_003283.11:16644798-16645237	0	4.33486	-	down	0.00745	0.0430887
gene1787	C01H6.4	Flavin-containing monooxygenase	NC_003279.8:7210592-7212440	24.4045	3.11555	2.96959	up	0.0037	0.027342
gene2536	rba-1	Probable histone-binding protein rba-1	NC_003279.8:9616605-9618101	67.1979	152.527	-1.18258	down	0.0056	0.0359988
gene46662	C36E6.8	Uncharacterized protein	NC_003284.9:17438751-17439668	270.411	17.4513	3.95375	up	0.0024	0.0206697
gene12021	fozi-1	Formin-homology and zinc finger domains protein 1	NC_003281.10:9293204-9296017	28.0669	5.70645	2.2982	up	0.00085	0.0100071
gene36617	wdr-5.3	WD repeat-containing protein wdr-5.3	NC_003283.11:10737117-10739111	39.8996	120.828	-1.59851	down	0.0012	0.0129489
gene10360	asd-1	Uncharacterized protein	NC_003281.10:4197297-4201825	25.4528	86.7515	-1.76907	down	0.001	0.0113532
gene19759	F12F6.1	Uncharacterized protein	NC_003282.8:11585224-11588043	41.7878	87.3857	-1.06432	down	0.0089	0.0477387
gene19480	F13E9.8	Uncharacterized protein	NC_003282.8:10893647-10894355	1.85556	0	-	up	0.0001	0.00197766
gene46144	K09A9.6	Uncharacterized protein	NC_003284.9:15577655-15586748	16.1003	2.6588	2.59824	up	0.00065	0.0083666
gene15207	msp-19	Major sperm protein 19/31/40/45/50/51/53/59/61/65/81/113/142	NC_003282.8:5260588-5260972	1904.99	517.162	1.88109	up	0.00025	0.00406508
gene18956	spp-18	SaPosin-like Protein family	NC_003282.8:9593726-9594343	1274.97	294.721	2.11304	up	0.0005	0.00687417
gene18583	cyp-33E2	CYtochrome P450 family	NC_003282.8:8612579-8614614	26.2651	5.09959	2.36469	up	0.00145	0.014816
gene43512	K07E3.9	Uncharacterized protein	NC_003284.9:8108093-8109124	42.7932	2.69794	3.98745	up	0.0022	0.0197487
gene38365	C47E8.4	Protein FAM50 homolog	NC_003283.11:14683823-14685477	47.0648	107.73	-1.1947	down	0.0091	0.0485597
gene41605	gpd-3	Glyceraldehyde-3-phosphate dehydrogenase 3	NC_003284.9:3112199-3113321	791.475	263.817	1.585	up	0.00015	0.0027619
gene35209	F09G2.8	Probable phospholipase D F09G2.8	NC_003283.11:7188533-7193658	53.8382	137.622	-1.354	down	0.0013	0.0137063
gene8336	B0334.10	Uncharacterized protein	NC_003280.10:11518487-11519571	2.54758	0	-	up	0.0001	0.00197766
gene46538	C30E1.8	Uncharacterized protein	NC_003284.9:16916811-16919319	0	1.81436	-	down	5e-05	0.00110206
gene3016	Y52B11A.8	Phospholipase A2-like protein Y52B11A.8	NC_003279.8:11032341-11033954	58.4302	182.997	-1.64703	down	0.00605	0.0379052
gene44834	ule-5	Uterine Lumin Expressed/locailized	NC_003284.9:11883152-11883979	286.649	2098.49	-2.872	down	5e-05	0.00110206
gene34053	cyp-35B2	CYtochrome P450 family	NC_003283.11:3942214-3944457	1.57711	0	-	up	5e-05	0.00110206
gene37822	zip-5	bZIP transcription factor family	NC_003283.11:13264545-13269820	15.5408	141.886	-3.1906	down	0.00045	0.00637744
gene23159	F55B11.3	Uncharacterized protein	NC_003282.8:14424708-14425536	69.5813	264.448	-1.92621	down	0.00045	0.00637744
gene18500	F17E9.5	Uncharacterized protein	NC_003282.8:8345882-8346504	390.376	130.963	1.5757	up	0.00515	0.0340992
gene4105	hinf-1	HIstone Nuclear Factor p (P) homolog	NC_003279.8:14791057-14793862	35.9784	102.093	-1.50467	down	0.00155	0.0155028
gene36975	K03B8.6	Uncharacterized protein	NC_003283.11:11407584-11409125	52.3372	5.84009	3.16378	up	0.0005	0.00687417
gene3168	abhd-11.1	ABHydrolase Domain containing homolog	NC_003279.8:11515126-11517108	0	0.836743	-	down	5e-05	0.00110206
gene4804	linc-16	long non-coding RNA linc-16	NC_003280.10:1820241-1820946	6.49784	47.0413	-2.8559	down	0.003	0.0237149
gene34987	pmp-5	Peroxisomal Membrane Protein related	NC_003283.11:6662258-6665808	315.037	14.0061	4.4914	up	5e-05	0.00110206
gene1983	T22C1.5	Uncharacterized protein	NC_003279.8:7940918-7941697	74.5154	243.856	-1.71042	down	0.0022	0.0197487
gene1303	nhr-2	Nuclear hormone receptor family member nhr-2	NC_003279.8:5818871-5821108	1.87078	30.5554	-4.02971	down	0.00045	0.00637744
gene42868	asp-14	ASpartyl Protease	NC_003284.9:6444231-6446606	75.9091	28.8431	1.39605	up	0.00705	0.0414707
gene11806	C13G5.2	Uncharacterized protein	NC_003281.10:8616867-8618438	42.9048	123.083	-1.52042	down	0.0027	0.0221472
gene1970	F55D12.2	Uncharacterized protein	NC_003279.8:7889556-7894716	27.3547	6.23385	2.1336	up	0.0026	0.0216488
gene11580	F44B9.8	Probable replication factor C subunit 5	NC_003281.10:8028314-8029649	73.075	182.56	-1.32092	down	0.0043	0.0302499
gene7808	ufd-3	Ubiquitin Fusion Degradation (yeast UFD homolog)	NC_003280.10:9940760-9943791	98.5843	241.907	-1.29502	down	0.0041	0.0293037
gene908	cec-10	C.Elegans Chromodomain protein	NC_003279.8:4373663-4379140	34.3367	72.4331	-1.0769	down	0.0095	0.0499059
gene44687	F29G6.1	Uncharacterized protein	NC_003284.9:11502461-11509359	6.88859	0.629516	3.4519	up	0.0011	0.012147
gene41129	Y75D11A.3	Uncharacterized protein	NC_003284.9:1745525-1746201	8.58326	53.7538	-2.64677	down	0.00365	0.0271788
gene34428	abu-15	Activated in Blocked Unfolded protein response	NC_003283.11:5158622-5159836	31.7138	2.5676	3.62661	up	0.00095	0.0109508
gene42406	sek-4	SAPK/ERK kinase	NC_003284.9:5375069-5376836	32.4154	4.70751	2.78364	up	0.0014	0.0144568
gene8798	cyd-1	G1/S-specific cyclin-D	NC_003280.10:12988222-12992554	4.73094	20.5345	-2.11785	down	0.004	0.028838
gene4423	F46F5.16	Uncharacterized protein	NC_003280.10:787311-787994	0.961723	0	-	up	0.0068	0.0406502
gene17384	puf-11	PUF (Pumilio/FBF) domain-containing	NC_003282.8:6421607-6423309	102.112	378.331	-1.8895	down	0.0001	0.00197766
gene35557	str-131	Seven TM Receptor	NC_003283.11:8080366-8081678	4.26157	0	-	up	5e-05	0.00110206
gene44833	Y62H9A.5	Uncharacterized protein	NC_003284.9:11882192-11882882	297.979	2481.57	-3.05797	down	5e-05	0.00110206
gene5937	C04G6.7	Uncharacterized protein	NC_003280.10:5100411-5101783	28.1492	2.61006	3.43094	up	0.0062	0.0384809
gene19493	ZK593.3	Uncharacterized protein	NC_003282.8:10916614-10917565	277.08	34.2101	3.01781	up	0.0008	0.00954063
gene5453	apd-3	AP-3 complex subunit delta	NC_003280.10:3532889-3546421	9.57697	24.195	-1.33707	down	0.00515	0.0340992
gene1389	ZK484.5	Uncharacterized protein	NC_003279.8:6087429-6087729	2135.34	469.117	2.18645	up	0.0011	0.012147
gene20257	ZK896.4	Uncharacterized protein	NC_003282.8:12880666-12883146	5.02305	323.247	-6.00793	down	5e-05	0.00110206
gene41104	R09H3.3	Uncharacterized protein	NC_003284.9:1667335-1668080	0	1.79015	-	down	0.00045	0.00637744
gene4792	C08F1.11	Uncharacterized protein	NC_003280.10:1783539-1784442	0	12.3573	-	down	5e-05	0.00110206
gene1518	ZC328.5	Uncharacterized protein	NC_003279.8:6405881-6406936	0	1.21135	-	down	0.0071	0.041617
gene3167	F32B4.2	Uncharacterized protein	NC_003279.8:11512939-11513813	126.378	29.5362	2.09719	up	0.00865	0.0470843
gene37053	C55A6.7	Uncharacterized protein	NC_003283.11:11519483-11520433	47.694	8.9464	2.41443	up	0.0037	0.027342
gene41212	F52D2.12	Uncharacterized protein	NC_003284.9:1978074-1980513	2.2886	12.8456	-2.48874	down	0.00415	0.0294575
gene38497	mcm-3	DNA helicase	NC_003283.11:15056959-15059594	39.2803	138.857	-1.82172	down	5e-05	0.00110206
gene19583	F01G4.4	Uncharacterized protein	NC_003282.8:11143349-11145598	19.6211	49.7765	-1.34306	down	0.00495	0.0331462
gene43691	grd-14	GRounDhog (hedgehog-like family)	NC_003284.9:8500037-8500921	565.305	23.6882	4.57679	up	5e-05	0.00110206
gene38525	Y75B12A.2	Uncharacterized protein	NC_003283.11:15109576-15110345	0	2.92166	-	down	5e-05	0.00110206
gene45735	nspc-16	Nematode Specific Peptide family, grodown C	NC_003284.9:14523602-14523956	882.644	134.314	2.71623	up	0.00615	0.0382854
gene38633	ZK1037.13	Uncharacterized protein	NC_003283.11:15318960-15320353	0	4.15985	-	down	5e-05	0.00110206
gene2744	rsa-1	Regulator of Spindle Assembly	NC_003279.8:10185877-10187472	60.051	177.412	-1.56284	down	0.00085	0.0100071
gene8028	C14A4.9	Uncharacterized protein	NC_003280.10:10599344-10600443	197.9	7.67458	4.68854	up	0.0015	0.0151584
gene8644	F15A4.2	Uncharacterized protein	NC_003280.10:12462554-12464004	1.16547	18.653	-4.00042	down	0.00845	0.0466398
gene7745	ZK1321.1	Uncharacterized protein	NC_003280.10:9754029-9754923	1.34404	0	-	up	0.0068	0.0406502
gene36470	Y32F6A.4	Uncharacterized protein	NC_003283.11:10428968-10433585	115.964	30.8613	1.9098	up	5e-05	0.00110206
gene41839	F35A5.4	Uncharacterized protein	NC_003284.9:3789884-3792806	23.8544	0.65565	5.18519	up	0.007	0.0412793
gene2644	ztf-11	Zinc finger putative Transcription Factor family	NC_003279.8:9904395-9910527	1.86095	23.5121	-3.65929	down	0.0002	0.00345935
gene5611	dos-2	Delta and OSM-11-like	NC_003280.10:3976289-3977969	20.4536	0	-	up	5e-05	0.00110206
gene3936	hmg-6	HMG	NC_003279.8:14059419-14060817	0	4.43279	-	down	0.00255	0.0213614
gene3158	col-65	COLlagen	NC_003279.8:11489229-11490560	403.01	16.42	4.61729	up	5e-05	0.00110206
gene2539	T05F1.2	Uncharacterized protein	NC_003279.8:9622621-9624606	78.222	202.158	-1.36984	down	0.00115	0.0125072
gene9037	Y39G8B.10	Uncharacterized protein	NC_003280.10:13982112-13983009	18.4653	0	-	up	5e-05	0.00110206
gene2665	sqv-5	SQuashed Vulva	NC_003279.8:9948202-9952740	37.8914	118	-1.63885	down	0.0002	0.00345935
gene5566	F54D10.5	Uncharacterized protein	NC_003280.10:3807311-3808170	34.9821	103.923	-1.57082	down	0.0095	0.0499059
gene38557	clec-47	C-type LECtin	NC_003283.11:15175761-15176290	801.926	274.745	1.54538	up	0.00155	0.0155028
gene6868	msra-1	Methionine Sulfoxide Reductase A	NC_003280.10:7363276-7364033	975.323	102.55	3.24955	up	5e-05	0.00110206
gene44345	C39B10.7	Uncharacterized protein	NC_003284.9:10477060-10477603	6.57942	0	-	up	0.00015	0.0027619
gene18843	F49C12.14	Uncharacterized protein	NC_003282.8:9322525-9324075	53.1032	11.2365	2.2406	up	0.0079	0.0446767
gene3778	fbxb-66	F-box B protein	NC_003279.8:13424030-13425122	0	25.9326	-	down	5e-05	0.00110206
gene19782	prx-2	PeRoXisome assembly factor	NC_003282.8:11644200-11646190	182.127	72.6233	1.32644	up	0.00625	0.0387332
gene37983	F35E12.10	Uncharacterized protein	NC_003283.11:13745789-13748350	20.2429	370.63	-4.19449	down	5e-05	0.00110206
gene35216	C13F10.6	Uncharacterized protein	NC_003283.11:7219213-7220979	37.6101	90.6078	-1.26851	down	0.0079	0.0446767
gene21057	Y45F10D.2	Uncharacterized protein	NC_003282.8:13773713-13774646	8.98337	0	-	up	5e-05	0.00110206
gene33352	T10B5.10	Uncharacterized protein	NC_003283.11:1852448-1856258	21.6417	1.66286	3.70208	up	0.00365	0.0271788
gene19687	memi-3	MEiosis-to-MItosis transition associated	NC_003282.8:11402156-11403337	42.5717	171.83	-2.01301	down	5e-05	0.00110206
gene1063	W03G9.9	Uncharacterized protein	NC_003279.8:4970422-4972226	1.2799	0	-	up	0.0008	0.00954063
gene37698	T16G1.2	Uncharacterized protein	NC_003283.11:12929486-12932830	20.4857	1.54008	3.73354	up	0.00895	0.0479293
gene33572	gst-10	Glutathione S-transferase P 10	NC_003283.11:2561705-2564575	223.747	37.896	2.56175	up	0.0002	0.00345935
gene4731	fbxb-20	F-box B protein	NC_003280.10:1649199-1650169	0	9.94752	-	down	5e-05	0.00110206
gene36882	mam-4	MAM (Meprin, A5-protein, PTPmu) domain protein	NC_003283.11:11248392-11250756	7.75746	0.709401	3.45091	up	0.00475	0.0321057
gene5668	fbxc-44	F-box C protein	NC_003280.10:4236544-4237737	57.8403	147.084	-1.34649	down	0.0095	0.0499059
gene8510	mex-1	Muscle EXcess	NC_003280.10:11968648-11971951	32.2231	227.898	-2.82222	down	5e-05	0.00110206
gene34935	acs-1	fatty Acid CoA Synthetase family	NC_003283.11:6525094-6531664	83.811	35.7315	1.22994	up	0.00545	0.0354058
gene43500	C18A11.3	Uncharacterized protein	NC_003284.9:8061130-8065594	43.668	3.99786	3.44927	up	0.0025	0.0211243
gene13644	C23H5.8	Uncharacterized protein	NC_003282.8:2111946-2113354	555.193	78.0213	2.83105	up	5e-05	0.00110206
gene38983	F14H3.4	Uncharacterized protein	NC_003283.11:16054140-16055055	5.56773	67.784	-3.60578	down	0.00065	0.0083666
gene12574	rsa-2	Regulator of spindle assembly protein 2	NC_003281.10:11063555-11068652	18.2601	58.736	-1.68555	down	5e-05	0.00110206
gene11400	hmg-4	FACT complex subunit SSRP1-A	NC_003281.10:7379280-7381595	35.5299	90.8723	-1.35481	down	0.00195	0.0181441
gene23269	LLC1.2	Uncharacterized protein	NC_003282.8:14456999-14464031	434.292	84.124	2.36808	up	5e-05	0.00110206
gene14132	clec-73	C-type LECtin	NC_003282.8:3954083-3956190	40.7486	12.7633	1.67475	up	0.00595	0.037463
gene36163	ZK287.4	Uncharacterized protein	NC_003283.11:9680374-9685659	4.31424	0.609207	2.8241	up	0.0049	0.0329045
gene2347	ZK858.8	Uncharacterized protein	NC_003279.8:9124727-9126086	45.6996	10.6815	2.09707	up	0.00765	0.0438016
gene18734	C53D6.10	Uncharacterized protein	NC_003282.8:9033634-9034206	82.0655	14.1084	2.54022	up	0.00685	0.0408311
gene1540	cdc-25.1	M-phase inducer phosphatase cdc-25.1	NC_003279.8:6469811-6471902	73.8175	190.897	-1.37076	down	0.0011	0.012147
gene10225	C14B1.2	Uncharacterized protein	NC_003281.10:3702326-3703070	74.147	309.104	-2.05963	down	0.0003	0.00471148
gene5741	K07E1.1	1,2-dihydroxy-3-keto-5-methylthiopentene dioxygenase homolog 2	NC_003280.10:4551100-4551910	421.587	68.1028	2.63004	up	0.00015	0.0027619
gene18735	C53D6.7	Galectin	NC_003282.8:9034925-9037162	60.987	15.6497	1.96236	up	0.0028	0.0226976
gene42038	C52B9.8	Uncharacterized protein	NC_003284.9:4298094-4303184	3.60315	12.2581	-1.7664	down	0.0024	0.0206697
gene43713	utx-1	human UTX (Ubiquitously transcribed TPR on X) homolog	NC_003284.9:8557179-8562873	2.34393	13.1471	-2.48775	down	0.0011	0.012147
gene8413	VF13D12L.3	Uncharacterized protein	NC_003280.10:11706044-11713495	275.834	78.5471	1.81217	up	0.00035	0.00529575
gene37273	mans-2	Mannosyl-oligosaccharide 1,2-alpha-mannosidase C52E4.5	NC_003283.11:11983142-11986115	64.2853	16.0629	2.00075	up	0.0004	0.00586466
gene42	puf-10	-	NC_003279.8:212255-215491	13.8069	69.5442	-2.33254	down	0.00045	0.00637744
gene5674	C01F1.5	Uncharacterized protein	NC_003280.10:4279788-4281828	41.1244	1.49139	4.78526	up	0.002	0.0184435
gene14130	clec-72	C-type LECtin	NC_003282.8:3944815-3947281	74.9297	1.75586	5.41528	up	0.0004	0.00586466
gene7893	tts-2	Unclassified non-coding RNA tts-2	NC_003280.10:10201124-10202230	180.352	23.5263	2.93847	up	5e-05	0.00110206
gene40346	Y43F8C.13	Uncharacterized protein	NC_003283.11:19693987-19697386	42.1807	10.8765	1.95537	up	0.0061	0.03806
gene13924	W08E12.6	Uncharacterized protein	NC_003282.8:3298628-3299687	5.17591	0	-	up	5e-05	0.00110206
gene19747	F12F6.7	Probable DNA polymerase delta small subunit	NC_003282.8:11558897-11561832	67.4053	155.728	-1.2081	down	0.0069	0.0409522
gene39313	tni-3	Troponin I 3	NC_003283.11:16833315-16839071	185.694	50.011	1.89261	up	0.0006	0.00788238
gene37692	lipl-1	Lipase	NC_003283.11:12920006-12921594	33.3353	3.23487	3.36527	up	0.0017	0.0164851
gene11653	C02F5.14	Uncharacterized protein	NC_003281.10:8234616-8235458	372.445	71.4686	2.38165	up	0.0058	0.0368834
gene3494	nlp-39	Neuropeptide-Like Protein	NC_003279.8:12461655-12461895	0	191.826	-	down	0.00015	0.0027619
gene5161	ptc-3	Protein patched homolog 3	NC_003280.10:2845615-2852512	42.0911	13.0396	1.69061	up	0.00035	0.00529575
gene33183	T21H3.1	Uncharacterized protein	NC_003283.11:1176724-1178825	1577.06	414.455	1.92795	up	5e-05	0.00110206
gene6244	msp-64	Major sperm protein 19/31/40/45/50/51/53/59/61/65/81/113/142	NC_003280.10:5809946-5810330	500.424	117.179	2.09443	up	0.00175	0.0168417
gene35475	C37C3.10	Uncharacterized protein	NC_003283.11:7862337-7863070	0	146.863	-	down	5e-05	0.00110206
gene1872	C26C6.10	Uncharacterized protein	NC_003279.8:7512917-7513726	5.97881	0	-	up	0.00235	0.0203769
gene2452	F46A9.1	Uncharacterized protein	NC_003279.8:9457896-9458805	143.919	18.1716	2.9855	up	0.00165	0.0162477
gene12372	R01H10.7	Uncharacterized protein	NC_003281.10:10262194-10267381	13.0821	39.2496	-1.58508	down	0.00175	0.0168417
gene8574	Y57A10A.31	Uncharacterized protein	NC_003280.10:12289404-12300073	22.152	63.2482	-1.51359	down	0.0009	0.010484
gene6708	C44B7.5	Uncharacterized protein	NC_003280.10:6871454-6872582	123.155	690.711	-2.4876	down	5e-05	0.00110206
gene37977	dct-17	DAF-16/FOXO Controlled, germline Tumor affecting	NC_003283.11:13727812-13730773	9.5698	1.21156	2.98163	up	0.00465	0.0317539
gene34201	neg-1	Negative Effect on Gut development	NC_003283.11:4373925-4374846	90.715	306.926	-1.75848	down	0.0026	0.0216488
gene33365	srp-3	SeRPin	NC_003283.11:1908908-1910590	17.7566	2.70125	2.71666	up	0.0085	0.0467444
gene9032	Y39G8B.1	Uncharacterized protein	NC_003280.10:13970641-13972943	133.828	54.3638	1.29966	up	0.0069	0.0409522
gene42797	C14F11.6	Uncharacterized protein	NC_003284.9:6238230-6239058	239.915	34.7147	2.7889	up	0.0001	0.00197766
gene12415	H04D03.2	Uncharacterized protein	NC_003281.10:10439491-10442405	10.5095	40.8842	-1.95985	down	0.00815	0.0456538
gene38196	F14D7.2	Uncharacterized protein	NC_003283.11:14292040-14293706	10.5577	81.3096	-2.94514	down	5e-05	0.00110206
gene21059	Y45F10D.16	Uncharacterized protein	NC_003282.8:13776868-13777134	94.3437	0	-	up	0.0068	0.0406502
gene43312	apy-1	APYrase	NC_003284.9:7568267-7569720	192.931	84.1496	1.19706	up	0.0058	0.0368834
gene43601	R09F10.1	Uncharacterized protein	NC_003284.9:8323643-8324995	56.9865	9.92425	2.52159	up	0.0013	0.0137063
gene34701	srsx-18	Serpentine Receptor, class SX	NC_003283.11:5922544-5924297	1.13503	0	-	up	0.0001	0.00197766
gene15424	swsn-6	SWI/SNF nucleosome remodeling complex component	NC_003282.8:5394939-5396718	47.398	114.288	-1.26977	down	0.00425	0.0300001
gene2190	sig-7	Uncharacterized protein	NC_003279.8:8646450-8651589	51.799	133.688	-1.36787	down	0.0027	0.0221472
gene725	D1037.1	Uncharacterized protein	NC_003279.8:3684801-3690047	9.14919	29.4306	-1.6856	down	0.00185	0.0174989
gene20255	ZK896.5	Uncharacterized protein	NC_003282.8:12877003-12879630	74.2031	490.043	-2.72336	down	5e-05	0.00110206
gene4765	F45C12.17	Uncharacterized protein	NC_003280.10:1726140-1726877	0	6.86026	-	down	5e-05	0.00110206
gene37091	sas-5	Spindle assembly abnormal protein 5	NC_003283.11:11610778-11612475	50.5003	115.923	-1.1988	down	0.00775	0.0441451
gene9062	lem-2	LEM protein 2	NC_003280.10:14063454-14065858	34.3094	83.7656	-1.28776	down	0.00735	0.0426146
gene13445	perm-2	PERMeable eggshell	NC_003282.8:1126800-1128752	613.101	3012.34	-2.29669	down	5e-05	0.00110206
gene2518	K07A1.1	Uncharacterized protein	NC_003279.8:9582765-9583461	116.429	340.037	-1.54625	down	0.00275	0.0224019
gene9511	T17H7.7	Uncharacterized protein	NC_003281.10:755563-758075	101.923	12.4574	3.0324	up	5e-05	0.00110206
gene34033	C17E7.9	Uncharacterized protein	NC_003283.11:3889382-3890861	6.31577	52.8444	-3.06472	down	0.00095	0.0109508
gene41108	meg-4	Uncharacterized protein	NC_003284.9:1682955-1686208	2.57003	24.4508	-3.25002	down	0.0002	0.00345935
gene33883	T20D4.17	-	NC_003283.11:3395274-3395966	1.57194	0	-	up	0.00015	0.0027619
gene43780	F53A9.6	Uncharacterized protein	NC_003284.9:8713543-8713804	870.48	5285	-2.60202	down	0.0002	0.00345935
gene2805	blmp-1	B lymphocyte-induced maturation protein 1 homolog	NC_003279.8:10409358-10413846	23.8535	6.26912	1.92787	up	0.004	0.028838
gene8839	mltn-1	MLt-TeN (mlt-10) related	NC_003280.10:13139478-13145310	38.6058	5.46707	2.81998	up	0.00035	0.00529575
gene9318	gst-26	Glutathione S-Transferase	NC_003280.10:15163864-15164543	141.335	8.72366	4.01804	up	0.00055	0.00740175
gene11280	ubc-18	UBiquitin Conjugating enzyme	NC_003281.10:7067866-7068540	461.281	1074.39	-1.2198	down	0.00605	0.0379052
gene45352	C29F7.2	Uncharacterized protein	NC_003284.9:13416083-13418101	146.085	42.0199	1.79767	up	0.00075	0.00925093
gene2474	klp-16	Kinesin-like protein	NC_003279.8:9512525-9514514	57.7272	170.533	-1.56272	down	0.00045	0.00637744
gene36138	T06E4.8	Uncharacterized protein	NC_003283.11:9622223-9622934	211.998	7.15209	4.88954	up	0.00095	0.0109508
gene4793	C08F1.10	Uncharacterized protein	NC_003280.10:1785329-1786265	0	51.4099	-	down	5e-05	0.00110206
gene20268	K08D8.3	Uncharacterized protein	NC_003282.8:12904195-12906594	38.1497	3.09671	3.62286	up	0.00065	0.0083666
gene2643	lsl-1	LSY-2-Like	NC_003279.8:9901278-9902826	75.3713	175.046	-1.21565	down	0.00855	0.0468481
gene34470	C10G8.4	Uncharacterized protein	NC_003283.11:5311934-5312280	223.014	1551.45	-2.79841	down	0.00165	0.0162477
gene18712	mltn-12	MLt-TeN (mlt-10) related	NC_003282.8:8993149-9000694	6.07369	0.496612	3.61238	up	0.0059	0.0372758
gene4102	sur-2	Mediator of RNA polymerase II transcription subunit 23	NC_003279.8:14777276-14787796	8.0839	25.1597	-1.63799	down	0.00095	0.0109508
gene3598	uba-2	SUMO-activating enzyme subunit uba-2	NC_003279.8:12741604-12748587	50.4016	126.405	-1.32651	down	0.00295	0.0234992
gene42413	scav-1	SCAVenger receptor (CD36 family) related	NC_003284.9:5397761-5400570	79.3166	27.8136	1.51183	up	0.00195	0.0181441
gene19026	cav-1	Caveolin-1	NC_003282.8:9772531-9773364	14.2346	495.087	-5.12021	down	0.0001	0.00197766
gene3036	clec-97	C-type LECtin	NC_003279.8:11152718-11155369	5.06153	40.8534	-3.01281	down	0.00745	0.0430887
gene17735	anat-1	AANAT (Arylalkylamine N-AcetylTransferase) homolog	NC_003282.8:6770832-6779470	101.12	236.391	-1.22511	down	0.00805	0.0453237
gene37040	C55A6.12	Uncharacterized protein	NC_003283.11:11501443-11503125	254.141	50.9156	2.31945	up	0.00025	0.00406508
gene18503	F17E9.4	Uncharacterized protein	NC_003282.8:8348386-8349093	461.196	1658.59	-1.84651	down	0.0002	0.00345935
gene615	K09H9.5	Uncharacterized protein	NC_003279.8:3141732-3143168	94.6179	16.4739	2.52193	up	0.00345	0.0262806
gene3559	T26E3.6	Uncharacterized protein	NC_003279.8:12661268-12661668	0	16.7026	-	down	5e-05	0.00110206
gene35949	hsp-16.11	Heat shock protein Hsp-16.1/Hsp-16.11	NC_003283.11:9090114-9090604	0	2.90875	-	down	0.00045	0.00637744
gene44857	C49F5.8	Uncharacterized protein	NC_003284.9:11960144-11960982	2.20414	0	-	up	0.0068	0.0406502
gene13904	M4.1	Uncharacterized protein	NC_003282.8:3213771-3219425	32.2762	77.4984	-1.2637	down	0.00325	0.0251037
gene5056	sri-36	Serpentine Receptor, class I	NC_003280.10:2583781-2585593	0	1.8607	-	down	5e-05	0.00110206
gene33050	sru-24	Serpentine Receptor, class U	NC_003283.11:667895-671442	0	1.43457	-	down	5e-05	0.00110206
gene35538	ZC513.5	Probable Dol-P-Man:Man(7)GlcNAc(2)-PP-Dol alpha-1,6-mannosyltransferase	NC_003283.11:8035111-8039257	46.6375	119.4	-1.35624	down	0.00395	0.0286021
gene8109	Y19D2B.2	Uncharacterized protein	NC_003280.10:10923715-10924595	0	8.68738	-	down	5e-05	0.00110206
gene1762	K10D3.4	Uncharacterized protein	NC_003279.8:7135088-7139671	52.142	10.7384	2.27967	up	0.0001	0.00197766
gene10564	B0393.5	Uncharacterized protein	NC_003281.10:4765832-4776091	11.8537	2.34477	2.33782	up	0.0025	0.0211243
gene10417	R07E5.4	Uncharacterized protein	NC_003281.10:4394795-4396326	299.788	10.7726	4.79851	up	0.0003	0.00471148
gene9049	F01D5.6	Uncharacterized protein	NC_003280.10:14006510-14008471	55.9838	3.34402	4.06535	up	5e-05	0.00110206
gene5625	pqn-48	Prion-like-(Q/N-rich)-domain-bearing protein	NC_003280.10:4038962-4043053	44.8828	12.7102	1.82018	up	0.00455	0.031421
gene409	ugt-31	UDP-GlucuronosylTransferase	NC_003279.8:2333341-2338616	23.5496	3.90212	2.59338	up	0.00235	0.0203769
gene45697	F23D12.1	Uncharacterized protein	NC_003284.9:14425444-14428105	0	1.74093	-	down	0.00035	0.00529575
gene1687	C48B6.4	Uncharacterized protein	NC_003279.8:6889253-6891445	12.8868	2.44933	2.39544	up	0.00615	0.0382854
gene5961	msp-45	Major sperm protein 19/31/40/45/50/51/53/59/61/65/81/113/142	NC_003280.10:5155435-5157625	676.299	216.1	1.64596	up	0.0027	0.0221472
gene7816	psf-1	Probable DNA replication complex GINS protein PSF1	NC_003280.10:9968680-9969576	62.5107	208.35	-1.73684	down	0.0019	0.0177989
gene45488	F55F3.2	Carboxylic ester hydrolase	NC_003284.9:13760309-13763946	37.58	10.2593	1.87303	up	0.00375	0.0274906
gene37941	F53F4.15	Uncharacterized protein	NC_003283.11:13621006-13621406	41.5874	0	-	up	5e-05	0.00110206
gene13440	ost-1	SPARC	NC_003282.8:1107448-1110567	1819.74	594.386	1.61426	up	0.00115	0.0125072
gene45356	C29F7.10	Uncharacterized protein	NC_003284.9:13430344-13431046	2.74875	29.5088	-3.4243	down	0.00485	0.032635
gene7517	dnj-23	DNaJ domain (prokaryotic heat shock protein)	NC_003280.10:9107619-9108548	72.7563	198.522	-1.44815	down	0.0037	0.027342
gene4769	ceh-83	C. Elegans Homeobox	NC_003280.10:1733853-1736423	2.31473	21.8115	-3.23617	down	0.00065	0.0083666
gene5831	C33F10.8	Uncharacterized protein	NC_003280.10:4823380-4825105	12.6691	2.23396	2.50364	up	0.006	0.0376633
gene44686	T25C12.3	Uncharacterized protein	NC_003284.9:11491164-11499849	163.591	24.3423	2.74856	up	5e-05	0.00110206
gene9251	cdh-7	CaDHerin family	NC_003280.10:14843327-14850675	7.29018	0.34071	4.41934	up	0.00305	0.0239614
gene36448	abu-1	Activated in Blocked Unfolded protein response	NC_003283.11:10380425-10381785	38.4537	2.412	3.99482	up	0.0002	0.00345935
gene40510	ZC15.11	Unclassified non-coding RNA ZC15.11	NC_003283.11:20278112-20278412	47.0735	0	-	up	5e-05	0.00110206
gene44443	clc-4	CLaudin-like in Caenorhabditis	NC_003284.9:10782995-10783907	0	2.83663	-	down	0.00095	0.0109508
gene20298	F55G11.4	Uncharacterized protein	NC_003282.8:12973658-12975563	154.706	39.0188	1.98729	up	0.00055	0.00740175
gene36326	ugt-17	UDP-GlucuronosylTransferase	NC_003283.11:10102628-10104898	46.5788	8.19306	2.5072	up	0.00045	0.00637744
gene15358	gba-4	Putative glucosylceramidase 4	NC_003282.8:5344632-5350838	151.637	30.4936	2.31404	up	5e-05	0.00110206
gene7896	ref-1	REgulator of Fusion	NC_003280.10:10218472-10219736	0.647198	10.5177	-4.02246	down	0.00845	0.0466398
gene45405	cah-4	Carbonic AnHydrase	NC_003284.9:13542625-13544372	45.7542	182.294	-1.99429	down	0.00055	0.00740175
gene38288	clec-54	C-type LECtin	NC_003283.11:14476937-14478911	31.113	5.36683	2.53537	up	0.00375	0.0274906
gene8740	Y46G5A.8	Uncharacterized protein	NC_003280.10:12756352-12757635	1.89709	27.1865	-3.84104	down	0.00885	0.0475476
gene4969	B0281.5	Uncharacterized protein	NC_003280.10:2299941-2300818	2.56911	52.9896	-4.36637	down	0.00265	0.0219547
gene4008	F49B2.3	Uncharacterized protein	NC_003279.8:14311008-14312871	0	2.36488	-	down	5e-05	0.00110206
gene5259	Y25C1A.14	Uncharacterized protein	NC_003280.10:3096342-3096957	8.23666	103.479	-3.65114	down	0.0032	0.024845
gene13600	col-109	COLlagen	NC_003282.8:1817657-1820250	384.886	9.81038	5.29398	up	0.0001	0.00197766
gene37665	T07F10.1	Uncharacterized protein	NC_003283.11:12859443-12863526	61.197	27.7738	1.13973	up	0.009	0.0481347
gene19152	msd-2	Major Sperm protein Domain containing	NC_003282.8:10029082-10029412	1562.29	353.449	2.14409	up	0.0008	0.00954063
gene36374	daf-36	Cholesterol 7-desaturase	NC_003283.11:10223555-10225659	13.2302	2.11066	2.64807	up	0.0064	0.039368
gene16480	pck-3	Phosphoenolypyruvate CarboxyKinase	NC_003282.8:5896687-5899053	23.8451	6.63168	1.84625	up	0.0081	0.0455278
gene4900	F07E5.7	Uncharacterized protein	NC_003280.10:2070700-2071477	11.646	0	-	up	5e-05	0.00110206
gene36405	lys-2	LYSozyme	NC_003283.11:10280367-10281444	422.278	20.9587	4.33257	up	5e-05	0.00110206
gene32847	F11E6.3	Uncharacterized protein	NC_003282.8:17470668-17471914	673.014	263.123	1.3549	up	0.0023	0.0202726
gene6262	H41C03.3	Uncharacterized protein	NC_003280.10:5847745-5850215	18.8532	3.57159	2.40017	up	0.0026	0.0216488
gene10342	glod-4	Glyoxalase 1	NC_003281.10:4153600-4154586	50.497	144.566	-1.51746	down	0.00395	0.0286021
gene40599	Y38H6C.21	Uncharacterized protein	NC_003283.11:20554115-20555267	1.07406	0	-	up	0.00025	0.00406508
gene39166	T08G3.13	Uncharacterized protein	NC_003283.11:16448121-16449344	0.990958	0	-	up	0.0068	0.0406502
gene44965	C23H4.6	Uncharacterized protein	NC_003284.9:12235620-12240617	2.0465	10.3394	-2.33692	down	0.0013	0.0137063
gene11176	Y102E9.6	Uncharacterized protein	NC_003281.10:6735967-6736642	2.53195	0	-	up	0.00235	0.0203769
gene395	tpxl-1	TPX2 (Targeting Protein for Xenopus Klp2)-Like	NC_003279.8:2297816-2304392	63.1563	175.586	-1.47518	down	0.00555	0.0357885
gene19768	Y24F12A.3	-	NC_003282.8:11608899-11610910	0.905983	7.66232	-3.08022	down	0.00655	0.0399345
gene38060	C06B3.16	Uncharacterized protein	NC_003283.11:13931545-13931946	114.194	0	-	up	0.0008	0.00954063
gene13847	samt-1	SAM (S-Adenosyl Methionine) Transporter	NC_003282.8:2931479-2936674	78.8593	14.8721	2.40667	up	0.00015	0.0027619
gene18836	F49C12.7	Uncharacterized protein	NC_003282.8:9309275-9312927	145.691	28.9097	2.33328	up	5e-05	0.00110206
gene35881	T19A5.3	Uncharacterized protein	NC_003283.11:8939938-8944022	56.1241	3.00542	4.22298	up	0.0002	0.00345935
gene590	col-48	COLlagen	NC_003279.8:3006028-3013445	470.485	13.8852	5.08253	up	0.0075	0.043272
gene10578	pal-1	Homeobox protein pal-1	NC_003281.10:4805210-4808708	66.7474	264.726	-1.98772	down	0.0001	0.00197766
gene19507	Y69E1A.5	Uncharacterized protein	NC_003282.8:10956958-10957643	496.282	104.05	2.25388	up	5e-05	0.00110206
gene16014	C55C3.1	Uncharacterized protein	NC_003282.8:5709103-5714336	9.66272	1.25946	2.93962	up	0.0051	0.0339174
gene42857	T22E5.1	Uncharacterized protein	NC_003284.9:6412980-6413439	0	62.6982	-	down	0.005	0.0333999
gene17638	lec-11	Non-coding transcript of protein-coding gene lec-11	NC_003282.8:6588234-6590136	27.8521	189.945	-2.76972	down	5e-05	0.00110206
gene6161	F59E12.9	Uncharacterized protein	NC_003280.10:5640435-5647037	15.3311	36.4275	-1.24856	down	0.00415	0.0294575
gene40855	F13C5.5	Uncharacterized protein	NC_003284.9:605057-608485	82.3513	19.2063	2.10021	up	0.0043	0.0302499
gene44542	lpr-5	LiPocalin-Related protein	NC_003284.9:11062255-11064200	91.3601	8.71427	3.39011	up	5e-05	0.00110206
gene3846	lagr-1	Probable ceramide synthase lagr-1	NC_003279.8:13724670-13731990	13.1727	1.62197	3.02173	up	0.0064	0.039368
gene18799	C46C2.5	Uncharacterized protein	NC_003282.8:9191680-9192622	18.5377	83.1212	-2.16476	down	0.00485	0.032635
gene46410	K05G3.1	Uncharacterized protein	NC_003284.9:16501331-16501943	0.974159	0	-	up	0.00235	0.0203769
gene45807	F40E10.5	Uncharacterized protein	NC_003284.9:14701862-14703520	101.07	2.6111	5.27456	up	0.0014	0.0144568
gene3147	ZK1025.3	Uncharacterized protein	NC_003279.8:11461063-11463052	44.9054	1.19943	5.22646	up	0.00385	0.0280498
gene11576	lin-36	Protein lin-36	NC_003281.10:8017121-8020870	26.0977	57.2738	-1.13395	down	0.0071	0.041617
gene35962	F21C10.7	Uncharacterized protein	NC_003283.11:9112789-9122047	19.6835	5.02561	1.96962	up	0.00025	0.00406508
gene35199	ugt-41	UDP-GlucuronosylTransferase	NC_003283.11:7161246-7163565	61.749	17.4506	1.82314	up	0.00205	0.018779
gene742	inx-13	Innexin	NC_003279.8:3748749-3753905	100.552	41.4657	1.27795	up	0.00915	0.0487323
gene34369	F26G5.1	Uncharacterized protein	NC_003283.11:4975493-4977424	3.94828	27.8647	-2.81914	down	0.0004	0.00586466
gene9263	R03C1.1	Uncharacterized protein	NC_003280.10:14907598-14910401	23.3816	1.04453	4.48445	up	0.0046	0.0315165
gene1553	glh-2	ATP-dependent RNA helicase glh-2	NC_003279.8:6514020-6517307	43.8111	105.001	-1.26103	down	0.00295	0.0234992
gene5153	K12H6.5	Uncharacterized protein	NC_003280.10:2825661-2826598	0.88466	0	-	up	0.0068	0.0406502
gene43897	nep-22	NEPrilysin metallopeptidase family	NC_003284.9:9034582-9038376	59.8195	26.094	1.1969	up	0.00815	0.0456538
gene143	Y18H1A.9	Uncharacterized protein	NC_003279.8:748483-756925	27.7669	1.52499	4.18649	up	0.00075	0.00925093
gene10400	mnp-1	Matrix non-peptidase homolog 1	NC_003281.10:4356683-4364593	6.88333	21.7299	-1.6585	down	0.00825	0.0459496
gene35386	C50E3.13	Uncharacterized protein	NC_003283.11:7622525-7624152	4.80871	26.326	-2.45277	down	0.00305	0.0239614
gene4157	F31C3.3	Uncharacterized protein	NC_003279.8:15041884-15050679	14.9401	38.3826	-1.36126	down	0.0008	0.00954063
gene14791	T28H11.7	Uncharacterized protein	NC_003282.8:5015319-5016208	99.9284	21.3588	2.22606	up	0.0064	0.039368
gene4188	F23F1.5	Snurportin-1	NC_003280.10:30115-31574	67.7021	173.042	-1.35385	down	0.0044	0.0306795
gene19374	nkb-2	Na+/K+ ATPase, Beta subunit	NC_003282.8:10590956-10592978	35.7974	10.1188	1.82281	up	0.00855	0.0468481
gene19401	fmo-2	Dimethylaniline monooxygenase [N-oxide-forming	NC_003282.8:10682551-10684326	125.952	21.2446	2.56771	up	0.00025	0.00406508
gene40387	clec-258	C-type LECtin	NC_003283.11:19788703-19789281	0	1.35924	-	down	0.00415	0.0294575
gene46192	lin-15B	Protein lin-15B	NC_003284.9:15726134-15731611	4.30802	24.8491	-2.5281	down	5e-05	0.00110206
gene842	R12E2.6	Uncharacterized protein	NC_003279.8:4151207-4151746	96.2038	0	-	up	0.0068	0.0406502
gene6883	K02A2.5	Uncharacterized protein	NC_003280.10:7411188-7411904	0	7.19735	-	down	0.0087	0.0470932
gene38984	F14H3.5	Uncharacterized protein	NC_003283.11:16056085-16057037	2.1012	24.7463	-3.55792	down	0.00475	0.0321057
gene9901	C39B5.2	Uncharacterized protein	NC_003281.10:2233887-2236913	0.972314	31.3839	-5.01246	down	0.0011	0.012147
gene4557	dlhd-1	DieneLactone Hydrolase Domain containing protein	NC_003280.10:1169839-1172084	68.6749	6.27512	3.45207	up	0.0004	0.00586466
gene35133	C33G8.13	Uncharacterized protein	NC_003283.11:7014613-7015922	1.30633	0	-	up	5e-05	0.00110206
gene2310	F36F2.1	Uncharacterized protein	NC_003279.8:9018733-9020169	140.75	26.9927	2.38249	up	0.00095	0.0109508
gene4860	ZK250.15	-	NC_003280.10:1946963-1947930	0	2.0634	-	down	5e-05	0.00110206
gene8548	Y57A10A.13	Uncharacterized protein	NC_003280.10:12177119-12184847	39.776	87.1535	-1.13166	down	0.0062	0.0384809
gene13745	Y69A2AR.25	Uncharacterized protein	NC_003282.8:2565840-2568367	0	1.15881	-	down	0.0001	0.00197766
gene18792	pcp-2	Prolyl Carboxy Peptidase like	NC_003282.8:9160895-9165122	34.133	3.07592	3.47207	up	0.0001	0.00197766
gene43795	zig-12	2 (Zwei) IG domain protein	NC_003284.9:8763908-8766050	682.974	93.4747	2.86918	up	5e-05	0.00110206
gene857	R12E2.1	Uncharacterized protein	NC_003279.8:4182220-4184915	25.5455	70.4852	-1.46425	down	0.0027	0.0221472
gene1856	spe-4	Presenilin spe-4	NC_003279.8:7454713-7456814	33.8948	9.10693	1.89603	up	0.00795	0.0449441
gene37906	C56A3.4	Uncharacterized protein	NC_003283.11:13550713-13551707	37.8944	139.996	-1.88533	down	0.0027	0.0221472
gene35749	vps-60	related to yeast Vacuolar Protein Sorting factor	NC_003283.11:8605255-8606125	171.338	418.936	-1.28988	down	0.00375	0.0274906
gene43442	C39D10.8	Uncharacterized protein	NC_003284.9:7880101-7880674	207.472	26.1937	2.98562	up	0.0017	0.0164851
gene13470	W09G12.10	Uncharacterized protein	NC_003282.8:1219441-1221148	17.7381	0	-	up	0.00025	0.00406508
gene14230	col-34	Cuticle collagen 34	NC_003282.8:4243585-4244587	75.7841	11.8079	2.68215	up	0.0002	0.00345935
gene14157	W03D2.6	-	NC_003282.8:4056585-4058243	38.816	5.1331	2.91875	up	0.0009	0.010484
gene30708	zip-7	Non-coding transcript of protein-coding gene zip-7	NC_003282.8:16503452-16505669	0	32.3557	-	down	5e-05	0.00110206
gene5323	fbxc-50	F-box C protein	NC_003280.10:3246372-3248118	20.1404	69.6702	-1.79045	down	0.0045	0.0311798
gene45693	F23D12.10	Uncharacterized protein	NC_003284.9:14413710-14415656	0.625046	6.25784	-3.32363	down	0.00645	0.0395579
gene35039	ZC404.15	Uncharacterized protein	NC_003283.11:6780672-6783128	0	2.30325	-	down	0.00015	0.0027619
gene7289	cht-2	CHiTinase	NC_003280.10:8520929-8523437	13.6763	0.752737	4.18339	up	0.0026	0.0216488
gene1449	vet-1	Very Early Transcript	NC_003279.8:6201024-6202066	1.84081	58.4843	-4.98964	down	0.00055	0.00740175
gene42306	acn-1	Inactive angiotensin-converting enzyme-related protein	NC_003284.9:5092841-5097067	72.6732	7.0684	3.36197	up	5e-05	0.00110206
gene12621	smc-3	Structural maintenance of chromosomes protein 3	NC_003281.10:11290941-11305900	25.8413	58.5227	-1.17932	down	0.00845	0.0466398
gene44988	W06D11.3	Uncharacterized protein	NC_003284.9:12298690-12299300	24.9985	179.214	-2.84176	down	0.00205	0.018779
gene18537	T01B11.2	Non-coding transcript of protein-coding gene T01B11.2b	NC_003282.8:8449457-8451752	70.0852	27.8623	1.3308	up	0.00575	0.0366781
gene36410	col-150	COLlagen	NC_003283.11:10293633-10294606	117.233	7.80704	3.90846	up	5e-05	0.00110206
gene13087	T27E9.6	Uncharacterized protein	NC_003281.10:13475459-13476107	0	1.82393	-	down	0.00035	0.00529575
gene4870	math-20	MATH (meprin-associated Traf homology) domain containing	NC_003280.10:1996555-1998472	29.661	9.49486	1.64335	up	0.0086	0.0469976
gene3276	dhhc-2	Palmitoyltransferase	NC_003279.8:11836589-11849160	19.5397	4.25673	2.19859	up	0.00815	0.0456538
gene44986	W06D11.1	Uncharacterized protein	NC_003284.9:12293766-12295311	8.67705	40.5969	-2.22609	down	0.00765	0.0438016
gene43413	gpx-7	Glutathione peroxidase	NC_003284.9:7799038-7799780	104.351	4.97305	4.39116	up	0.0014	0.0144568
gene8069	ect-2	ECT2 (mammalian Rho GEF) homolog	NC_003280.10:10778941-10783265	26.6221	62.2845	-1.22625	down	0.00355	0.0267227
gene10774	W03A5.1	Uncharacterized protein	NC_003281.10:5408130-5413054	10.3183	2.21761	2.21813	up	0.00825	0.0459496
gene35012	sna-1	Small Nuclear RNA (snRNA) Associated protein	NC_003283.11:6709695-6710485	90.3543	223.859	-1.30893	down	0.0075	0.043272
gene34095	K09D9.1	Uncharacterized protein	NC_003283.11:4025103-4026141	6.67938	51.7685	-2.95429	down	0.0013	0.0137063
gene5723	W06B4.1	Uncharacterized protein	NC_003280.10:4471400-4473333	50.211	183.306	-1.86818	down	0.00015	0.0027619
gene13207	Y38C1AA.19	Uncharacterized protein	NC_003282.8:160163-161663	2.99779	0	-	up	0.00015	0.0027619
gene9892	C39B5.5	Cystatin	NC_003281.10:2208269-2211186	368.702	22.6015	4.02797	up	5e-05	0.00110206
gene22292	F02H6.2	Uncharacterized protein	NC_003282.8:14196496-14198490	3.15133	20.6516	-2.71222	down	0.00235	0.0203769
gene18452	gpx-6	Non-coding transcript of protein-coding gene gpx-6	NC_003282.8:8222231-8223390	37.3996	5.97306	2.64648	up	0.00915	0.0487323
gene19808	alg-3	Argonaute (plant)-Like Gene	NC_003282.8:11704364-11708169	32.8172	11.5924	1.50127	up	0.00475	0.0321057
gene43278	F48E3.4	Uncharacterized protein	NC_003284.9:7493933-7495564	72.1503	336.091	-2.21977	down	5e-05	0.00110206
gene37119	F46F3.3	Uncharacterized protein	NC_003283.11:11667514-11669321	112.863	2.6625	5.40565	up	0.0085	0.0467444
gene9090	Y48B6A.5	Major sperm protein	NC_003280.10:14172935-14175174	30.3032	6.37966	2.24792	up	0.0037	0.027342
gene37621	papl-1	Purple acid phosphatase	NC_003283.11:12757699-12759760	155.164	17.9508	3.11167	up	5e-05	0.00110206
gene32841	F11E6.7	Uncharacterized protein	NC_003282.8:17457975-17461270	20.9869	73.3981	-1.80625	down	5e-05	0.00110206
gene43280	F48E3.6	Uncharacterized protein	NC_003284.9:7501695-7502508	0	44.1941	-	down	5e-05	0.00110206
gene9378	pals-24	Protein containing ALS2cr12 (ALS2CR12) domain	NC_003281.10:120491-124641	60.3781	20.2963	1.57281	up	0.0082	0.0458099
gene35025	T25F10.3	Uncharacterized protein	NC_003283.11:6745134-6748239	54.3349	14.4243	1.91337	up	0.0019	0.0177989
gene2443	C17E4.10	Uncharacterized protein	NC_003279.8:9435464-9440765	37.9761	96.996	-1.35283	down	0.0048	0.0324039
gene33678	ifc-1	Intermediate filament protein ifc-1	NC_003283.11:2881394-2883578	112.599	0.766041	7.19956	up	0.0006	0.00788238
gene46720	ND2	-	NC_001328.1:3417-4266	141.086	41.3169	1.77177	up	0.0046	0.0315165
gene7743	nos-3	NanOS related	NC_003280.10:9746733-9749870	30.9686	68.0786	-1.1364	down	0.005	0.0333999
gene36383	fipr-6	FIP (Fungus-Induced Protein) Related	NC_003283.11:10231267-10231536	155.17	0	-	up	0.00235	0.0203769
gene45380	tre-4	Trehalase	NC_003284.9:13472154-13475854	15.8931	2.59933	2.61219	up	0.0024	0.0206697
gene51	Y48G1BR.1	Uncharacterized protein	NC_003279.8:254708-259155	29.4314	9.7644	1.59175	up	0.00835	0.0463662
gene4333	prp-21	yeast PRP (splicing factor) related	NC_003280.10:484868-490279	33.851	74.5971	-1.13992	down	0.00815	0.0456538
gene37326	spin-1	SPINster (Drosophila lysosomal permease) homolog	NC_003283.11:12115000-12117297	67.5819	18.2808	1.88631	up	0.0016	0.0158972
gene10239	F34D10.4	Uncharacterized protein	NC_003281.10:3736623-3739372	11.1572	38.0248	-1.76896	down	0.00115	0.0125072
gene41768	vit-3	Vitellogenin-3	NC_003284.9:3567457-3572566	27.2549	267.902	-3.29712	down	0.00015	0.0027619
gene2990	cpn-4	CalPoNin	NC_003279.8:10924339-10925746	621.391	239.83	1.37349	up	0.00415	0.0294575
gene25397	Y41E3.5	-	NC_003282.8:15007802-15008173	5.35483	0	-	up	0.0008	0.00954063
gene40866	lpr-7	LiPocalin-Related protein	NC_003284.9:656264-658424	35.9214	1.98705	4.17614	up	0.00135	0.0140456
gene3946	fbxb-56	F-box B protein	NC_003279.8:14084522-14087351	0	1.46156	-	down	0.0015	0.0151584
gene1386	haf-9	HAlF transporter (PGP related)	NC_003279.8:6081815-6085832	103.652	9.768	3.40754	up	5e-05	0.00110206
gene5473	clec-134	C-type LECtin	NC_003280.10:3580082-3581433	0	0.924734	-	down	0.00075	0.00925093
gene5571	skr-15	SKp1 Related (ubiquitin ligase complex component)	NC_003280.10:3824154-3824709	4.23795	56.2501	-3.73042	down	0.0033	0.0253951
gene41216	meg-3	Uncharacterized protein	NC_003284.9:1986652-1989605	5.25189	42.9886	-3.03304	down	5e-05	0.00110206
gene42678	inx-3	Innexin-3	NC_003284.9:5996168-5997886	14.9048	153.593	-3.36526	down	5e-05	0.00110206
gene43778	kreg-1	Protein kreg-1	NC_003284.9:8709763-8710015	0	1209.28	-	down	5e-05	0.00110206
gene7962	ZK673.1	Uncharacterized protein	NC_003280.10:10443339-10445143	219.23	21.6603	3.33932	up	0.0021	0.0190682
gene16371	C06E7.4	Uncharacterized protein	NC_003282.8:5850928-5859976	31.9848	8.71569	1.8757	up	0.00155	0.0155028
gene42819	T10E10.4	Uncharacterized protein	NC_003284.9:6314632-6322913	9.09836	0.757453	3.58638	up	0.00055	0.00740175
gene37021	nas-22	Zinc metalloproteinase nas-22	NC_003283.11:11474693-11477858	23.1684	1.75108	3.72584	up	0.0023	0.0202726
gene25689	M199.9	Uncharacterized protein	NC_003282.8:15127506-15127781	0	112.314	-	down	0.00305	0.0239614
gene42425	C25F6.7	Uncharacterized protein	NC_003284.9:5445162-5447589	133.317	6.69917	4.31473	up	5e-05	0.00110206
gene7587	mel-11	Uncharacterized protein	NC_003280.10:9358533-9368654	36.5382	77.1319	-1.07792	down	0.00755	0.0434243
gene39778	lon-8	Protein lon-8	NC_003283.11:17995539-18001360	580.805	29.607	4.29404	up	0.0001	0.00197766
gene14050	Y37E11AL.2	Uncharacterized protein	NC_003282.8:3698519-3699682	80.2647	19.4541	2.04469	up	0.0035	0.0265151
gene44982	C04B4.2	Uncharacterized protein	NC_003284.9:12283320-12284954	7.63799	60.8217	-2.99332	down	0.00035	0.00529575
gene37851	F32H5.1	Uncharacterized protein	NC_003283.11:13356198-13358002	66.1861	17.0031	1.96073	up	0.0029	0.0232014
gene37075	nhr-68	Nuclear Hormone Receptor family	NC_003283.11:11573459-11575554	224.182	35.0975	2.67523	up	5e-05	0.00110206
gene2822	ska-1	Spindle and kinetochore-associated protein 1	NC_003279.8:10473599-10474434	45.0145	156.914	-1.80151	down	0.00125	0.0133406
gene44273	C14H10.1	Uncharacterized protein	NC_003284.9:10234015-10236921	181.757	39.198	2.21316	up	5e-05	0.00110206
gene7117	DH11.2	Uncharacterized protein	NC_003280.10:8012834-8014981	181.2	44.6505	2.02083	up	0.0006	0.00788238
gene37207	hmp-1	HuMPback (dorsal lumps)	NC_003283.11:11845877-11851770	40.3785	91.6448	-1.18247	down	0.0036	0.0269886
gene19097	bed-3	Zinc finger BED domain-containing protein 3	NC_003282.8:9916546-9921537	35.053	3.01255	3.54048	up	0.0001	0.00197766
gene12174	cdk-1	Cyclin-dependent kinase 1	NC_003281.10:9747473-9748668	92.7203	298.124	-1.68496	down	0.00025	0.00406508
gene34354	C02E7.10	Uncharacterized protein	NC_003283.11:4930816-4933027	1.01902	0	-	up	0.0001	0.00197766
gene35525	Y97E10AR.8	Uncharacterized protein	NC_003283.11:8005325-8005692	19.6839	0	-	up	5e-05	0.00110206
gene2814	Y106G6H.6	Uncharacterized protein	NC_003279.8:10443849-10446043	26.165	91.8357	-1.81142	down	0.00185	0.0174989
gene6581	vps-32.1	related to yeast Vacuolar Protein Sorting factor	NC_003280.10:6589710-6590762	315.374	676.539	-1.10111	down	0.0075	0.043272
gene35131	C33G8.2	Uncharacterized protein	NC_003283.11:7009982-7012244	8.00067	66.8825	-3.06344	down	5e-05	0.00110206
gene44147	R07B1.13	Uncharacterized protein	NC_003284.9:9869855-9870361	94.0857	5.62901	4.06302	up	0.0064	0.039368
gene38168	ent-3	Equilibrative Nucleoside Transporter	NC_003283.11:14232320-14236002	20.3261	5.66953	1.84203	up	0.00705	0.0414707
gene34741	picc-1	PAC-1 interacting and coiled-coil domain-containing protein 1	NC_003283.11:6019005-6026133	34.2622	83.4637	-1.28453	down	0.00405	0.0290718
gene5651	R03H10.5	Uncharacterized protein	NC_003280.10:4169722-4170608	4.43083	0	-	up	0.0002	0.00345935
gene4754	fbxb-47	F-box B protein	NC_003280.10:1702419-1703463	0	2.3892	-	down	5e-05	0.00110206
gene2707	B0379.7	Uncharacterized protein	NC_003279.8:10072624-10074029	49.2262	16.7323	1.55679	up	0.0086	0.0469976
gene36722	F17C11.10	Uncharacterized protein	NC_003283.11:10961892-10965539	38.3894	98.8527	-1.36457	down	0.0012	0.0129489
gene44137	lec-8	Probable galaptin lec-8	NC_003284.9:9850606-9851261	486.83	1233.88	-1.34171	down	0.00205	0.018779
gene13273	Y66H1A.5	Uncharacterized protein	NC_003282.8:428250-429008	158.151	22.082	2.84036	up	0.0011	0.012147
gene18097	grl-4	GRound-Like (grd related)	NC_003282.8:7310024-7310758	219.286	32.1354	2.77058	up	5e-05	0.00110206
gene7882	F33H1.3	Uncharacterized protein	NC_003280.10:10172924-10174280	58.6813	137.218	-1.2255	down	0.0085	0.0467444
gene41225	Y102A11A.5	Uncharacterized protein	NC_003284.9:2031042-2031493	1277.51	41.7719	4.93466	up	5e-05	0.00110206
gene2052	T02E1.7	Uncharacterized protein	NC_003279.8:8208824-8210640	44.8737	10.8413	2.04933	up	0.0079	0.0446767
gene34445	Y49G5B.4	Unclassified non-coding RNA Y49G5B.4	NC_003283.11:5226573-5226952	3.16028	0	-	up	0.0046	0.0315165
gene9221	hhat-1	Homolog of Hedgehog AcylTransferase	NC_003280.10:14675262-14684296	54.1658	4.29815	3.65559	up	0.0073	0.0423989
gene3021	Y52B11A.14	-	NC_003279.8:11063471-11065373	0	23.4432	-	down	0.00625	0.0387332
gene18861	C10C5.5	Aminoacylase-1	NC_003282.8:9381514-9383115	0	5.32146	-	down	5e-05	0.00110206
gene34498	C35A11.4	Uncharacterized protein	NC_003283.11:5389563-5393016	9.97991	1.37172	2.86304	up	0.00745	0.0430887
gene43643	ced-8	Cell death abnormality protein 8	NC_003284.9:8414099-8416809	1.26911	11.8625	-3.22452	down	0.0061	0.03806
gene15389	sand-1	SAND endocytosis protein family	NC_003282.8:5366867-5368722	55.0151	135.571	-1.30115	down	0.00425	0.0300001
gene10125	ral-1	RAL (Ras-related GTPase) homolog	NC_003281.10:3311596-3317502	114.905	279.034	-1.28	down	0.00485	0.032635
gene12393	tbx-9	T-box transcription factor tbx-9	NC_003281.10:10340064-10341851	4.44451	41.9612	-3.23896	down	0.0008	0.00954063
gene6336	ZK84.1	Uncharacterized protein	NC_003280.10:6020653-6023221	93.3592	5.86062	3.99367	up	5e-05	0.00110206
gene18009	cyn-12	Peptidyl-prolyl cis-trans isomerase	NC_003282.8:7132223-7133214	150.827	426.029	-1.49805	down	0.0025	0.0211243
gene8493	vps-15	related to yeast Vacuolar Protein Sorting factor	NC_003280.10:1190up-11915845	17.1501	42.6114	-1.31302	down	0.00695	0.0411163
gene40847	nas-38	Zinc metalloproteinase nas-38	NC_003284.9:558189-563629	22.0113	1.06546	4.3687	up	0.0024	0.0206697
gene46574	sod-3	Sdowneroxide dismutase [Mn	NC_003284.9:17087881-17094097	174.192	5.13463	5.08428	up	0.0003	0.00471148
gene6601	T19D12.4	Uncharacterized protein	NC_003280.10:6631167-6636984	28.652	357.701	-3.64205	down	5e-05	0.00110206
gene42666	R07E4.5	Uncharacterized protein	NC_003284.9:5949671-5953170	3.21885	15.1208	-2.23192	down	0.00285	0.022901
gene4698	K05F6.15	-	NC_003280.10:1572521-1573300	0	8.49399	-	down	5e-05	0.00110206
gene42793	C14F11.4	Uncharacterized protein	NC_003284.9:6231126-6232972	184.693	41.1208	2.16719	up	5e-05	0.00110206
gene34	ptr-11	PaTched Related family	NC_003279.8:160403-166816	57.2383	5.86985	3.28559	up	5e-05	0.00110206
gene738	sld-2	Uncharacterized protein	NC_003279.8:3741467-3742528	40.7517	117.374	-1.52618	down	0.00405	0.0290718
gene42364	Y34B4A.6	Uncharacterized protein	NC_003284.9:5253122-5254967	536.566	105.258	2.34983	up	5e-05	0.00110206
gene45391	H06A10.1	Uncharacterized protein	NC_003284.9:13507711-13509979	25.2324	2.77919	3.18254	up	0.00415	0.0294575
gene737	larp-5	LARP (RNA binding La related protein) homolog	NC_003279.8:3733597-3740334	52.6697	140.631	-1.41687	down	0.0005	0.00687417
gene43202	spp-2	SaPosin-like Protein family	NC_003284.9:7316096-7316743	7609.6	554.236	3.77925	up	5e-05	0.00110206
gene20371	ced-3	Uncharacterized protein	NC_003282.8:13199229-13204066	36.3827	121.84	-1.74366	down	0.0005	0.00687417
gene7029	C06A8.6	Uncharacterized protein	NC_003280.10:7772614-7773865	79.8034	20.7476	1.94351	up	0.00235	0.0203769
gene9210	tag-297	Uncharacterized protein	NC_003280.10:14627629-14629999	122.12	7.96509	3.93847	up	5e-05	0.00110206
gene36679	F32D8.12	Uncharacterized protein	NC_003283.11:10888762-10890993	261.414	39.8642	2.71317	up	5e-05	0.00110206
gene14414	cyp-31A3	CYtochrome P450 family	NC_003282.8:4761059-4762787	24.2383	80.9274	-1.73934	down	0.00065	0.0083666
gene7807	C05C10.5	Uncharacterized protein	NC_003280.10:9939226-9940014	112.068	520.827	-2.21643	down	5e-05	0.00110206
gene2307	rbpl-1	Retinoblastoma Binding Protein Like	NC_003279.8:9009259-9013858	30.2098	74.1802	-1.29602	down	0.0023	0.0202726
gene41777	cgr-1	CRAL/TRIO and GOLD domain sdownpressor of activated Ras	NC_003284.9:3597420-3600455	61.0456	4.23847	3.84827	up	0.0003	0.00471148
gene8625	daf-22	Non-specific lipid-transfer protein-like 2	NC_003280.10:12423607-12425690	194.365	52.8267	1.87943	up	0.0003	0.00471148
gene10485	sel-5	Serine/threonine-protein kinase sel-5	NC_003281.10:4572115-4578427	32.1757	70.1046	-1.12354	down	0.0085	0.0467444
gene13826	clec-83	C-type LECtin	NC_003282.8:2839444-2840685	428.761	146.875	1.54558	up	0.0008	0.00954063
gene346	Y51F10.2	Uncharacterized protein	NC_003279.8:1978051-1983279	61.6692	260.609	-2.07927	down	5e-05	0.00110206
gene922	C41D11.9	TM2 domain-containing protein C41D11.9	NC_003279.8:4448727-4449774	23.4067	98.4865	-2.07301	down	0.0051	0.0339174
gene2375	F36H2.4	Uncharacterized protein	NC_003279.8:9249627-9250488	5.36258	0	-	up	0.00015	0.0027619
gene4238	T01D1.4	Uncharacterized protein	NC_003280.10:177243-179051	118.043	31.0083	1.92859	up	0.0065	0.0397321
gene18412	irld-8	Insulin/EGF-Receptor L Domain protein	NC_003282.8:8115812-8118445	21.6208	5.2866	2.03201	up	0.00895	0.0479293
gene3157	K08C9.2	Uncharacterized protein	NC_003279.8:11486952-11488395	118.192	32.9757	1.84166	up	0.00595	0.037463
gene44161	C17G1.2	Uncharacterized protein	NC_003284.9:9921557-9922766	33.7277	128.756	-1.93263	down	0.00075	0.00925093
gene7093	ptc-1	Protein patched homolog 1	NC_003280.10:7893264-7899708	77.8265	242.776	-1.64129	down	0.00055	0.00740175
gene38471	fil-1	Fasting Induced Lipase	NC_003283.11:14993930-14995053	47.9465	4.49163	3.41612	up	0.00045	0.00637744
gene42978	slc-25A10	SLC (SoLute Carrier) homolog	NC_003284.9:6723991-6725660	187.766	76.825	1.28928	up	0.007	0.0412793
gene34599	pqn-13	Prion-like-(Q/N-rich)-domain-bearing protein	NC_003283.11:5670014-5676082	25.82	1.8196	3.82679	up	0.00075	0.00925093
gene4682	fbxb-43	F-box B protein	NC_003280.10:1536258-1537275	0	4.51022	-	down	5e-05	0.00110206
gene3735	M01E5.3	Uncharacterized protein	NC_003279.8:13281668-13286339	35.5953	81.0708	-1.18749	down	0.00925	0.0490283
gene31088	col-137	COLlagen	NC_003282.8:16601556-16602776	156.365	2.07145	6.23813	up	0.0001	0.00197766
gene8618	F57G9.3	Uncharacterized protein	NC_003280.10:12409391-12410189	0	10.1261	-	down	5e-05	0.00110206
gene20440	mam-3	MAM (Meprin, A5-protein, PTPmu) domain protein	NC_003282.8:13434299-13445266	24.4753	0.942725	4.69835	up	0.00075	0.00925093
gene4311	C24H12.7	-	NC_003280.10:419177-420568	0	6.91409	-	down	5e-05	0.00110206
gene9961	Y54F10AM.8	Putative phospholipase B-like 3	NC_003281.10:2503607-2507970	107.772	22.6924	2.2477	up	5e-05	0.00110206
gene1199	F27C1.1	Uncharacterized protein	NC_003279.8:5434090-5443026	254.269	94.3292	1.43058	up	0.00325	0.0251037
gene3634	acox-2	Acyl-coenzyme A oxidase	NC_003279.8:12942307-12946530	39.5976	2.73165	3.85757	up	0.0003	0.00471148
gene14033	ZC416.6	Uncharacterized protein	NC_003282.8:3609334-3613071	88.6515	31.0184	1.51502	up	0.0011	0.012147
gene18172	F13B6.1	Uncharacterized protein	NC_003282.8:7456792-7458035	17.373	3.58438	2.27705	up	0.00745	0.0430887
gene13936	hrp-1	Heterogeneous nuclear ribonucleoprotein A1	NC_003282.8:3337232-3338405	200.843	439.114	-1.12852	down	0.006	0.0376633
gene1444	pigv-1	GPI mannosyltransferase pigv-1	NC_003279.8:6185462-6187815	54.6382	195.653	-1.84031	down	0.0002	0.00345935
gene20368	F58D2.2	Uncharacterized protein	NC_003282.8:13189156-13193249	32.6381	10.7208	1.60615	up	0.009	0.0481347
gene1519	san-1	Uncharacterized protein	NC_003279.8:6407533-6409051	39.7759	116.1	-1.5454	down	0.0018	0.0171731
gene4094	dnj-12	DNaJ domain (prokaryotic heat shock protein)	NC_003279.8:14757078-14758432	175.627	416.898	-1.24718	down	0.0027	0.0221472
gene4313	C24H12.9	-	NC_003280.10:423623-427019	0	0.966081	-	down	5e-05	0.00110206
gene3615	mxt-1	Eukaryotic translation initiation factor 4E-binding protein Mextli homolog	NC_003279.8:12844627-12852932	29.4258	7.12578	2.04596	up	0.0015	0.0151584
gene42729	C15H9.9	Uncharacterized protein	NC_003284.9:6127623-6128275	1111.34	457.447	1.28063	up	0.0054	0.0351637
gene11802	C06E1.1	Uncharacterized protein	NC_003281.10:8605843-8606426	12.6967	78.0154	-2.6193	down	0.00225	0.0200561
gene39308	T20B3.14	Uncharacterized protein	NC_003283.11:16820691-16821316	551.942	0	-	up	0.0008	0.00954063
gene32796	tag-141	Uncharacterized protein	NC_003282.8:17364879-17366457	14.2705	1.38485	3.36523	up	0.00935	0.0493843
gene19434	T25B9.8	Uncharacterized protein	NC_003282.8:10766556-10768159	9.9787	32.5755	-1.70686	down	0.00835	0.0463662
gene15383	Y4C6B.1	Uncharacterized protein	NC_003282.8:5354491-5356324	34.7989	89.4609	-1.36222	down	0.00415	0.0294575
gene2278	F53B6.4	Major sperm protein	NC_003279.8:8947408-8948711	125.322	41.2619	1.60276	up	0.0019	0.0177989
gene5910	lrr-1	Leucine-Rich Repeat protein	NC_003280.10:5034294-5036426	46.2116	108.493	-1.23127	down	0.00855	0.0468481
gene18752	cpna-3	CoPiNe domain protein, Atypical	NC_003282.8:9096905-9099074	32.7961	97.7599	-1.57572	down	0.00255	0.0213614
gene8787	lips-9	LIPaSe related	NC_003280.10:12933976-12935357	47.5404	1.68469	4.8186	up	0.00185	0.0174989
gene36142	T06E4.12	Uncharacterized protein	NC_003283.11:9628423-9629110	195.743	16.358	3.58089	up	0.0006	0.00788238
gene34968	ZK1055.6	Uncharacterized protein	NC_003283.11:6599254-6602604	15.5358	54.9392	-1.82224	down	0.0005	0.00687417
gene1344	B0207.7	Uncharacterized protein	NC_003279.8:5945756-5947342	22.9515	3.88482	2.56267	up	0.00575	0.0366781
gene10613	C35D10.13	Uncharacterized protein	NC_003281.10:4877716-4878310	246.239	742.096	-1.59155	down	0.0017	0.0164851
gene45912	rgs-11	Regulator of G-protein signaling rgs-11	NC_003284.9:14964612-14965758	3.53033	36.9964	-3.38951	down	0.0023	0.0202726
gene4561	lin-42	Uncharacterized protein	NC_003280.10:1234174-1252359	236.102	20.4798	3.52714	up	0.0049	0.0329045
gene10245	lec-4	Galectin	NC_003281.10:3771521-3773260	323.108	59.0897	2.45104	up	5e-05	0.00110206
gene20252	clec-187	C-type LECtin	NC_003282.8:12869355-12871480	33.536	6.66257	2.33156	up	0.00455	0.031421
gene31254	set-26	SET (trithorax/polycomb) domain containing	NC_003282.8:16647124-16655833	8.83617	23.0005	-1.38017	down	0.00375	0.0274906
gene35385	C50E3.12	Uncharacterized protein	NC_003283.11:7620655-7622029	0.855413	11.0278	-3.68838	down	0.00305	0.0239614
gene11287	ZK418.7	Uncharacterized protein	NC_003281.10:7079076-7080789	8.26015	41.1388	-2.31626	down	0.00265	0.0219547
gene43416	sek-1	Dual specificity mitogen-activated protein kinase kinase sek-1	NC_003284.9:7816803-7820063	63.4463	148.047	-1.22244	down	0.00915	0.0487323
gene2220	gska-3	Glycogen Synthase Kinase Alpha subunit	NC_003279.8:8749667-8751297	45.0005	12.2557	1.87649	up	0.0078	0.044308
gene40885	sli-1	Sdownpressor of LIneage defect	NC_003284.9:720728-725893	16.1433	54.9245	-1.76652	down	0.00125	0.0133406
gene6576	C56C10.4	Uncharacterized protein	NC_003280.10:6583076-6584368	38.3068	2.89577	3.72558	up	0.0035	0.0265151
gene18954	trcs-1	TRansport of membrane to Cell Surface	NC_003282.8:9587268-9588774	160.713	579.689	-1.85079	down	5e-05	0.00110206
gene11794	doxa-1	Dual oxidase maturation factor 1	NC_003281.10:8581146-8583301	17.4389	3.2567	2.42083	up	0.0046	0.0315165
gene40002	col-42	COLlagen	NC_003283.11:18638483-18639555	784.116	249.853	1.64999	up	0.00075	0.00925093
gene11091	atgl-1	Patanin-like phospholipase domain-containing protein	NC_003281.10:6416146-6419454	43.0387	93.2094	-1.11484	down	0.00755	0.0434243
gene5857	msp-33	Major sperm protein 33	NC_003280.10:4891587-4893485	1276.81	317.092	2.00957	up	0.00055	0.00740175
gene8782	wago-4	Piwi-like protein	NC_003280.10:12919576-12922932	22.475	52.3621	-1.2202	down	0.0055	0.0356048
gene5800	C27D9.2	Uncharacterized protein	NC_003280.10:4755680-4756765	46.5113	179.662	-1.94964	down	0.00335	0.025732
gene7322	F28C6.5	Uncharacterized protein	NC_003280.10:8599554-8600440	79.0522	8.11115	3.28483	up	0.0004	0.00586466
gene42826	col-170	COLlagen	NC_003284.9:6331708-6332611	193.618	3.72047	5.70158	up	0.00015	0.0027619
gene43302	col-174	COLlagen	NC_003284.9:7546967-7548141	37.9187	0.806881	5.55441	up	0.00425	0.0300001
gene13231	T21D12.12	Uncharacterized protein	NC_003282.8:266450-268271	148.955	45.6965	1.70472	up	0.00775	0.0441451
gene17170	C49A9.3	Uncharacterized protein	NC_003282.8:6222406-6224906	20.327	2.13941	3.24811	up	0.0004	0.00586466
gene46529	Y13C8A.2	Uncharacterized protein	NC_003284.9:16885270-16885587	0	142.857	-	down	5e-05	0.00110206
gene9051	F01D5.7	Uncharacterized protein	NC_003280.10:14008665-14010577	21.9121	2.48986	3.13759	up	0.0025	0.0211243
gene45184	C05E7.2	Uncharacterized protein	NC_003284.9:12938749-12940711	221.124	6.73748	5.0365	up	5e-05	0.00110206
gene44349	C33D3.4	Uncharacterized protein	NC_003284.9:10489062-10489775	1.00887	0	-	up	0.0068	0.0406502
gene2459	F30A10.11	Uncharacterized protein	NC_003279.8:9477477-9478098	0	56.6426	-	down	0.00015	0.0027619
gene18995	msp-76	Major sperm protein 10/36/56/76	NC_003282.8:9689014-9689398	1404.88	448.821	1.64624	up	0.00125	0.0133406
gene9478	ttr-7	TransThyretin-Related family domain	NC_003281.10:606073-606928	72.1832	7.60745	3.24618	up	0.0082	0.0458099
gene1317	F33D11.8	Uncharacterized protein	NC_003279.8:5854344-5855021	0	13.2333	-	down	0.0095	0.0499059
gene4090	hmp-2	HuMPback (dorsal lumps)	NC_003279.8:14738881-14742522	36.9745	101.507	-1.45697	down	0.00055	0.00740175
gene2236	sdown-17	Sdownpressor	NC_003279.8:8793097-8796810	33.903	96.0632	-1.50257	down	0.0005	0.00687417
gene519	W03D8.9	Uncharacterized protein	NC_003279.8:2784666-2785796	166.937	58.0415	1.52415	up	0.00255	0.0213614
gene3023	hmr-1	Cadherin-related hmr-1	NC_003279.8:11076371-11134559	31.5595	91.4964	-1.53564	down	0.00015	0.0027619
gene14297	htz-1	Histone H2A.V	NC_003282.8:4446235-4446708	437.33	1238.12	-1.50135	down	0.00165	0.0162477
gene38287	clec-56	C-type LECtin	NC_003283.11:14474518-14476780	71.8847	8.65519	3.05405	up	0.0002	0.00345935
gene5588	sdz-7	SKN-1 Dependent Zygotic transcript	NC_003280.10:3877463-3877896	0	17.1384	-	down	5e-05	0.00110206
gene13243	dsc-4	Defecation Sdownpressor of Clk-1	NC_003282.8:315118-320470	46.6471	4.72514	3.30336	up	5e-05	0.00110206
gene12883	Y49E10.18	Uncharacterized protein	NC_003281.10:12442673-12446101	125.983	12.8583	3.29246	up	0.00025	0.00406508
gene18913	ugt-21	UDP-glucuronosyltransferase	NC_003282.8:9500325-9502505	22.6713	0.774285	4.87186	up	0.0031	0.0242277
gene32218	rom-4	Rhomboid-like protein	NC_003282.8:16995821-17014586	8.46846	29.4737	-1.79926	down	0.00065	0.0083666
gene34594	hex-2	HEXosaminidase	NC_003283.11:5654477-5658573	48.672	10.4801	2.21544	up	0.00035	0.00529575
gene5431	Y49F6B.8	Uncharacterized protein	NC_003280.10:3479472-3480563	23.797	4.57473	2.37902	up	0.00835	0.0463662
gene30308	C35D6.4	Uncharacterized protein	NC_003282.8:16350989-16351601	0	5.15067	-	down	5e-05	0.00110206
gene12183	cbp-1	Protein cbp-1	NC_003281.10:9766697-9773936	19.5825	47.3232	-1.27298	down	0.002	0.0184435
gene15391	elo-5	Elongation of very long chain fatty acids protein 5	NC_003282.8:5374697-5377275	529.42	106.9	2.30815	up	5e-05	0.00110206
gene12690	ztf-29	Zinc finger putative Transcription Factor family	NC_003281.10:11561170-11562252	6.69907	30.8994	-2.20555	down	0.0075	0.043272
gene46279	mboa-1	O-acyltransferase	NC_003284.9:16030821-16034677	12.5484	2.59289	2.27487	up	0.0055	0.0356048
gene23539	T27E7.1	Uncharacterized protein	NC_003282.8:14519865-14520967	132.389	37.2734	1.82857	up	0.0026	0.0216488
gene6881	nas-7	Zinc metalloproteinase nas-7	NC_003280.10:7400724-7402707	38.6034	2.88872	3.74022	up	0.0004	0.00586466
gene9911	fbxa-42	F-box A protein	NC_003281.10:2260003-2261430	16.1477	2.49858	2.69215	up	0.00685	0.0408311
gene17666	C01B10.10	Uncharacterized protein	NC_003282.8:6624563-6627919	27.5247	6.65565	2.04807	up	0.00415	0.0294575
gene45086	col-182	COLlagen	NC_003284.9:12636152-12637056	38.1297	1.0724	5.152	up	0.0036	0.0269886
gene39073	F21H7.3	Uncharacterized protein	NC_003283.11:16232694-16233255	0	1.99749	-	down	0.0071	0.041617
gene10349	C16C10.4	Probable histone deacetylase complex subunit SAP18	NC_003281.10:4171339-4172065	215.933	582.946	-1.43278	down	0.0034	0.0259595
gene13113	aldo-1	Fructose-bisphosphate aldolase 1	NC_003281.10:13563482-13564919	264.742	92.032	1.52438	up	0.00065	0.0083666
gene5837	C33F10.12	Uncharacterized protein	NC_003280.10:4836366-4837638	59.0616	14.7194	2.0045	up	0.00525	0.0345677
gene39926	Y51A2B.9	Uncharacterized protein	NC_003283.11:18395337-18395749	14.6667	0	-	up	0.00235	0.0203769
gene6841	skpo-3	ShK domain and PerOxidase domain containing protein	NC_003280.10:7245917-7249978	65.8142	13.8053	2.25317	up	5e-05	0.00110206
gene44658	pek-1	Eukaryotic translation initiation factor 2-alpha kinase pek-1	NC_003284.9:11410574-11414811	22.2805	52.9233	-1.24812	down	0.006	0.0376633
gene19381	R09H10.6	Uncharacterized protein	NC_003282.8:10608574-10609744	34.9046	0	-	up	5e-05	0.00110206
gene785	fkb-5	Peptidyl-prolyl cis-trans isomerase	NC_003279.8:3898174-3899802	213.91	16.0852	3.7332	up	5e-05	0.00110206
gene44269	F44A6.5	Uncharacterized protein	NC_003284.9:10217491-10218724	112.034	19.0667	2.5548	up	0.0026	0.0216488
gene9278	Y53F4B.43	Uncharacterized protein	NC_003280.10:14988530-14991310	0	5.68619	-	down	0.001	0.0113532
gene837	poml-2	PON (paraoxonase) and MEC-6 Like	NC_003279.8:4142342-4144567	21.5682	2.4989	3.10954	up	0.0017	0.0164851
gene11263	C06E8.5	Uncharacterized protein	NC_003281.10:7002408-7005289	35.1863	1.88022	4.22604	up	0.0002	0.00345935
gene11916	ZK643.2	Probable deoxycytidylate deaminase	NC_003281.10:8956572-8957574	31.2516	107.696	-1.78496	down	0.00695	0.0411163
gene46526	T20F7.1	Uncharacterized protein	NC_003284.9:16872925-16878042	6.09904	22.4242	-1.8784	down	0.0022	0.0197487
gene5302	sdz-35	SKN-1 Dependent Zygotic transcript	NC_003280.10:3207867-3208751	0	1.83127	-	down	5e-05	0.00110206
gene35990	spas-1	SPAStin (human neurodegeneration-associated AAA ATPase) related	NC_003283.11:9175802-9177832	51.6516	132.752	-1.36185	down	0.00255	0.0213614
gene3743	sdz-30	SKN-1 Dependent Zygotic transcript	NC_003279.8:13307050-13308685	1.21424	15.4189	-3.66657	down	0.00155	0.0155028
gene10008	pho-9	intestinal acid PHOsphatase	NC_003281.10:2757167-2760753	14.6728	48.9165	-1.73718	down	0.00475	0.0321057
gene2349	mel-26	Uncharacterized protein	NC_003279.8:9132542-9135242	98.3	230.487	-1.22942	down	0.0033	0.0253951
gene41996	vha-12	Probable V-type proton ATPase subunit B	NC_003284.9:4191095-4192718	271.395	128.782	1.07546	up	0.0077	0.0439814
gene41889	F47F2.3	Uncharacterized protein	NC_003284.9:3893994-3895677	1.90798	0	-	up	5e-05	0.00110206
gene38568	Y75B12B.11	Uncharacterized protein	NC_003283.11:15191308-15191836	12.8949	0	-	up	5e-05	0.00110206
gene1866	pbrm-1	PolyBRoMo domain containing	NC_003279.8:7495441-7503233	28.1325	70.8823	-1.33319	down	0.0094	0.0495694
gene42622	hog-1	HOG only (Hedgehog Hog domain alone)	NC_003284.9:5852064-5854174	39.1564	3.69417	3.40593	up	0.00575	0.0366781
gene4089	K05C4.7	Armadillo repeat-containing protein 1	NC_003279.8:14737702-14738622	59.2593	144.889	-1.28984	down	0.0073	0.0423989
gene7217	tdc-1	Tyrosine decarboxylase	NC_003280.10:8270606-8273541	55.2132	140.426	-1.34672	down	0.00165	0.0162477
gene37108	zip-10	bZIP transcription factor family	NC_003283.11:11650202-11650751	29.718	351.104	-3.56249	down	0.0004	0.00586466
gene3252	F35E2.8	Uncharacterized protein	NC_003279.8:11718910-11719790	0	2.50357	-	down	5e-05	0.00110206
gene20032	phy-2	Prolyl 4-hydroxylase subunit alpha-2	NC_003282.8:12211211-12215986	70.2544	18.1744	1.95068	up	0.00035	0.00529575
gene10913	cct-6	T-complex protein 1 subunit zeta	NC_003281.10:5853816-5855682	196.005	411.575	-1.07026	down	0.0084	0.046519
gene3344	hrp-2	human HnRNP A1 homolog	NC_003279.8:12060837-12064887	119.026	249.859	-1.06984	down	0.00885	0.0475476
gene4345	mlt-10	Uncharacterized protein	NC_003280.10:530847-551892	132.498	5.33209	4.63513	up	0.00025	0.00406508
gene9462	F30H5.3	Uncharacterized protein	NC_003281.10:505502-511917	20.0047	2.17519	3.20112	up	5e-05	0.00110206
gene10344	C01G12.16	Uncharacterized protein	NC_003281.10:4161236-4161810	0	14.2523	-	down	0.00305	0.0239614
gene18576	Y59H11AR.10	Uncharacterized protein	NC_003282.8:8603254-8603674	67.6759	0	-	up	0.00235	0.0203769
gene34103	C49G7.3	Uncharacterized protein	NC_003283.11:4046441-4047286	339.592	139.238	1.28625	up	0.004	0.028838
gene7086	perm-1	PERMeable eggshell	NC_003280.10:7880820-7882523	55.1297	154.129	-1.48324	down	0.00135	0.0140456
gene37775	acly-2	ATP-citrate synthase	NC_003283.11:13116507-13120040	57.5388	137.272	-1.25443	down	0.00145	0.014816
gene11495	snu-23	Putative zinc finger protein ZK686.4	NC_003281.10:7769214-7769966	66.0321	214.182	-1.6976	down	0.0014	0.0144568
gene4606	rog-1	Ras activating factor in development Of Germline	NC_003280.10:1369045-1374985	17.4794	51.2526	-1.55197	down	0.004	0.028838
gene8218	T06D8.3	Uncharacterized protein	NC_003280.10:11222350-11226243	28.6681	3.17546	3.17441	up	0.00095	0.0109508
gene8563	Y57A10A.23	Uncharacterized protein	NC_003280.10:12240387-12241972	1527.63	138.488	3.46346	up	5e-05	0.00110206
gene40977	C05D9.4	Uncharacterized protein	NC_003284.9:1108066-1110110	1.87919	0	-	up	0.00025	0.00406508
gene7171	tmem-138	TMEM (human TransMEMbrane protein) homolog	NC_003280.10:8157361-8157993	0	2.06402	-	down	0.0039	0.0283268
gene19209	msp-38	Major sperm protein 38	NC_003282.8:10143356-10143740	700.897	182.999	1.93737	up	0.00115	0.0125072
gene36959	col-155	Putative cuticle collagen 155	NC_003283.11:113up9-11389856	327.229	31.2859	3.38672	up	5e-05	0.00110206
gene12861	Y75B8A.33	Uncharacterized protein	NC_003281.10:12361858-12367373	0	0.874605	-	down	0.0001	0.00197766
gene43005	dhs-28	DeHydrogenases, Short chain	NC_003284.9:6818444-6819989	419.178	101.506	2.046	up	5e-05	0.00110206
gene37885	frm-10	FERM domain (protein4.1-ezrin-radixin-moesin) family	NC_003283.11:13463277-13466945	61.8597	168.599	-1.44652	down	0.0007	0.00881148
gene7550	abu-14	Activated in Blocked Unfolded protein response	NC_003280.10:9225411-9227157	350.441	13.9433	4.65152	up	5e-05	0.00110206
gene20389	ttr-51	TransThyretin-Related family domain	NC_003282.8:13250718-13252311	1353.13	6874.93	-2.34504	down	5e-05	0.00110206
gene10624	kbp-2	KNL (kinetochore null) Binding Protein	NC_003281.10:4903283-4903870	72.3491	254.163	-1.81271	down	0.0018	0.0171731
gene1380	C27A12.7	Uncharacterized protein	NC_003279.8:6056403-6058229	43.4287	110.294	-1.34464	down	0.00245	0.0209694
gene18678	rad-26	Uncharacterized protein	NC_003282.8:8894105-8901047	22.12	48.7711	-1.14068	down	0.00925	0.0490283
gene32833	F08A7.1	Uncharacterized protein	NC_003282.8:17440726-17442125	55.099	2.03332	4.76012	up	0.00585	0.037059
gene37241	F58H1.6	Uncharacterized protein	NC_003283.11:11942960-11944571	40.6814	7.80826	2.3813	up	0.0036	0.0269886
gene32759	nra-1	Nicotinic receptor-associated protein 1	NC_003282.8:17281676-17284187	28.8328	79.894	-1.47038	down	0.00185	0.0174989
gene40345	mrp-7	Uncharacterized protein	NC_003283.11:19674893-19692768	18.7706	43.2868	-1.20545	down	0.00575	0.0366781
gene2546	T05F1.8	Uncharacterized protein	NC_003279.8:9642491-9643765	38.6382	8.83294	2.12906	up	0.007	0.0412793
gene37043	C55A6.1	Uncharacterized protein	NC_003283.11:11503865-11504692	79.7381	225.471	-1.4996	down	0.0027	0.0221472
gene18026	C42D4.3	Uncharacterized protein	NC_003282.8:7179261-7180331	144.294	18.5485	2.95964	up	0.00035	0.00529575
gene10196	C48D5.3	Uncharacterized protein	NC_003281.10:3578881-3581693	14.9723	0	-	up	5e-05	0.00110206
gene13611	egl-18	Uncharacterized protein	NC_003282.8:1913471-1917360	8.1069	32.8751	-2.01977	down	0.0031	0.0242277
gene617	K09H9.2	Uncharacterized protein	NC_003279.8:3148016-3150304	30.8192	82.6346	-1.42292	down	0.00445	0.030911
gene613	col-49	COLlagen	NC_003279.8:3137208-3138411	1096.49	24.6736	5.47379	up	5e-05	0.00110206
gene6449	C29F5.1	Uncharacterized protein	NC_003280.10:6303554-6306209	106.274	29.2378	1.86188	up	0.0007	0.00881148
gene44626	inx-2	Innexin-2	NC_003284.9:11295182-11296729	4.6323	112.519	-4.6023	down	5e-05	0.00110206
gene8777	clec-66	C-type LECtin	NC_003280.10:12904418-12906545	55.5407	14.8406	1.90399	up	0.0028	0.0226976
gene33640	R05D8.9	Uncharacterized protein	NC_003283.11:2766270-2767503	12.9956	0	-	up	5e-05	0.00110206
gene3603	B0019.2	Uncharacterized protein	NC_003279.8:12773660-12782158	16.3212	39.8963	-1.28951	down	0.0091	0.0485597
gene20245	M02B1.3	Uncharacterized protein	NC_003282.8:12836525-12840024	134.177	320.669	-1.25695	down	0.0034	0.0259595
gene20190	K08E7.5	Uncharacterized protein	NC_003282.8:12573380-12578748	13.5878	0.622173	4.44885	up	0.0023	0.0202726
gene34282	F39G3.4	Uncharacterized protein	NC_003283.11:4724662-4726726	0	16.184	-	down	5e-05	0.00110206
gene11697	F10E9.12	Uncharacterized protein	NC_003281.10:8324818-8325544	14.5012	150.794	-3.37833	down	0.003	0.0237149
gene8176	nasp-1	NASP (human Nuclear Autoantigenic Sperm Protein) homolog	NC_003280.10:11106635-11107942	89.7898	193.535	-1.10797	down	0.00785	0.0445004
gene34431	abu-7	Activated in Blocked Unfolded protein response	NC_003283.11:5163395-5164759	31.4198	0.968852	5.01925	up	0.0002	0.00345935
gene33022	pqn-97	Prion-like-(Q/N-rich)-domain-bearing protein	NC_003283.11:609201-609726	4.30066	0	-	up	5e-05	0.00110206
gene5033	F53G2.2	Uncharacterized protein	NC_003280.10:2481937-2485902	0	0.797732	-	down	0.00025	0.00406508
gene37004	col-156	COLlagen	NC_003283.11:11449300-11450341	320.849	7.3541	5.4472	up	5e-05	0.00110206
gene34290	pgl-3	Uncharacterized protein	NC_003283.11:4756009-4758419	71.4393	160.079	-1.16399	down	0.0032	0.024845
gene6337	R12C12.9	Uncharacterized protein	NC_003280.10:6023549-6024974	72.3167	12.4952	2.53296	up	0.0035	0.0265151
gene10516	T23F11.2	Uncharacterized protein	NC_003281.10:4654355-4655402	59.3754	15.3821	1.94861	up	0.00545	0.0354058
gene34877	gfi-1	GEI-4 (Four) Interacting protein	NC_003283.11:6392697-6399921	51.5217	4.26003	3.59624	up	5e-05	0.00110206
gene2808	Y106G6H.1	Uncharacterized protein	NC_003279.8:10429740-10432283	32.951	5.91312	2.47833	up	0.00115	0.0125072
gene18339	C49H3.6	Uncharacterized protein	NC_003282.8:7903776-7906877	19.0133	53.7197	-1.49844	down	0.00305	0.0239614
gene19798	ZK792.4	Uncharacterized protein	NC_003282.8:11678662-11681990	11.9397	2.5782	2.21132	up	0.0083	0.0461815
gene13054	T03F6.6	Receptor expression-enhancing protein	NC_003281.10:13378477-13380294	73.2882	17.7638	2.04464	up	0.0092	0.0488728
gene35008	era-1	Embryonic mRna (mRNA) Anterior	NC_003283.11:6703086-6704401	48.5251	241.792	-2.31696	down	5e-05	0.00110206
gene39512	clec-242	C-type LECtin	NC_003283.11:17243766-17245506	2.957	0	-	up	5e-05	0.00110206
gene9448	cec-8	C.Elegans Chromodomain protein	NC_003281.10:429353-431597	1.43481	14.0334	-3.28992	down	0.0007	0.00881148
gene9692	Y82E9BL.3	Uncharacterized protein	NC_003281.10:1349751-1350836	0	2.37338	-	down	5e-05	0.00110206
gene40980	C05D9.3	Uncharacterized integrin beta-like protein C05D9.3	NC_003284.9:1111915-1116460	76.4369	14.6854	2.37989	up	0.00065	0.0083666
gene41238	F49H12.7	Uncharacterized protein	NC_003284.9:2065042-2066544	0	5.90715	-	down	5e-05	0.00110206
gene41774	T27A10.6	Uncharacterized protein	NC_003284.9:3589041-3596351	47.864	6.55664	2.86791	up	5e-05	0.00110206
gene10835	bas-1	Biogenic Amine Synthesis related	NC_003281.10:5612288-5614603	22.2503	5.09306	2.12722	up	0.0034	0.0259595
gene6250	tbc-2	TBC (Tre-2/Bub2/Cdc16) domain family	NC_003280.10:5824085-5827426	32.6254	78.4119	-1.26508	down	0.00375	0.0274906
gene5135	fbxb-111	F-box B protein	NC_003280.10:2773995-2775004	0	2.86074	-	down	5e-05	0.00110206
gene825	cyb-2.2	CYclin B	NC_003279.8:4114877-4116073	84.7174	323.007	-1.93084	down	0.0001	0.00197766
gene37779	B0365.9	Uncharacterized protein	NC_003283.11:13132018-13133479	51.5221	5.24839	3.29524	up	0.0029	0.0232014
gene32958	M02H5.8	Uncharacterized protein	NC_003283.11:450019-450381	392.252	1436.36	-1.87256	down	0.00855	0.0468481
gene45641	K06G5.1	Uncharacterized protein	NC_003284.9:14214973-14218983	455.302	184.646	1.30206	up	0.00285	0.022901
gene17661	C01B10.3	Uncharacterized protein	NC_003282.8:6619559-6621351	75.8008	28.3461	1.41906	up	0.0079	0.0446767
gene7469	tdp-1	Tar DNA-binding protein homolog 1	NC_003280.10:8997833-8999531	86.0511	229.71	-1.41655	down	0.00805	0.0453237
gene8233	T05B9.1	Uncharacterized protein	NC_003280.10:11260300-11261192	183.955	464.604	-1.33664	down	0.00175	0.0168417
gene2078	npp-2	Nuclear Pore complex Protein	NC_003279.8:8291405-8293640	78.9057	174.047	-1.14127	down	0.00515	0.0340992
gene1882	chs-1	CHitin Synthase	NC_003279.8:7555000-7559456	38.755	159.531	-2.04138	down	5e-05	0.00110206
gene13434	cct-8	T-complex protein 1 subunit theta	NC_003282.8:1087811-1093913	119.179	273.095	-1.19628	down	0.00365	0.0271788
gene7189	qua-1	Protein qua-1	NC_003280.10:8198802-8203661	42.8105	2.92984	3.86907	up	5e-05	0.00110206
gene6933	rol-8	Cuticle collagen 6	NC_003280.10:7544133-7545259	325.437	8.09113	5.3299	up	5e-05	0.00110206
gene40172	Y39B6A.5	Uncharacterized protein	NC_003283.11:19157757-19158756	1038.58	5380.27	-2.37306	down	0.00215	0.0194369
gene1752	col-60	COLlagen	NC_003279.8:7105318-7106725	850.737	35.3274	4.58985	up	5e-05	0.00110206
gene2249	ubr-5	UBR E3 ubiquitin ligase homolog	NC_003279.8:8828417-8838593	20.8411	50.9896	-1.29077	down	0.00195	0.0181441
gene38728	F21A3.3	Uncharacterized protein	NC_003283.11:15512854-15522005	84.4428	9.95684	3.08421	up	0.00105	0.0117915
gene44730	Y71H9A.10	Uncharacterized protein	NC_003284.9:11627700-11628563	10.7926	0	-	up	0.00025	0.00406508
gene1566	T10E9.1	Uncharacterized protein	NC_003279.8:6545109-6546495	43.4719	122.048	-1.48929	down	0.0037	0.027342
gene4290	cpn-2	Transgelin	NC_003280.10:337800-339143	107.625	20.6097	2.38461	up	0.0029	0.0232014
gene12367	cor-1	Coronin-like protein cor-1	NC_003281.10:10249136-10254574	39.5231	9.02412	2.13084	up	0.0023	0.0202726
gene36533	cat-4	GTP cyclohydrolase 1	NC_003283.11:10564913-10566257	204.805	38.4912	2.41165	up	0.0002	0.00345935
gene4558	T23F4.5	-	NC_003280.10:1174004-1175657	1.14867	0	-	up	0.00015	0.0027619
gene42061	F14H12.2	Uncharacterized protein	NC_003284.9:4350497-4352744	0.859974	0	-	up	0.00025	0.00406508
gene12472	orc-1	ORC (Origin Recognition Complex) subunit	NC_003281.10:10643133-10645959	34.1829	86.3911	-1.33761	down	0.0029	0.0232014
gene6198	rab-3	Ras-related protein Rab-3	NC_003280.10:5722322-5727651	39.2066	7.43232	2.39921	up	0.00615	0.0382854
gene35755	F41E6.11	Uncharacterized protein	NC_003283.11:8620023-8621296	74.7011	4.70715	3.9882	up	0.00045	0.00637744
gene42283	ZC449.2	Uncharacterized protein	NC_003284.9:5021290-5024187	9.26802	1.64431	2.49478	up	0.00695	0.0411163
gene148	T06A4.3	Uncharacterized protein	NC_003279.8:763674-770625	54.2672	3.11592	4.12235	up	0.0003	0.00471148
gene34311	adss-1	Adenylosuccinate synthetase	NC_003283.11:4819152-4823240	187.191	405.741	-1.11605	down	0.00485	0.032635
gene41272	dpy-3	DumPY: shorter than wild-type	NC_003284.9:2144654-2145645	72.3895	13.2049	2.4547	up	0.00025	0.00406508
gene4123	aex-5	Uncharacterized protein	NC_003279.8:14850139-14855731	31.1602	9.44447	1.72216	up	0.00675	0.0406502
gene38116	D1086.6	Uncharacterized protein	NC_003283.11:14079850-14081590	61.6606	155.936	-1.33853	down	0.0056	0.0359988
gene3624	car-1	Cytokinesis, Apoptosis, RNA-associated	NC_003279.8:12904475-12905647	480.56	1196.19	-1.31566	down	0.00835	0.0463662
gene3101	M04D5.1	Uncharacterized protein	NC_003279.8:11334616-11337431	0	1.18891	-	down	5e-05	0.00110206
gene608	C45E1.5	Uncharacterized protein	NC_003279.8:3109647-3110672	0	11.4002	-	down	0.003	0.0237149
gene6995	nhx-2	Na(+)/H(+) exchanger protein 2	NC_003280.10:7690819-7693947	91.3246	23.0028	1.98919	up	0.00025	0.00406508
gene1548	acdh-1	Acyl CoA DeHydrogenase	NC_003279.8:6497452-6499464	3741.87	120.084	4.96165	up	5e-05	0.00110206
gene34230	Y47D7A.15	Uncharacterized protein	NC_003283.11:4431820-4433178	1212.04	34.7028	5.12625	up	5e-05	0.00110206
gene35994	C24B5.4	Uncharacterized protein	NC_003283.11:9195950-9197224	42.4343	5.79851	2.87148	up	0.0013	0.0137063
gene11090	nas-4	Zinc metalloproteinase nas-4	NC_003281.10:6411815-6414953	27.3858	2.66826	3.35946	up	0.0023	0.0202726
gene10725	ZC155.4	Uncharacterized protein	NC_003281.10:5212184-5215004	61.6514	174.782	-1.50335	down	0.0024	0.0206697
gene1450	T05E7.1	Uncharacterized protein	NC_003279.8:6203896-6206884	51.7327	0.746311	6.11516	up	0.00915	0.0487323
gene1832	F52A8.3	Uncharacterized protein	NC_003279.8:7322329-7323590	16.3275	0	-	up	5e-05	0.00110206
gene4185	sqt-2	SQuaT	NC_003280.10:23346-24347	508.137	9.67678	5.71455	up	5e-05	0.00110206
gene43771	K09E2.3	Uncharacterized protein	NC_003284.9:8673129-8681588	235.279	70.4225	1.74027	up	0.0012	0.0129489
gene45868	F31F6.1	Uncharacterized protein	NC_003284.9:14867100-14868300	1.27047	17.5148	-3.78515	down	0.0038	0.0277956
gene18818	col-120	COLlagen	NC_003282.8:9260668-9261753	902.469	21.1333	5.41629	up	5e-05	0.00110206
gene20410	W02A2.9	Uncharacterized protein	NC_003282.8:13347686-13348575	0	5659.25	-	down	5e-05	0.00110206
gene17307	bli-6	BLIstered cuticle	NC_003282.8:6377106-6378108	1567.66	41.4473	5.24119	up	5e-05	0.00110206
gene19425	T25B9.1	Uncharacterized protein	NC_003282.8:10748411-10750153	47.9542	14.3538	1.74023	up	0.00405	0.0290718
gene36358	ZK856.5	Uncharacterized protein	NC_003283.11:10186143-10190118	21.3006	2.54931	3.06271	up	0.0014	0.0144568
gene42427	C25F6.6	Uncharacterized protein	NC_003284.9:5450261-5450823	11.3336	0	-	up	5e-05	0.00110206
gene8621	Y57A10C.11	Uncharacterized protein	NC_003280.10:12414066-12414905	0	3.74567	-	down	5e-05	0.00110206
gene39870	R10E8.6	Uncharacterized protein	NC_003283.11:18259300-18266364	5.73939	0.873154	2.71659	up	0.0019	0.0177989
gene13784	Y94H6A.10	Uncharacterized protein	NC_003282.8:2710120-2710666	372.611	2275.27	-2.6103	down	5e-05	0.00110206
gene46329	mua-6	Intermediate filament protein ifa-2	NC_003284.9:16262480-16265681	75.5334	9.65731	2.96742	up	5e-05	0.00110206
gene1117	hcp-6	HoloCentric chromosome binding Protein	NC_003279.8:5165156-5171301	14.7584	40.381	-1.45214	down	0.0003	0.00471148
gene44966	E01G6.3	Carboxylic ester hydrolase	NC_003284.9:12241732-12244475	9.57481	1.1118	3.10635	up	0.0042	0.0297487
gene36894	clec-223	C-type LECtin	NC_003283.11:11273147-11278068	1.4459	6.95343	-2.26575	down	0.00175	0.0168417
gene7804	pho-11	Putative acid phosphatase 11	NC_003280.10:9931862-9934364	380.665	37.6209	3.33892	up	5e-05	0.00110206
gene33813	K08D9.6	Uncharacterized protein	NC_003283.11:3231397-3234887	0.988877	0	-	up	5e-05	0.00110206
gene34284	F39G3.3	Uncharacterized protein	NC_003283.11:4731910-4734430	11.3899	34.4743	-1.59776	down	0.0026	0.0216488
gene34991	K11G9.2	Carboxylic ester hydrolase	NC_003283.11:6674267-6676326	18.3902	1.32812	3.79147	up	0.00205	0.018779
gene7429	lat-1	Latrophilin-like protein 1	NC_003280.10:8896878-8908098	46.8014	109.901	-1.23159	down	0.00195	0.0181441
gene19774	lys-6	LYSozyme	NC_003282.8:11626961-11627935	189.682	3.87392	5.61365	up	0.00085	0.0100071
gene42109	asb-2	ATP Synthase B homolog	NC_003284.9:4469774-4471222	752.598	274.287	1.4562	up	0.0006	0.00788238
gene18373	col-115	COLlagen	NC_003282.8:7988687-7991313	56.3012	3.37827	4.05881	up	0.0005	0.00687417
gene20310	F49E11.2	Uncharacterized protein	NC_003282.8:13036076-13038926	17.8477	2.4259	2.87914	up	0.0073	0.0423989
gene8764	Y46G5A.29	Uncharacterized protein	NC_003280.10:12856219-12861846	23.0636	0.719215	5.00305	up	0.00475	0.0321057
gene111	grl-16	GRound-Like (grd related)	NC_003279.8:572436-575066	501.868	21.3179	4.55717	up	5e-05	0.00110206
gene37876	mes-4	Histone-lysine N-methyltransferase mes-4	NC_003283.11:13433441-13437513	17.1213	44.699	-1.38445	down	0.00435	0.0304721
gene34261	F41F3.8	Uncharacterized protein	NC_003283.11:4648831-4650399	399.68	13.946	4.84092	up	0.00415	0.0294575
gene4777	F36H5.8	Uncharacterized protein	NC_003280.10:1750140-1750659	0	3.37327	-	down	0.0002	0.00345935
gene26507	tbx-40	Putative T-box protein 40	NC_003282.8:15326938-15328186	0	1.04149	-	down	5e-05	0.00110206
gene13030	npp-18	Nucleoporin SEH1	NC_003281.10:13296856-13298786	78.8412	251.014	-1.67075	down	0.0005	0.00687417
gene13225	grl-19	GRound-Like (grd related)	NC_003282.8:251969-252534	7.08748	0	-	up	5e-05	0.00110206
gene7713	ZK1320.2	Uncharacterized protein	NC_003280.10:9657948-9658998	984.502	271.272	1.85965	up	5e-05	0.00110206
gene43695	H03E18.1	Uncharacterized protein	NC_003284.9:8507912-8513899	29.5034	1.22171	4.59391	up	5e-05	0.00110206
gene1157	F48C1.9	Uncharacterized protein	NC_003279.8:5332339-5332760	0	783.653	-	down	5e-05	0.00110206
gene34202	F32D1.7	Uncharacterized protein	NC_003283.11:4375137-4376167	35.8921	252.02	-2.8118	down	5e-05	0.00110206
gene1644	unc-87	Protein unc-87	NC_003279.8:6761766-6767790	984.882	278.517	1.82218	up	0.0002	0.00345935
gene39556	F47H4.2	Uncharacterized protein	NC_003283.11:17353372-17360120	7.84169	1.51524	2.37162	up	0.00695	0.0411163
gene35548	sth-1	SpermaTHecal expression	NC_003283.11:8052159-8053711	297.798	41.1236	2.8563	up	0.0035	0.0265151
gene6809	C27H5.2	Uncharacterized protein	NC_003280.10:7155682-7160847	38.2199	10.1664	1.91052	up	0.00275	0.0224019
gene36140	T06E4.14	Uncharacterized protein	NC_003283.11:9625460-9626196	173.057	10.2063	4.08371	up	0.00025	0.00406508
gene38266	egl-1	Programmed cell death activator egl-1	NC_003283.11:14431481-14432295	0	7.95789	-	down	0.00535	0.0349206
gene46209	Y7A5A.1	Uncharacterized protein	NC_003284.9:15767520-15771491	127.619	17.9223	2.83202	up	5e-05	0.00110206
gene34577	M03E7.4	Uncharacterized protein	NC_003283.11:5609413-5613151	7.60697	0.474518	4.00279	up	0.00555	0.0357885
gene9767	Y22D7AL.11	Uncharacterized protein	NC_003281.10:1626638-1637561	11.4686	1.12032	3.35571	up	0.0089	0.0477387
gene23537	Y57G11A.2	Uncharacterized protein	NC_003282.8:14517090-14519458	73.1131	29.936	1.28825	up	0.00475	0.0321057
gene7279	lact-4	beta-LACTamase domain containing	NC_003280.10:8478027-8480473	17.0735	51.9958	-1.60663	down	0.0051	0.0339174
gene11997	ZC84.6	Uncharacterized protein	NC_003281.10:9193218-9199507	2.42315	0.470894	2.36341	up	0.00705	0.0414707
gene12707	tbx-33	Putative T-box protein 33	NC_003281.10:11633405-11636825	1.6271	11.8882	-2.86916	down	0.00615	0.0382854
gene38941	clec-232	C-type LECtin	NC_003283.11:15976151-15977569	0	3.63248	-	down	5e-05	0.00110206
gene4379	T04B8.2	-	NC_003280.10:630074-631980	0	3.73969	-	down	5e-05	0.00110206
gene19151	gipc-2	GIPC (RGS-GAIP Interacting Protein C) homolog	NC_003282.8:10026442-10027614	284.571	93.4262	1.60689	up	0.00075	0.00925093
gene663	W05F2.3	Uncharacterized protein	NC_003279.8:3367767-3368550	172.831	823.741	-2.25283	down	5e-05	0.00110206
gene13686	vha-11	V-type proton ATPase subunit C	NC_003282.8:2308245-2314534	225.684	95.9861	1.23341	up	0.004	0.028838
gene39076	F21H7.5	Major sperm protein	NC_003283.11:16237614-16238712	145.209	45.4078	1.67712	up	0.0015	0.0151584
gene35688	mrps-2	Mitochondrial Ribosomal Protein, Small	NC_003283.11:8465685-8467026	101.166	233.896	-1.20914	down	0.008	0.0451343
gene20664	fbxa-215	F-box A protein	NC_003282.8:13665489-13666869	62.7693	264.42	-2.0747	down	5e-05	0.00110206
gene9358	col-88	COLlagen	NC_003281.10:41062-41971	969.422	30.392	4.99536	up	5e-05	0.00110206
gene20104	acs-20	fatty Acid CoA Synthetase family	NC_003282.8:12392480-12398642	48.9224	6.77811	2.85154	up	0.0001	0.00197766
gene10858	B0336.13	Transcription initiation factor IIA small chain homolog	NC_003281.10:5694047-5694581	134.142	441.177	-1.7176	down	0.0061	0.03806
gene18844	F49C12.15	Uncharacterized protein	NC_003282.8:9324470-9327450	72.4487	29.2123	1.31038	up	0.0063	0.0389701
gene13917	T26C12.3	Uncharacterized protein	NC_003282.8:3269526-3273394	1.2565	11.1632	-3.15127	down	0.00725	0.0421973
gene7351	C34C6.3	Uncharacterized protein	NC_003280.10:8691921-8694031	19.0154	1.51415	3.65059	up	0.00135	0.0140456
gene11276	egg-2	EGG sterile (unfertilizable)	NC_003281.10:7058641-7060580	44.2403	199.987	-2.17647	down	5e-05	0.00110206
gene14222	dpy-13	Cuticle collagen dpy-13	NC_003282.8:4235630-4236647	1340.72	39.9445	5.06887	up	5e-05	0.00110206
gene36643	ule-3	Uterine Lumin Expressed/locailized	NC_003283.11:10793807-10794861	226.584	1136.22	-2.32613	down	5e-05	0.00110206
gene40363	W04E12.7	Uncharacterized protein	NC_003283.11:19735163-19737522	44.4845	8.27173	2.42704	up	0.00475	0.0321057
gene7994	F59B10.5	Uncharacterized protein	NC_003280.10:10521951-10523137	445.792	32.5276	3.77663	up	0.0095	0.0499059
gene20175	ham-1	Uncharacterized protein	NC_003282.8:12542215-12545330	2.60687	21.2468	-3.02686	down	0.0009	0.010484
gene5869	msp-152	Major sperm protein 152	NC_003280.10:4933026-4933410	742.821	247.065	1.58812	up	0.00375	0.0274906
gene35526	Y97E10AR.3	Uncharacterized protein	NC_003283.11:8006255-8007484	34.9213	88.5274	-1.34202	down	0.00845	0.0466398
gene6206	hlh-14	Helix Loop Helix	NC_003280.10:5737935-5738801	0	17.2573	-	down	5e-05	0.00110206
gene9164	K10H10.4	Uncharacterized protein	NC_003280.10:14500491-14501541	106.641	10.8933	3.29125	up	0.00125	0.0133406
gene40650	F53F8.3	Uncharacterized protein	NC_003283.11:20688835-20689518	19.9754	133.463	-2.74014	down	0.0008	0.00954063
gene34584	memb-2	Golgi SNAP receptor complex member 2	NC_003283.11:5618348-5619196	68.668	205.981	-1.5848	down	0.0028	0.0226976
gene5130	fbxb-108	F-box B protein	NC_003280.10:2764968-2767230	0	3.01412	-	down	5e-05	0.00110206
gene5648	F56D3.1	Uncharacterized protein	NC_003280.10:4146343-4149395	104.107	2.65245	5.29459	up	5e-05	0.00110206
gene13235	sma-10	Leucine-rich repeats and immunoglobulin-like domains protein sma-10	NC_003282.8:274625-279815	31.5085	9.34029	1.7542	up	0.00245	0.0209694
gene6347	R12C12.1	Uncharacterized protein	NC_003280.10:6050439-6054227	95.8074	24.9621	1.9404	up	5e-05	0.00110206
gene8293	C05D12.3	Uncharacterized protein	NC_003280.10:11425280-11430553	46.9403	8.2966	2.50023	up	5e-05	0.00110206
gene6568	F18C5.9	Uncharacterized protein	NC_003280.10:6567133-6567870	0	2.43074	-	down	0.00415	0.0294575
gene34386	K11D12.13	Uncharacterized protein	NC_003283.11:5033408-5034117	62.6227	306.27	-2.29005	down	0.0002	0.00345935
gene32413	Y116A8C.43	Uncharacterized protein	NC_003282.8:17088850-17090646	0.95295	0	-	up	0.0086	0.0469976
gene34839	T28C12.6	Uncharacterized protein	NC_003283.11:6334247-6336114	28.0634	1.79627	3.96561	up	0.00685	0.0408311
gene12482	fmo-3	Dimethylaniline monooxygenase [N-oxide-forming	NC_003281.10:10694693-10698791	41.9815	4.1116	3.35198	up	0.00045	0.00637744
gene3517	W02D9.7	Uncharacterized protein	NC_003279.8:12559364-12559658	393.696	1876.02	-2.25253	down	0.00225	0.0200561
gene10967	ZK328.4	Uncharacterized protein	NC_003281.10:6006553-6008983	25.6632	67.7907	-1.40139	down	0.00465	0.0317539
gene18846	T20D3.2	Uncharacterized protein	NC_003282.8:9329112-9330852	1279.68	309.808	2.04633	up	0.0001	0.00197766
gene6329	ZK84.2	Uncharacterized protein	NC_003280.10:6014506-6015817	77.5173	21.2008	1.8704	up	0.0078	0.044308
gene7953	E04D5.5	Uncharacterized protein	NC_003280.10:10411594-10412318	254.944	0	-	up	0.00025	0.00406508
gene46578	C08A9.9	Uncharacterized protein	NC_003284.9:17106789-17107741	0	2.66493	-	down	5e-05	0.00110206
gene6406	szy-4	Sdownpressor of ZYg-1	NC_003280.10:6198789-6201407	32.5564	79.0367	-1.27958	down	0.0038	0.0277956
gene6663	ssdown-72	SSU (yeast Sdownpressor of SUa7) Protein homolog	NC_003280.10:6777076-6777833	40.4274	166.597	-2.04296	down	0.0014	0.0144568
gene2160	rskn-1	Ribosomal protein S6 kinase	NC_003279.8:8574272-8580119	37.648	112.148	-1.57475	down	0.0004	0.00586466
gene9175	pot-2	Protection Of Telomeres 1 (Pot1) homolog	NC_003280.10:14524194-14525046	34.7861	106.367	-1.61246	down	0.00495	0.0331462
gene1731	plin-1	PeriLIpiN homolog	NC_003279.8:7057207-7059295	161.047	404.753	-1.32956	down	0.0011	0.012147
gene5971	C27D6.3	Uncharacterized protein	NC_003280.10:5171909-5177281	408.066	88.6689	2.2023	up	0.0027	0.0221472
gene45881	daf-6	Uncharacterized protein	NC_003284.9:14888494-14894141	10.3878	0.596235	4.12286	up	0.00155	0.0155028
gene18430	faah-2	Fatty Acid Amide Hydrolase homolog	NC_003282.8:8152450-8154657	43.9703	173.87	-1.98341	down	5e-05	0.00110206
gene9351	fbxa-6	F-box A protein	NC_003281.10:1270-2917	17.2793	2.18996	2.98007	up	0.00645	0.0395579
gene9742	Y67D2.7	Uncharacterized protein	NC_003281.10:1555828-1558522	48.9473	119.175	-1.28377	down	0.0081	0.0455278
gene1637	unc-37	Transcription factor unc-37	NC_003279.8:6742523-6745324	35.0542	95.9546	-1.45277	down	0.00145	0.014816
gene5215	C41H7.3	Uncharacterized protein	NC_003280.10:3005850-3007392	7.30552	61.4754	-3.07295	down	0.0001	0.00197766
gene38916	pzf-1	Paired Zinc Finger protein	NC_003283.11:15926671-15928371	3.10895	16.7445	-2.42919	down	0.0041	0.0293037
gene19830	gem-4	Gon-2 Extragenic Modifier	NC_003282.8:11745675-11748588	8.19207	52.2888	-2.6742	down	5e-05	0.00110206
gene1288	lron-8	eLRR (extracellular Leucine-Rich Repeat) ONly	NC_003279.8:5769019-5773454	45.6058	10.376	2.13596	up	0.003	0.0237149
gene19033	T13F2.4	Uncharacterized protein	NC_003282.8:9789807-9791917	6.67431	0	-	up	5e-05	0.00110206
gene45869	F31F6.2	Uncharacterized protein	NC_003284.9:14869605-14870675	2.22507	21.5108	-3.27314	down	0.0059	0.0372758
gene10808	D1044.6	Uncharacterized protein	NC_003281.10:5536202-5543135	16.4738	43.844	-1.41221	down	0.0019	0.0177989
gene4579	Y57G7A.2	Uncharacterized protein	NC_003280.10:1296084-1296746	0	17.9623	-	down	5e-05	0.00110206
gene14413	memi-1	MEiosis-to-MItosis transition associated	NC_003282.8:4759239-4760427	27.7972	85.4881	-1.62078	down	0.0033	0.0253951
gene19104	gon-1	Uncharacterized protein	NC_003282.8:9935066-9953429	10.9203	3.32595	1.71517	up	0.0045	0.0311798
gene856	suco-1	SUn (SUN) domain Containing Ossification factor homolog	NC_003279.8:4178860-4181738	60.6821	146.782	-1.27433	down	0.0041	0.0293037
gene46412	T25D1.3	Uncharacterized protein	NC_003284.9:16505247-16507411	0	1.15325	-	down	0.0007	0.00881148
gene20364	F58D2.3	Uncharacterized protein	NC_003282.8:13180178-13180735	0	1.45478	-	down	0.00745	0.0430887
gene10039	T20B6.3	Uncharacterized protein	NC_003281.10:2899440-2900402	49.8545	4.04582	3.62322	up	0.0003	0.00471148
gene3984	eya-1	Eyes absent homolog	NC_003279.8:14220872-14231242	1.11305	11.7329	-3.39797	down	0.00445	0.030911
gene2348	clec-91	C-type lectin domain-containing protein 91	NC_003279.8:9126242-9127030	106.577	550.334	-2.36841	down	5e-05	0.00110206
gene19605	sdz-27	SKN-1 Dependent Zygotic transcript	NC_003282.8:11187056-11188209	139.561	346.239	-1.31087	down	0.0071	0.041617
gene19955	sqst-1	SeQueSTosome related	NC_003282.8:12034281-12036720	95.3273	248.833	-1.38421	down	0.00075	0.00925093
gene39750	tcc-1	Transmembrane and Coiled-Coil protein	NC_003283.11:17846186-17855986	92.7163	247.959	-1.41921	down	0.00105	0.0117915
gene9875	cpt-3	Carnitine Palmitoyl Transferase	NC_003281.10:2082824-2088237	2.44641	12.4565	-2.34815	down	0.0058	0.0368834
gene32871	B0348.1	Uncharacterized protein	NC_003283.11:48921-49619	0	75.1712	-	down	0.00065	0.0083666
gene10872	egg-1	EGG sterile (unfertilizable)	NC_003281.10:5728182-5730023	106.206	477.891	-2.16982	down	5e-05	0.00110206
gene14136	clec-77	-	NC_003282.8:3969930-3972616	0	2.02513	-	down	5e-05	0.00110206
gene14077	bris-1	BRag/Iqsec/Schizo related Arf GEF family member	NC_003282.8:3808079-3819323	22.9623	63.2864	-1.46263	down	0.003	0.0237149
gene41664	K09C4.5	Uncharacterized protein	NC_003284.9:3282673-3285641	29.6851	0.885558	5.06701	up	0.00515	0.0340992
gene45349	C29F7.11	Unclassified non-coding RNA C29F7.11	NC_003284.9:13411583-13412122	5.38278	0	-	up	5e-05	0.00110206
gene45279	K08H2.2	Uncharacterized protein	NC_003284.9:13234277-13234957	0	10.6473	-	down	5e-05	0.00110206
gene45078	T24D5.6	Uncharacterized protein	NC_003284.9:12603621-12604060	0	4.7582	-	down	0.00415	0.0294575
gene2679	hpo-24	Protein argonaute	NC_003279.8:9989803-9993657	28.1284	72.5213	-1.36638	down	0.0014	0.0144568
gene10826	ced-6	Cell death protein 6	NC_003281.10:5595770-5597851	26.3061	84.3959	-1.68178	down	0.00145	0.014816
gene12329	ZK1128.4	Uncharacterized protein	NC_003281.10:10119041-10120148	46.4513	117.427	-1.33798	down	0.00735	0.0426146
gene7459	C18E9.7	Uncharacterized protein	NC_003280.10:8978916-8982678	17.1577	3.72308	2.20429	up	0.0067	0.0406097
gene30281	K03D3.2	Uncharacterized protein	NC_003282.8:16328134-16328614	88.1162	8.9902	3.29298	up	0.0037	0.027342
gene36339	wdr-20	WD repeat-containing protein 20 homolog	NC_003283.11:10130767-10133946	41.1501	86.5343	-1.07238	down	0.0091	0.0485597
gene2551	T05F1.11	Uncharacterized protein	NC_003279.8:9653138-9656034	25.598	0.951006	4.75043	up	0.00055	0.00740175
gene7881	gpd-4	Glyceraldehyde-3-phosphate dehydrogenase 4	NC_003280.10:10171279-10172405	76.1686	213.935	-1.48991	down	0.0013	0.0137063
gene2432	marc-3	MARCH (Membrane-Associated Ring finger (C3HC4)) homolog	NC_003279.8:9416899-9418873	45.9718	176.252	-1.93882	down	0.0002	0.00345935
gene774	clec-53	C-type LECtin	NC_003279.8:3871502-3873396	20.7049	3.40444	2.60448	up	0.0068	0.0406502
gene37030	srh-1	Serpentine Receptor, class H	NC_003283.11:11485857-11487090	0.924391	0	-	up	0.00025	0.00406508
gene3752	T04D3.5	Uncharacterized protein	NC_003279.8:13325361-13333336	16.1439	88.1817	-2.44949	down	0.00215	0.0194369
gene19513	Y69E1A.8	Uncharacterized protein	NC_003282.8:10966669-10968111	22.722	5.44014	2.06237	up	0.00855	0.0468481
gene11486	ZK112.5	Uncharacterized protein	NC_003281.10:7738097-7739656	1.58694	0	-	up	0.00235	0.0203769
gene5702	pacs-1	Phosphoribosylaminoimidazole-succinocarboxamide synthase	NC_003280.10:4369746-4372515	95.8617	10.0207	3.25798	up	5e-05	0.00110206
gene2405	lin-41	Protein lin-41	NC_003279.8:9335964-9341897	26.5793	118.575	-2.15743	down	0.0001	0.00197766
gene43338	F26A10.1	Uncharacterized protein	NC_003284.9:7627680-7627848	1241.35	0	-	up	0.0068	0.0406502
gene25406	Y41E3.11	Uncharacterized protein	NC_003282.8:15039618-15048936	24.3226	86.4724	-1.82994	down	0.00175	0.0168417
gene37988	F20G2.2	Uncharacterized protein	NC_003283.11:13755047-13756393	143.949	47.9997	1.58446	up	0.00475	0.0321057
gene3973	ZK849.1	Uncharacterized protein	NC_003279.8:14182786-14185595	19.0498	3.22682	2.5616	up	0.0062	0.0384809
gene1511	gld-2	Uncharacterized protein	NC_003279.8:6370028-6385084	39.3443	87.1314	-1.14704	down	0.00685	0.0408311
gene10407	ckb-2	Choline kinase B2	NC_003281.10:4367975-4370099	11.771	39.8475	-1.75925	down	0.00725	0.0421973
gene33220	rga-4	Rho GTPase Activating protein	NC_003283.11:1373588-1383239	24.9166	65.8912	-1.40298	down	0.00095	0.0109508
gene44270	C14H10.3	Uncharacterized protein	NC_003284.9:10221181-10228136	49.749	13.6091	1.8701	up	0.0007	0.00881148
gene12921	ssl-1	Helicase ssl-1	NC_003281.10:12714587-12743929	18.2765	47.7639	-1.38593	down	0.00175	0.0168417
gene12633	T28D6.4	Uncharacterized protein	NC_003281.10:11360487-11366034	9.5822	2.14382	2.16017	up	0.00335	0.025732
gene6496	btb-2	BTB (Broad/complex/Tramtrack/Bric a brac) domain protein	NC_003280.10:6402004-6403008	37.3313	8.05658	2.21214	up	0.00485	0.032635
gene7833	F52H3.6	Serine/threonine-protein phosphatase	NC_003280.10:10026649-10027863	67.8692	17.2431	1.97674	up	0.0023	0.0202726
gene19189	msp-36	Major sperm protein 10/36/56/76	NC_003282.8:10095432-10095816	1585.7	495.135	1.67923	up	0.0005	0.00687417
gene12742	tbx-38	Putative T-box protein 38	NC_003281.10:11784213-11786052	0	2.96265	-	down	5e-05	0.00110206
gene33221	Y75B7AR.1	Uncharacterized protein	NC_003283.11:1391256-1392041	788.509	29.3143	4.74945	up	0.00105	0.0117915
gene19052	msp-56	Major sperm protein 10/36/56/76	NC_003282.8:9841539-9841923	736.628	219.446	1.74707	up	0.00295	0.0234992
gene707	mis-12	human/fission yeast MIS (MInichromosome Stability) homolog	NC_003279.8:3604678-3605694	57.0187	173.727	-1.60731	down	0.0071	0.041617
gene4523	fbxb-40	F-box B protein	NC_003280.10:1048912-1049821	0	8.19195	-	down	5e-05	0.00110206
gene10844	sdz-21	SKN-1 Dependent Zygotic transcript	NC_003281.10:5655221-5656994	0	9.33367	-	down	5e-05	0.00110206
gene14137	clec-79	C-type LECtin	NC_003282.8:3973367-3975663	35.9335	10.3662	1.79344	up	0.0033	0.0253951
gene8476	top-2	Probable DNA topoisomerase 2	NC_003280.10:11875156-11880303	47.979	112.043	-1.22358	down	0.00385	0.0280498
gene10992	kin-18	Serine/threonine-protein kinase SULU	NC_003281.10:6118894-6123790	40.1689	102.769	-1.35525	down	0.00065	0.0083666
gene35150	mdt-6	Mediator of RNA polymerase II transcription subunit 6	NC_003283.11:7058626-7059619	85.1158	206.576	-1.27917	down	0.00885	0.0475476
gene5805	F26G1.5	Uncharacterized protein	NC_003280.10:4770677-4771381	217.145	17.68	3.61847	up	0.0002	0.00345935
gene41389	R04B3.3	Uncharacterized protein	NC_003284.9:2473885-2475929	11.3958	0.884361	3.68773	up	0.00345	0.0262806
gene2119	F10D11.6	Uncharacterized protein	NC_003279.8:8445752-8450994	177.182	7.0853	4.64426	up	5e-05	0.00110206
gene33684	pals-32	Protein containing ALS2cr12 (ALS2CR12) domain	NC_003283.11:2896636-2898417	3.86719	24.6653	-2.67313	down	0.00235	0.0203769
gene37867	cut-2	Cuticlin-2	NC_003283.11:13415099-13415936	441.714	31.8471	3.79388	up	5e-05	0.00110206
gene40460	ncx-1	Na/Ca eXchangers	NC_003283.11:20105793-20120656	58.609	27.1451	1.11043	up	0.0091	0.0485597
gene45686	Y60A9.3	Uncharacterized protein	NC_003284.9:14383250-14383862	0	4.84672	-	down	5e-05	0.00110206
gene18234	nep-16	NEPrilysin metallopeptidase family	NC_003282.8:7635792-7641821	5.78402	0.349158	4.05012	up	0.0055	0.0356048
gene34733	anr-32	antisense RNA anr-32	NC_003283.11:6003574-6006746	0	2.68367	-	down	5e-05	0.00110206
gene2951	C35E7.7	Uncharacterized protein	NC_003279.8:10813814-10814887	2.29049	0	-	up	0.0068	0.0406502
gene19131	mam-2	MAM (Meprin, A5-protein, PTPmu) domain protein	NC_003282.8:9983289-9989450	36.1608	0.738426	5.61383	up	0.0006	0.00788238
gene12967	ttm-1	Toxin-regulated Targets of MAPK	NC_003281.10:12953204-12966992	27.3709	120.105	-2.13358	down	5e-05	0.00110206
gene40808	ZK1193.2	Uncharacterized protein	NC_003284.9:406489-416535	22.6937	5.39446	2.07274	up	0.00045	0.00637744
gene7465	ooc-5	Torsin-like protein	NC_003280.10:8993172-8994385	71.349	161.103	-1.17502	down	0.0091	0.0485597
gene42286	ZC449.1	Uncharacterized protein	NC_003284.9:5024627-5028081	10.7329	0.551771	4.28182	up	0.00655	0.0399345
gene8017	C06A1.4	-	NC_003280.10:10574841-10578193	11.8788	36.3824	-1.61485	down	0.00155	0.0155028
gene36450	pqn-2	Prion-like-(Q/N-rich)-domain-bearing protein	NC_003283.11:10382477-10383976	30.9291	1.66926	4.21168	up	0.0007	0.00881148
gene13018	Y43F4A.4	Uncharacterized protein	NC_003281.10:13245582-13245958	15.5018	0	-	up	0.0008	0.00954063
gene5763	che-10	Uncharacterized protein	NC_003280.10:4627993-4638341	7.95888	2.74119	1.53776	up	0.00895	0.0479293
gene20339	C39E9.12	Uncharacterized protein	NC_003282.8:13094010-13095379	42.4689	111.719	-1.39539	down	0.0041	0.0293037
gene13466	dsl-2	Delta-like protein	NC_003282.8:1202696-1204961	0.942528	38.3752	-5.3475	down	0.00585	0.037059
gene1667	dpy-14	DumPY: shorter than wild-type	NC_003279.8:6843622-6845092	0.922536	126.035	-7.09401	down	0.00295	0.0234992
gene6851	C30G12.2	Uncharacterized protein	NC_003280.10:7290458-7291719	99.8947	15.2311	2.71339	up	0.0007	0.00881148
gene36938	grl-7	GRound-Like (grd related)	NC_003283.11:11344955-11347011	232.885	4.18955	5.79668	up	5e-05	0.00110206
gene6116	C17C3.11	Uncharacterized protein	NC_003280.10:5537834-5538410	7.57306	0	-	up	5e-05	0.00110206
gene7621	M176.4	Uncharacterized protein	NC_003280.10:9420479-9421862	214.854	39.8752	2.4298	up	0.0002	0.00345935
gene5264	Y25C1A.2	Uncharacterized protein	NC_003280.10:3112619-3113256	0	3.17885	-	down	5e-05	0.00110206
gene35469	C37C3.9	Uncharacterized protein	NC_003283.11:7852564-7853796	86.8258	311.49	-1.84299	down	0.0001	0.00197766
gene11985	ZK512.8	Uncharacterized protein	NC_003281.10:9146082-9147345	117.911	29.7694	1.9858	up	0.00435	0.0304721
gene18370	mec-17	Uncharacterized protein	NC_003282.8:7984013-7987152	91.7828	25.7511	1.83359	up	0.0053	0.0348
gene10104	R148.7	Uncharacterized protein	NC_003281.10:3195587-3198306	52.8482	15.0692	1.81025	up	0.0092	0.0488728
gene37029	col-157	COLlagen	NC_003283.11:11484053-11484998	413.734	5.47367	6.24005	up	5e-05	0.00110206
gene36038	tag-153	Uncharacterized protein	NC_003283.11:9323383-9326724	52.7707	114.021	-1.1115	down	0.00725	0.0421973
gene43792	asns-2	ASparagiNe Synthetase	NC_003284.9:8748609-8750862	87.9628	36.1964	1.28105	up	0.0072	0.0420097
gene1852	col-7	Cuticle collagen 7	NC_003279.8:7401696-7402708	176.042	14.1873	3.63325	up	5e-05	0.00110206
gene880	Y47D9A.4	Uncharacterized protein	NC_003279.8:4273913-4274742	81.4963	0	-	up	5e-05	0.00110206
gene12193	mcm-6	DNA replication licensing factor mcm-6	NC_003281.10:9794367-9798494	54.1297	146.821	-1.43956	down	0.0005	0.00687417
gene8796	ptr-18	PaTched Related family	NC_003280.10:12965567-12977893	51.6253	2.66668	4.27496	up	5e-05	0.00110206
gene34257	pmt-2	Phosphoethanolamine MethylTransferase	NC_003283.11:4628767-4635191	426.297	180.465	1.24014	up	0.00395	0.0286021
gene4996	F43C11.1	Uncharacterized protein	NC_003280.10:2357094-2358278	0	1.20788	-	down	0.0022	0.0197487
gene1126	osr-1	Uncharacterized protein	NC_003279.8:5200351-5203406	22.3473	0.624974	5.16016	up	0.00185	0.0174989
gene11554	col-90	Putative cuticle collagen 90	NC_003281.10:7948889-7949907	280.542	4.68146	5.90512	up	5e-05	0.00110206
gene41158	ceh-21	Homeobox protein ceh-21	NC_003284.9:1850050-1852736	2.31742	17.4943	-2.91629	down	0.00155	0.0155028
gene2027	2018-04-01	APC Related	NC_003279.8:8050042-8055141	22.773	54.1404	-1.24938	down	0.002	0.0184435
gene33047	F31F4.11	Uncharacterized protein	NC_003283.11:662478-664400	1.62008	0	-	up	5e-05	0.00110206
gene8403	trr-1	Transcription-associated protein 1	NC_003280.10:11661799-11675856	8.67798	18.3182	-1.07785	down	0.008	0.0451343
gene3819	unc-59	Uncharacterized protein	NC_003279.8:13629232-13633270	58.344	136.713	-1.22849	down	0.00435	0.0304721
gene35903	F59E11.5	Uncharacterized protein	NC_003283.11:8995101-8996193	158.941	47.7617	1.73457	up	0.0025	0.0211243
gene18279	col-14	Cuticle collagen 14	NC_003282.8:7748213-7757413	1111.92	30.4625	5.18988	up	5e-05	0.00110206
gene32994	C14C6.5	Uncharacterized protein	NC_003283.11:536646-537375	710.573	98.8431	2.84577	up	5e-05	0.00110206
gene18364	F57H12.6	Uncharacterized protein	NC_003282.8:7975496-7976296	1188.28	15.923	6.22162	up	5e-05	0.00110206
gene40211	F55C9.14	Uncharacterized protein	NC_003283.11:19299588-19300461	0	2.68362	-	down	5e-05	0.00110206
gene35456	xpo-1	eXPOrtin (nuclear export receptor)	NC_003283.11:7805361-7813868	97.2304	250.006	-1.36248	down	0.00285	0.022901
gene4299	C03H5.5	Uncharacterized protein	NC_003280.10:382365-385354	20.5153	5.65229	1.85979	up	0.0086	0.0469976
gene18262	nhr-8	Nuclear hormone receptor family member nhr-8	NC_003282.8:7711148-7714169	48.7812	17.9156	1.44511	up	0.00805	0.0453237
gene13132	set-16	Histone-lysine N-methyltransferase	NC_003281.10:13643980-13656337	5.6849	13.7113	-1.27016	down	0.00695	0.0411163
gene10939	bcl-7	BCL7-like protein	NC_003281.10:5926085-5926795	112.609	389.634	-1.7908	down	0.0022	0.0197487
gene3629	pfn-1	Profilin-1	NC_003279.8:12922039-12923282	322.186	1138.31	-1.82093	down	0.0008	0.00954063
gene13513	Y77E11A.7	Uncharacterized protein	NC_003282.8:1411095-1419845	37.5814	88.3644	-1.23345	down	0.0046	0.0315165
gene33112	K09C6.9	Uncharacterized protein	NC_003283.11:853489-855064	148.516	42.4219	1.80774	up	0.00325	0.0251037
gene13823	clec-82	C-type LECtin	NC_003282.8:2835679-2838515	42.0478	0.881774	5.57548	up	0.00225	0.0200561
gene34661	ZC250.4	Uncharacterized protein	NC_003283.11:5812731-5813097	55.8085	386.523	-2.792	down	0.00875	0.0471787
gene36135	T06E4.10	Uncharacterized protein	NC_003283.11:9618316-9618986	105.643	4.32348	4.61086	up	0.00285	0.022901
gene36877	ima-1	Importin subunit alpha-1	NC_003283.11:11239705-11241469	60.9939	170.991	-1.48719	down	0.00115	0.0125072
gene10595	clec-157	C-type LECtin	NC_003281.10:4843492-4844410	0	1.26587	-	down	0.0016	0.0158972
gene3505	asah-1	Acid ceramidase	NC_003279.8:12505124-12507511	246.328	99.1689	1.31262	up	0.0023	0.0202726
gene13704	eri-5	Enhanced RNAI (RNA interference)	NC_003282.8:2390820-2396038	11.5338	45.6068	-1.98338	down	0.00725	0.0421973
gene33224	R12A1.3	Uncharacterized protein	NC_003283.11:1423111-1425665	59.7718	2.00509	4.89773	up	0.0025	0.0211243
gene1046	icmt-1	Protein-S-isoprenylcysteine O-methyltransferase	NC_003279.8:4901997-4903100	142.265	14.7382	3.27094	up	0.00015	0.0027619
gene4885	F59H6.14	Uncharacterized protein	NC_003280.10:2033636-2034522	0	34.5454	-	down	0.0011	0.012147
gene11329	F37C12.1	Uncharacterized protein	NC_003281.10:7184347-7187795	60.4432	138.618	-1.19747	down	0.0075	0.043272
gene37465	K01D12.5	Uncharacterized protein	NC_003283.11:12397849-12398707	41.3325	1.60002	4.69111	up	0.00305	0.0239614
gene9454	F10C5.2	Uncharacterized protein	NC_003281.10:472332-475082	89.0691	222.037	-1.3178	down	0.00135	0.0140456
gene13479	clec-166	C-type LECtin	NC_003282.8:1249244-1251340	46.1124	2.45621	4.23065	up	0.0019	0.0177989
gene5847	col-17	COLlagen	NC_003280.10:4866542-4867423	360.182	4.76196	6.24103	up	5e-05	0.00110206
gene44772	gst-42	Probable maleylacetoacetate isomerase	NC_003284.9:11726493-11727796	99.0489	21.0509	2.23426	up	0.005	0.0333999
gene37700	T16G1.6	Uncharacterized protein	NC_003283.11:12935581-12937159	19.871	0.508834	5.28732	up	0.00875	0.0471787
gene41722	cht-1	Probable endochitinase	NC_003284.9:3397798-3400016	5.32581	108.769	-4.35212	down	5e-05	0.00110206
gene33782	F02C9.1	Uncharacterized protein	NC_003283.11:3138747-3139090	12.045	0	-	up	0.0068	0.0406502
gene34256	sumv-2	Protein sumv-2	NC_003283.11:4617946-4627580	17.015	40.0157	-1.23376	down	0.0073	0.0423989
gene10461	cpg-1	Chondroitin proteoglycan 1	NC_003281.10:4489362-4491262	181.873	1178.26	-2.69565	down	5e-05	0.00110206
gene1054	dip-2	Disco-Interacting Protein 2 homolog	NC_003279.8:4934117-4948941	18.8476	55.8938	-1.56831	down	0.00025	0.00406508
gene32880	F56E10.1	Uncharacterized protein	NC_003283.11:104829-118093	10.2027	24.1343	-1.24213	down	0.00445	0.030911
gene40903	F25E2.3	Uncharacterized protein	NC_003284.9:811252-813100	78.5768	6.23581	3.65546	up	0.0002	0.00345935
gene43618	nep-15	Non-coding transcript of protein-coding gene nep-15	NC_003284.9:8372223-8374474	11.4163	0	-	up	5e-05	0.00110206
gene999	ugt-26	UDP-glucuronosyltransferase	NC_003279.8:4721205-4723716	34.2768	6.14153	2.48056	up	0.0019	0.0177989
gene17838	T22D1.5	Uncharacterized protein	NC_003282.8:6903977-6905399	72.1059	229.396	-1.66965	down	0.00045	0.00637744
gene3390	C15C6.1	Uncharacterized protein	NC_003279.8:12202238-12203475	108.819	9.09182	3.58122	up	0.00065	0.0083666
gene20429	memi-2	MEiosis-to-MItosis transition associated	NC_003282.8:13399325-13400505	26.7391	116.526	-2.12363	down	0.00025	0.00406508
gene36247	fshr-1	FSHR (mammalian follicle stimulating hormone receptor) homolog	NC_003283.11:9889959-9894627	33.4882	10.5444	1.66718	up	0.00285	0.022901
gene38630	ZK1037.2	-	NC_003283.11:15312981-15314230	0	1.31006	-	down	5e-05	0.00110206
gene43495	dim-1	Disorganized muscle protein 1	NC_003284.9:8051017-8058212	743.383	75.6792	3.29614	up	5e-05	0.00110206
gene1954	gras-1	GRASP (General Receptor for phosphoinositides 1-Associated Scaffold Protein) homolog	NC_003279.8:7835826-7836712	63.4357	166.156	-1.38917	down	0.00695	0.0411163
gene34928	dpy-11	DumPY: shorter than wild-type	NC_003283.11:6512081-6513345	696.22	295.206	1.23782	up	0.0035	0.0265151
gene19139	C47E12.13	Uncharacterized protein	NC_003282.8:10005569-10006892	0	2.28405	-	down	0.00235	0.0203769
gene36538	T21C9.4	Enhancer of rudimentary homolog	NC_003283.11:10578598-10579026	509.358	1689.77	-1.73007	down	0.00455	0.031421
gene12132	hcp-3	Histone H3-like centromeric protein hcp-3	NC_003281.10:9615435-9616453	45.8286	144.724	-1.65899	down	0.00135	0.0140456
gene35093	unc-68	Uncharacterized protein	NC_003283.11:6902015-6928949	12.2758	4.05108	1.59943	up	0.0008	0.00954063
gene11873	pat-2	Integrin alpha pat-2	NC_003281.10:8818901-8824978	53.6477	10.73	2.32186	up	5e-05	0.00110206
gene5764	lgc-27	Ligand-Gated ion Channel	NC_003280.10:4649177-4653166	71.5379	5.4275	3.72035	up	0.00015	0.0027619
gene4760	btb-6	BTB (Broad/complex/Tramtrack/Bric a brac) domain protein	NC_003280.10:1715328-1716433	1.47484	63.9311	-5.43788	down	0.0018	0.0171731
gene12156	C07A9.2	Protein BUD31 homolog	NC_003281.10:9694804-9695344	162.659	449.476	-1.4664	down	0.0037	0.027342
gene42648	F49E10.2	Uncharacterized protein	NC_003284.9:5890456-5894420	12.4233	0.634809	4.29059	up	0.00025	0.00406508
gene287	Y71G12B.17	Uncharacterized protein	NC_003279.8:1667727-1669750	61.6205	10.5143	2.55106	up	0.0026	0.0216488
gene34922	W01A11.1	Uncharacterized protein	NC_003283.11:6499223-6502365	331.536	125.523	1.40121	up	0.0006	0.00788238
gene5545	sdz-11	SKN-1 Dependent Zygotic transcript	NC_003280.10:3751288-3752278	0	2.90083	-	down	5e-05	0.00110206
gene6611	T19D12.10	Uncharacterized protein	NC_003280.10:6655189-6658812	1.20961	0	-	up	5e-05	0.00110206
gene20259	K08D8.6	Uncharacterized protein	NC_003282.8:12887291-12890500	67.0826	637.494	-3.2484	down	5e-05	0.00110206
gene14396	K08F11.1	Uncharacterized protein	NC_003282.8:4724861-4725313	0	6.10631	-	down	5e-05	0.00110206
gene1327	cdc-7	Cell Division Cycle related	NC_003279.8:5872184-5874132	49.203	125.159	-1.34695	down	0.0058	0.0368834
gene9173	btb-19	BTB (Broad/complex/Tramtrack/Bric a brac) domain protein	NC_003280.10:14521081-14522121	38.6477	117.314	-1.60192	down	0.00315	0.0245028
gene43889	T25B6.4	Uncharacterized protein	NC_003284.9:9015772-9016666	0	15.6642	-	down	0.00145	0.014816
gene11689	F10E9.5	Uncharacterized protein	NC_003281.10:8307657-8308409	51.2231	161.755	-1.65895	down	0.00485	0.032635
gene40898	nas-15	Zinc metalloproteinase nas-15	NC_003284.9:777733-780235	26.9809	0.956781	4.8176	up	0.0008	0.00954063
gene4673	math-45	MATH (meprin-associated Traf homology) domain containing	NC_003280.10:1510320-1517379	7.74562	0.764382	3.34102	up	0.0062	0.0384809
gene46188	ZK662.2	Uncharacterized protein	NC_003284.9:15696761-15697975	190.75	11.3549	4.07029	up	0.00025	0.00406508
gene34289	hil-4	Histone H1.4	NC_003283.11:4754352-4755300	177.502	443.19	-1.32009	down	0.00285	0.022901
gene24495	Y57G11C.499	Uncharacterized protein	NC_003282.8:14754088-14754934	0	1.39864	-	down	0.0001	0.00197766
gene38675	srh-264	Serpentine Receptor, class H	NC_003283.11:15414146-15415349	0	0.984774	-	down	0.00025	0.00406508
gene5918	C27A2.12	Uncharacterized protein	NC_003280.10:5056227-5058113	16.974	1.55918	3.44447	up	0.0027	0.0221472
gene43784	tnt-2	TropoNin T	NC_003284.9:8721763-8723542	636.82	238.915	1.41439	up	0.00115	0.0125072
gene6327	ins-20	INSulin related	NC_003280.10:6010861-6011231	0	46.9904	-	down	5e-05	0.00110206
gene33387	T08B1.1	Uncharacterized protein	NC_003283.11:1982787-1987003	101.193	11.5119	3.13591	up	5e-05	0.00110206
gene2372	aph-1	Gamma-secretase subunit aph-1	NC_003279.8:9232241-9233557	52.9441	135.144	-1.35196	down	0.0076	0.0436209
gene35453	ZK742.7	Uncharacterized protein	NC_003283.11:7798391-7800540	88.6617	0	-	up	0.0008	0.00954063
gene7143	ltd-1	Lim and Transglutaminase Domain	NC_003280.10:8088789-8092689	31.5597	5.59957	2.49469	up	0.00145	0.014816
gene7457	C18E9.5	Uncharacterized protein	NC_003280.10:8970087-8971905	70.8987	18.2778	1.95567	up	0.00255	0.0213614
gene40810	ZK1193.3	Uncharacterized protein	NC_003284.9:417481-420361	13.6065	1.49693	3.18421	up	0.00365	0.0271788
gene9637	orc-3	ORC (Origin Recognition Complex) subunit	NC_003281.10:1208139-1213599	20.3107	63.2321	-1.63842	down	0.00185	0.0174989
gene35677	pos-1	POsterior Segregation	NC_003283.11:8414093-8414940	257.142	1222.9	-2.24967	down	5e-05	0.00110206
gene42365	Y34B4A.9	Uncharacterized protein	NC_003284.9:5255193-5256747	791.577	209.355	1.91878	up	5e-05	0.00110206
gene46154	nipi-3	Protein nipi-3	NC_003284.9:15607971-15610219	28.502	67.4051	-1.2418	down	0.00925	0.0490283
gene9615	exc-6	Excretory canal abnormal protein 6	NC_003281.10:1103223-1111842	14.3192	4.74272	1.59416	up	0.0089	0.0477387
gene36406	lys-3	Lysozyme-like protein 3	NC_003283.11:10282214-10283444	3.23207	453.464	-7.13238	down	0.00025	0.00406508
gene13485	clec-169	C-type LECtin	NC_003282.8:1261325-1264543	20.6123	2.50591	3.0401	up	0.00075	0.00925093
gene40799	nrde-3	Nuclear RNAi defective-3 protein	NC_003284.9:372253-376651	6.87798	25.3812	-1.8837	down	0.00065	0.0083666
gene923	cmt-1	Protein cmt-1	NC_003279.8:4449997-4450923	73.7673	377.872	-2.35684	down	5e-05	0.00110206
gene14368	R105.1	Uncharacterized protein	NC_003282.8:4610900-4638095	112.838	22.9411	2.29824	up	0.007	0.0412793
gene46147	gas-1	Probable NADH dehydrogenase [ubiquinone	NC_003284.9:15587018-15590391	166.487	66.7603	1.31835	up	0.0018	0.0171731
gene13815	Y54G2A.76	Uncharacterized protein	NC_003282.8:2809492-2812743	172.403	4.74227	5.18406	up	0.00705	0.0414707
gene19578	spo-11	Meiotic recombination protein spo-11	NC_003282.8:11123158-11124735	39.6605	103.033	-1.37733	down	0.00405	0.0290718
gene10379	mcm-5	DNA replication licensing factor mcm-5	NC_003281.10:4288383-4291248	72.0082	197.922	-1.4587	down	0.00085	0.0100071
gene7243	F49E12.12	Uncharacterized protein	NC_003280.10:8381502-8383738	18.1961	3.76837	2.27162	up	0.0053	0.0348
gene5154	K12H6.8	Uncharacterized protein	NC_003280.10:2827896-2828567	0	2.93113	-	down	0.00745	0.0430887
gene20390	ttr-45	TransThyretin-Related family domain	NC_003282.8:13254236-13255294	900.185	2680.98	-1.57447	down	0.00015	0.0027619
gene42860	K10C2.1	Carboxypeptidase	NC_003284.9:6421128-6430473	41.6289	16.2696	1.35541	up	0.0018	0.0171731
gene3334	Y53C10A.10	Uncharacterized protein	NC_003279.8:12020778-12028298	4.25843	0.913847	2.2203	up	0.00645	0.0395579
gene4684	fbxb-44	F-box B protein	NC_003280.10:1538890-1539882	0	5.03403	-	down	5e-05	0.00110206
gene38088	aip-1	Arsenite Inducible Protein	NC_003283.11:14012578-14013440	79.6265	247.904	-1.63846	down	0.00365	0.0271788
gene1764	hpo-11	Uncharacterized protein	NC_003279.8:7140277-7147230	43.3745	98.1352	-1.17792	down	0.0068	0.0406502
gene43959	B0563.1	Uncharacterized protein	NC_003284.9:9171561-9172204	0	4.0102	-	down	0.00025	0.00406508
gene32753	gln-5	GLutamiNe synthetase (glutamate-ammonia ligase)	NC_003282.8:17272381-17273633	64.401	282.698	-2.13411	down	5e-05	0.00110206
gene420	zwl-1	Protein zwilch homolog	NC_003279.8:2402234-2409852	39.9207	99.6542	-1.31979	down	0.0021	0.0190682
gene36134	pqn-63	Prion-like-(Q/N-rich)-domain-bearing protein	NC_003283.11:9616055-9617539	28.7386	1.72994	4.0542	up	5e-05	0.00110206
gene36467	col-12	Cuticle collagen 12	NC_003283.11:10424007-10425010	411.229	30.449	3.75548	up	5e-05	0.00110206
gene36072	F36D4.5	Uncharacterized protein	NC_003283.11:9420390-9425716	123.218	274.997	-1.15821	down	0.00425	0.0300001
gene41619	C15C7.7	GDP-fucose protein O-fucosyltransferase 1	NC_003284.9:3165852-3167492	49.606	14.3752	1.78693	up	0.0065	0.0397321
gene34971	cpr-4	Cathepsin B-like cysteine proteinase 4	NC_003283.11:6614711-6615768	2307.27	426.478	2.43564	up	5e-05	0.00110206
gene23389	tag-273	Uncharacterized protein	NC_003282.8:14487219-14505139	47.9842	14.0761	1.76931	up	0.00045	0.00637744
gene42822	col-167	COLlagen	NC_003284.9:6323487-6324393	983.573	28.1672	5.12594	up	5e-05	0.00110206
gene6223	ifb-1	Intermediate filament protein ifb-1	NC_003280.10:5765641-5771691	188.968	56.243	1.7484	up	5e-05	0.00110206
gene19100	dur-1	Dauer down-Regulated	NC_003282.8:9922050-9928222	102.901	25.0835	2.03645	up	0.00595	0.037463
gene39143	F13A7.11	Uncharacterized protein	NC_003283.11:16394077-16395066	5.98906	193.96	-5.01729	down	0.0005	0.00687417
gene46114	tbh-1	Tyramine Beta Hydroxylase	NC_003284.9:15500353-15505373	31.7517	150.781	-2.24754	down	5e-05	0.00110206
gene8473	npp-3	Nuclear Pore complex Protein	NC_003280.10:11865687-11874693	28.2507	69.0528	-1.28941	down	0.00165	0.0162477
gene8407	C47D12.5	Uncharacterized protein	NC_003280.10:11683591-11685271	24.875	76.4203	-1.61926	down	0.00775	0.0441451
gene5258	srg-23	Serpentine receptor class gamma	NC_003280.10:3093901-3094803	0	1.00996	-	down	0.00825	0.0459496
gene8371	F54D5.3	Uncharacterized protein	NC_003280.10:11571805-11572970	1492.35	601.891	1.31001	up	0.002	0.0184435
gene41142	C14E2.11	Uncharacterized protein	NC_003284.9:1801455-1805087	0	1.09362	-	down	5e-05	0.00110206
gene1781	hlh-2	Non-coding transcript of protein-coding gene hlh-2	NC_003279.8:7191239-7193907	4.18369	45.404	-3.43997	down	0.00045	0.00637744
gene33246	sru-27	Serpentine Receptor, class U	NC_003283.11:1499439-1500666	1.08748	0	-	up	0.0001	0.00197766
gene13759	ngn-1	NeuroGeNin	NC_003282.8:2626179-2628214	0	9.51091	-	down	5e-05	0.00110206
gene12032	C40H1.7	Uncharacterized protein	NC_003281.10:9325077-9326992	66.8225	4.48921	3.8958	up	0.0002	0.00345935
gene7183	mig-5	Segment polarity protein dishevelled homolog mig-5	NC_003280.10:8182477-8185008	26.1913	81.9154	-1.64505	down	0.001	0.0113532
gene3798	Y87G2A.1	Uncharacterized protein	NC_003279.8:13514549-13526137	17.4871	51.5646	-1.56009	down	0.00165	0.0162477
gene34094	cyp-35A3	CYtochrome P450 family	NC_003283.11:4022648-4024420	10.0675	1.32984	2.92039	up	0.0077	0.0439814
gene2898	B0511.12	Uncharacterized protein	NC_003279.8:10654453-10666877	20.4405	47.9256	-1.22937	down	0.002	0.0184435
gene4925	C40A11.3	Uncharacterized protein	NC_003280.10:2141129-2142886	0	8.08581	-	down	5e-05	0.00110206
gene8654	F15A4.10	Uncharacterized protein	NC_003280.10:12484650-12485127	0	222.785	-	down	5e-05	0.00110206
gene35221	fkb-3	Peptidyl-prolyl cis-trans isomerase	NC_003283.11:7225368-7226229	239.494	30.4907	2.97355	up	0.0001	0.00197766
gene8026	C14A4.7	Uncharacterized protein	NC_003280.10:10595330-10596562	53.0329	8.12103	2.70715	up	0.00565	0.0362498
gene46245	F53H4.3	Uncharacterized protein	NC_003284.9:15885715-15887586	31.9066	3.66806	3.12076	up	0.0035	0.0265151
gene13760	mdf-2	MAD (yeast Mitosis arrest DeFicient) related	NC_003282.8:2636549-2641010	89.4181	244.918	-1.45366	down	0.00475	0.0321057
gene5757	pqn-35	Prion-like-(Q/N-rich)-domain-bearing protein	NC_003280.10:4613060-4625892	54.2696	9.38279	2.53206	up	0.001	0.0113532
gene18032	C42D4.13	Uncharacterized protein	NC_003282.8:7187380-7188060	153.433	7.05198	4.44344	up	0.0004	0.00586466
gene42679	F22F4.4	Uncharacterized protein	NC_003284.9:5998425-6000435	126347	33527	1.91399	up	0.00675	0.0406502
gene34343	H23N18.5	Uncharacterized protein	NC_003283.11:4911784-4912380	3091.34	64.4948	5.58291	up	0.0003	0.00471148
gene15413	elo-6	Elongation of very long chain fatty acids protein 6	NC_003282.8:5386723-5388553	835.399	97.8928	3.09319	up	5e-05	0.00110206
gene34603	F25B4.5	Uncharacterized protein	NC_003283.11:5678873-5682630	44.4722	117.595	-1.40285	down	0.00115	0.0125072
gene45653	K04C1.5	Uncharacterized protein	NC_003284.9:14248193-14249589	12.0803	114.122	-3.23985	down	5e-05	0.00110206
gene45146	C52G5.2	Uncharacterized protein	NC_003284.9:12843380-12845262	265.729	36.6701	2.85728	up	5e-05	0.00110206
gene1442	T09B4.2	Uncharacterized protein	NC_003279.8:6184086-6185235	44.1193	118.939	-1.43074	down	0.00425	0.0300001
gene42689	C09B8.4	Uncharacterized protein	NC_003284.9:6018480-6019933	23.0844	4.13599	2.48061	up	0.0036	0.0269886
gene5543	fbxb-90	F-box B protein	NC_003280.10:3747783-3748796	0	9.76798	-	down	5e-05	0.00110206
gene41323	T10H10.2	Sulfhydryl oxidase	NC_003284.9:2294749-2297967	27.8291	6.22885	2.15956	up	0.00375	0.0274906
gene8699	lips-15	LIPaSe related	NC_003280.10:12605975-12606991	6.73589	70.5306	-3.38831	down	0.0004	0.00586466
gene9398	F40G9.18	Uncharacterized protein	NC_003281.10:167384-169556	0	2.20208	-	down	5e-05	0.00110206
gene40892	trap-2	Translocon-associated protein subunit beta	NC_003284.9:767270-768065	871.272	353.069	1.30317	up	0.0031	0.0242277
gene3783	spr-5	Probable lysine-specific histone demethylase 1	NC_003279.8:13438067-13449930	22.6031	53.6571	-1.24725	down	0.0069	0.0409522
gene10148	npp-9	Nuclear Pore complex Protein	NC_003281.10:3400990-3404263	94.5595	250.087	-1.40314	down	0.0016	0.0158972
gene5094	F22E5.17	Uncharacterized protein	NC_003280.10:2678058-2679091	10.589	52.4682	-2.30888	down	0.00135	0.0140456
gene6657	F41G3.3	Uncharacterized protein	NC_003280.10:6756475-6758921	8.05578	0.569502	3.82225	up	0.00245	0.0209694
gene11836	sdz-1	Skn-1 dependent zygotic transcript 1 protein	NC_003281.10:8699565-8700333	0	3.83961	-	down	5e-05	0.00110206
gene7664	mex-6	Zinc finger protein mex-6	NC_003280.10:9524180-9525875	97.5172	284.328	-1.54383	down	0.0004	0.00586466
gene32844	elo-2	Elongation of very long chain fatty acids protein	NC_003282.8:17466264-17467399	242.636	72.0638	1.75144	up	0.0007	0.00881148
gene18883	hsp-12.3	Heat Shock Protein	NC_003282.8:9444897-9445279	611.242	35.2495	4.11607	up	0.00205	0.018779
gene15266	msp-113	Major sperm protein 19/31/40/45/50/51/53/59/61/65/81/113/142	NC_003282.8:5297961-5298345	1079.89	275.719	1.96961	up	0.0005	0.00687417
gene39335	F09C6.14	Uncharacterized protein	NC_003283.11:16880993-16881315	0	22.3416	-	down	0.0087	0.0470932
gene34654	nstp-3	Nucleotide Sugar TransPorter family	NC_003283.11:5794862-5798128	17.965	1.10316	4.02547	up	0.006	0.0376633
gene41325	hum-6	Unconventional myosin heavy chain 6	NC_003284.9:2303120-2314652	11.3379	2.06471	2.45714	up	0.00035	0.00529575
gene4508	F45D11.5	Uncharacterized protein	NC_003280.10:1001988-1002437	0	6.76349	-	down	0.00015	0.0027619
gene19796	inx-8	Innexin-8	NC_003282.8:11673872-11675458	48.0111	165.521	-1.78558	down	0.0005	0.00687417
gene336	Y51F10.7	Uncharacterized protein	NC_003279.8:1895234-1922952	2292.9	175.804	3.70513	up	0.00015	0.0027619
gene10693	alh-1	ALdehyde deHydrogenase	NC_003281.10:5077765-5080505	635.282	267.275	1.24907	up	0.0042	0.0297487
gene46340	sdc-1	Zinc finger protein sdc-1	NC_003284.9:16275772-16282300	3.29402	14.2716	-2.11522	down	0.0019	0.0177989
gene40177	Y39B6A.1	Uncharacterized protein	NC_003283.11:19201181-19203597	134.979	2.80983	5.58611	up	5e-05	0.00110206
gene34218	grl-5	GRound-Like (grd related)	NC_003283.11:4412878-4414575	348.939	6.14789	5.82674	up	0.0007	0.00881148
gene10680	C45G9.14	Uncharacterized protein	NC_003281.10:5045096-5045653	3.52702	0	-	up	0.00015	0.0027619
gene6056	EEED8.18	Uncharacterized protein	NC_003280.10:5412217-5412607	0	195.631	-	down	0.00155	0.0155028
gene39294	clec-34	C-type LECtin	NC_003283.11:16735764-16737404	1.489	0	-	up	5e-05	0.00110206
gene1783	col-61	COLlagen	NC_003279.8:7202241-7203508	13.1101	1.70131	2.94596	up	0.0077	0.0439814
gene43507	dao-3	Dauer or Aging adult Overexpression	NC_003284.9:8084412-8086549	127.128	41.9313	1.60018	up	0.00275	0.0224019
gene19953	T12G3.6	Uncharacterized protein	NC_003282.8:12030255-12031271	60.0541	391.658	-2.70526	down	5e-05	0.00110206
gene5506	sea-1	T-box transcription factor 18	NC_003280.10:3672016-3673590	1.985	40.1832	-4.33938	down	0.00075	0.00925093
gene938	zig-9	2 (Zwei) IG domain protein	NC_003279.8:4537831-4539707	101.236	10.2882	3.29866	up	0.0001	0.00197766
gene45193	scav-4	SCAVenger receptor (CD36 family) related	NC_003284.9:12981860-12985754	15.0793	0.767617	4.29604	up	0.0017	0.0164851
gene40608	F26F2.5	Uncharacterized protein	NC_003283.11:20573716-20574000	0	82.9224	-	down	0.00115	0.0125072
gene45740	nspc-20	Nematode Specific Peptide family, grodown C	NC_003284.9:14529825-14530179	3909.9	659.657	2.56734	up	0.00025	0.00406508
gene2084	F52B5.7	Uncharacterized protein	NC_003279.8:8313320-8315318	4.38182	25.7608	-2.55558	down	0.0036	0.0269886
gene12945	Y37D8A.3	Uncharacterized protein	NC_003281.10:12829369-12837130	103.641	26.9318	1.94421	up	0.00095	0.0109508
gene10639	fsn-1	F-box/SPRY domain-containing protein 1	NC_003281.10:4937360-4939138	56.5174	135.625	-1.26285	down	0.0093	0.0491516
gene38964	T10C6.5	Protein CWC15 homolog	NC_003283.11:16023354-16024094	198.623	470.693	-1.24476	down	0.00535	0.0349206
gene30	mex-3	Muscle EXcess	NC_003279.8:127296-133582	63.9992	291.182	-2.1858	down	5e-05	0.00110206
gene5904	msp-71	-	NC_003280.10:5012873-5013275	1726.29	468.066	1.88289	up	0.00035	0.00529575
gene37517	W04D2.4	Uncharacterized protein	NC_003283.11:12494832-12497754	41.8541	93.5804	-1.16084	down	0.0094	0.0495694
gene5707	mlt-7	Peroxidase mlt-7 light chain	NC_003280.10:4393029-4404533	67.9042	14.4503	2.2324	up	5e-05	0.00110206
gene12514	klp-7	Kinesin-like protein	NC_003281.10:10805929-10810750	32.3093	75.85	-1.2312	down	0.00435	0.0304721
gene37702	T16G1.4	Uncharacterized protein	NC_003283.11:12940037-12941784	28.2796	2.08198	3.76374	up	0.0015	0.0151584
gene5735	sra-35	Serpentine Receptor, class A (alpha)	NC_003280.10:4524633-4527900	0	1.35511	-	down	0.00025	0.00406508
gene11320	K04G7.1	Uncharacterized protein	NC_003281.10:7162753-7164839	25.6515	96.5356	-1.91202	down	0.0001	0.00197766
gene10559	rbg-3	RaB GAP related	NC_003281.10:4754618-4756780	67.7411	150.522	-1.15187	down	0.0053	0.0348
gene46664	mlc-2	Myosin regulatory light chain 2	NC_003284.9:17455900-17456567	4175.44	1422.11	1.5539	up	0.0007	0.00881148
gene8695	Y38E10A.3	Uncharacterized protein	NC_003280.10:12574036-12574768	0	6.63409	-	down	5e-05	0.00110206
gene10815	mlc-3	Myosin Light Chain	NC_003281.10:5565131-5566958	2920.55	923.436	1.66116	up	0.0001	0.00197766
gene38421	ZC412.3	Uncharacterized protein	NC_003283.11:14868649-14871428	76.5597	16.2589	2.23536	up	0.0024	0.0206697
gene5265	clec-123	C-type LECtin	NC_003280.10:3114289-3116714	36.0436	11.2709	1.67714	up	0.00515	0.0340992
gene19146	ent-7	Non-coding transcript of protein-coding gene ent-7	NC_003282.8:10017424-10021222	67.496	10.2079	2.72512	up	0.00065	0.0083666
gene4402	T02H6.5	Uncharacterized protein	NC_003280.10:685233-688890	0	1.34806	-	down	0.00015	0.0027619
gene4921	sdz-28	SKN-1 Dependent Zygotic transcript	NC_003280.10:2131084-2132261	1.21303	36.3384	-4.90481	down	0.00255	0.0213614
gene6111	ZK177.1	Uncharacterized protein	NC_003280.10:5528148-5529269	2.88634	31.1167	-3.43038	down	0.0005	0.00687417
gene32527	col-138	COLlagen	NC_003282.8:17176496-17189647	1958.21	43.4556	5.49385	up	5e-05	0.00110206
gene33015	ZK488.6	Uncharacterized protein	NC_003283.11:590481-592463	13.1471	0	-	up	5e-05	0.00110206
gene8355	F54D5.12	Uncharacterized protein	NC_003280.10:11538975-11540630	208.377	87.513	1.25163	up	0.0034	0.0259595
gene10227	wdr-5.1	WD repeat-containing protein wdr-5.1	NC_003281.10:3705286-3706577	73.2514	165.935	-1.17969	down	0.00765	0.0438016
gene33225	ges-1	Gut esterase 1	NC_003283.11:1427706-1432137	102.05	8.10151	3.65495	up	5e-05	0.00110206
gene44765	col-180	COLlagen	NC_003284.9:11711377-11712280	410.426	8.47839	5.59719	up	5e-05	0.00110206
gene1549	C55B7.3	Protein-tyrosine-phosphatase	NC_003279.8:6500029-6501360	54.0135	9.60681	2.49119	up	0.0028	0.0226976
gene18276	klo-1	KLOtho (mammalian aging-associated protein) homolog	NC_003282.8:7746031-7747988	58.6028	14.9294	1.97281	up	0.00135	0.0140456
gene2953	C35E7.5	Uncharacterized protein	NC_003279.8:10823380-10828245	1.00997	40.1972	-5.31472	down	5e-05	0.00110206
gene864	swsn-2.2	SWI/SNF nucleosome remodeling complex component	NC_003279.8:4210996-4212512	33.8702	95.9996	-1.50301	down	0.00245	0.0209694
gene35987	gad-3	Probable aldehyde oxidase gad-3	NC_003283.11:9168443-9173001	29.12	8.04874	1.85517	up	0.00065	0.0083666
gene6139	T25E4.1	Uncharacterized protein	NC_003280.10:5578361-5579725	102.749	2.06827	5.63456	up	0.00475	0.0321057
gene37220	sodh-1	Alcohol dehydrogenase 1	NC_003283.11:11888295-11889437	2960.45	368.769	3.00502	up	5e-05	0.00110206
gene19591	C08F8.15	Uncharacterized protein	NC_003282.8:11159690-11160791	0	4.42613	-	down	5e-05	0.00110206
gene2436	C17E4.6	Uncharacterized protein	NC_003279.8:9422565-9430586	28.9489	86.8924	-1.58572	down	0.0012	0.0129489
gene12418	D2045.2	Uncharacterized protein	NC_003281.10:10452896-10460550	18.3772	42.7752	-1.21886	down	0.0047	0.0320293
gene6236	acdh-8	Acyl CoA DeHydrogenase	NC_003280.10:5794554-5796132	59.0739	14.9729	1.98017	up	0.0009	0.010484
gene5558	T24E12.13	Uncharacterized protein	NC_003280.10:3787460-3788479	0	3.02486	-	down	5e-05	0.00110206
gene5942	F09C12.2	Mitogen-activated protein kinase	NC_003280.10:5110028-5112232	1.51757	0	-	up	5e-05	0.00110206
gene45336	C49F8.3	Uncharacterized protein	NC_003284.9:13386223-13387542	332.699	17.2946	4.26582	up	0.00015	0.0027619
gene20412	mex-5	Zinc finger protein mex-5	NC_003282.8:13353729-13355543	110.778	512.191	-2.20901	down	5e-05	0.00110206
gene34623	K09H11.4	Uncharacterized protein	NC_003283.11:5723078-5726545	5.78079	0.304127	4.24852	up	0.00715	0.0418212
gene12363	Y70G10A.1	-	NC_003281.10:10223523-10224162	0	1.84673	-	down	5e-05	0.00110206
gene43407	ZK154.5	Uncharacterized protein	NC_003284.9:7783436-7787925	4.17765	12.5571	-1.58774	down	0.00895	0.0479293
gene10699	dpy-17	DumPY: shorter than wild-type	NC_003281.10:5107332-5108443	1.70556	121.352	-6.15281	down	0.0003	0.00471148
gene5358	F39E9.1	-	NC_003280.10:3318301-3320358	0.860936	29.5031	-5.09882	down	0.003	0.0237149
gene34749	F29G9.7	Uncharacterized protein	NC_003283.11:6035396-6037356	1.525	16.5616	-3.44096	down	0.0055	0.0356048
gene37353	rnp-1	RNP (RRM RNA binding domain) containing	NC_003283.11:12192274-12194164	75.8665	197.691	-1.38172	down	0.0019	0.0177989
gene34223	skr-14	SKp1 Related (ubiquitin ligase complex component)	NC_003283.11:4421068-4421575	2.67805	105.68	-5.30238	down	0.00825	0.0459496
gene13500	col-105	COLlagen	NC_003282.8:1357815-1359225	1.8743	0	-	up	5e-05	0.00110206
gene5390	T06D4.1	Uncharacterized protein	NC_003280.10:3381835-3383787	12.1363	62.373	-2.36159	down	0.0001	0.00197766
gene33616	C24B9.3	Uncharacterized protein	NC_003283.11:2707028-2711532	254.532	50.5528	2.33198	up	5e-05	0.00110206
gene16965	zen-4	Kinesin-like protein	NC_003282.8:6118223-6121436	46.1496	109.459	-1.24601	down	0.00285	0.022901
gene45532	meg-2	Uncharacterized protein	NC_003284.9:13923071-13926108	1.39095	15.3234	-3.4616	down	0.0005	0.00687417
gene5557	T24E12.1	Uncharacterized protein	NC_003280.10:3785574-3786530	3.96782	30.4435	-2.93972	down	0.0058	0.0368834
gene35981	col-144	COLlagen	NC_003283.11:9159694-9160627	685.026	46.2528	3.88855	up	5e-05	0.00110206
gene34776	ceh-49	One cut domain family member	NC_003283.11:6118512-6120201	6.48467	48.8568	-2.91346	down	0.0015	0.0151584
gene8401	nep-1	Neprilysin-1	NC_003280.10:11654472-11657167	86.2142	24.3346	1.82492	up	0.00035	0.00529575
gene38011	F55B12.11	-	NC_003283.11:13825612-13827051	0	1.56967	-	down	5e-05	0.00110206
gene38458	F02D8.9	Uncharacterized protein	NC_003283.11:14955020-14955774	0	2.41153	-	down	0.0087	0.0470932
gene380	ule-1	Uterine Lumin Expressed/locailized	NC_003279.8:2219545-2222293	23.1104	488.259	-4.40103	down	5e-05	0.00110206
gene4749	fbxb-19	F-box B protein	NC_003280.10:1688234-1689172	0	2.6379	-	down	5e-05	0.00110206
gene19422	grl-21	GRound-Like (grd related)	NC_003282.8:10737492-10738054	221.049	18.6079	3.57037	up	0.00025	0.00406508
gene5928	dsh-2	DiSHevelled related	NC_003280.10:5078428-5081157	23.5991	78.9083	-1.74144	down	0.0004	0.00586466
gene33809	apx-1	Non-coding transcript of protein-coding gene apx-1	NC_003283.11:3210228-3222449	21.6896	82.3524	-1.92481	down	0.00045	0.00637744
gene34622	rga-3	Rho GTPase Activating protein	NC_003283.11:5717904-5721583	15.5349	43.4622	-1.48425	down	0.0023	0.0202726
gene46600	T08G2.2	Uncharacterized protein	NC_003284.9:17205428-17209365	14.7108	2.28436	2.68702	up	0.0067	0.0406097
gene12878	pie-1	Pharynx and intestine in excess protein 1	NC_003281.10:12426892-12429087	26.2913	108.47	-2.04464	down	0.0003	0.00471148
gene44378	F59F5.7	Uncharacterized protein	NC_003284.9:10559627-10566525	5.37495	0.599584	3.16422	up	0.00365	0.0271788
gene19262	Y43C5A.2	Uncharacterized protein	NC_003282.8:10269899-10272631	295.69	66.8617	2.14483	up	5e-05	0.00110206
gene14038	madf-9	MADF domain transcription factor	NC_003282.8:3637079-3639820	21.2572	4.35745	2.2864	up	0.0079	0.0446767
gene34969	ZK1055.7	Uncharacterized protein	NC_003283.11:6602775-6605373	29.6699	112.022	-1.9167	down	0.00015	0.0027619
gene5003	F16G10.6	Uncharacterized protein	NC_003280.10:2377198-2377839	0	3.2926	-	down	0.0039	0.0283268
gene40361	Y116F11A.1	ATP-dependent DNA helicase	NC_003283.11:19730794-19731999	0	5.36234	-	down	5e-05	0.00110206
gene9508	pat-12	Protein pat-12	NC_003281.10:727638-752400	106.073	39.1834	1.43674	up	0.0085	0.0467444
gene215	aps-3	AdaPtin, Small chain (clathrin associated complex)	NC_003279.8:1155401-1156020	116.143	296.264	-1.35098	down	0.0095	0.0499059
gene35765	asp-13	ASpartyl Protease	NC_003283.11:8641619-8643190	791.394	51.9874	3.92816	up	5e-05	0.00110206
gene7643	chil-23	Non-coding transcript of protein-coding gene chil-23	NC_003280.10:9466959-9468472	17.1888	2.14222	3.00429	up	0.00535	0.0349206
gene5128	fbxb-106	F-box B protein	NC_003280.10:2762416-2763477	0	4.32909	-	down	5e-05	0.00110206
gene9687	fbxa-26	F-box A protein	NC_003281.10:1340615-1342494	19.8286	2.38668	3.05451	up	0.0034	0.0259595
gene1536	knl-2	Kinetochore NuLl	NC_003279.8:6460990-6464096	28.2765	64.6429	-1.19289	down	0.0059	0.0372758
gene11604	plk-1	Serine/threonine-protein kinase plk-1	NC_003281.10:8101347-8103727	76.7317	170.345	-1.15056	down	0.00495	0.0331462
gene43375	C53C9.2	Uncharacterized protein	NC_003284.9:7686939-7688851	132.919	34.7763	1.93437	up	0.0003	0.00471148
gene6023	F09E5.14	Uncharacterized protein	NC_003280.10:5342857-5344852	0	106.02	-	down	0.001	0.0113532
gene12140	gei-13	Gex-3-interacting protein 13	NC_003281.10:9632855-9637097	22.277	4.74992	2.22958	up	0.0009	0.010484
gene36543	T21C9.9	Uncharacterized protein	NC_003283.11:10590838-10592576	81.226	3.67975	4.46426	up	0.0005	0.00687417
gene14786	srm-1	Serpentine Receptor, class M	NC_003282.8:5012548-5014604	0	1.05217	-	down	0.0002	0.00345935
gene36623	F28H7.3	Uncharacterized protein	NC_003283.11:10749667-10750701	331.831	60.2196	2.46215	up	5e-05	0.00110206
gene34050	cyp-35A5	CYtochrome P450 family	NC_003283.11:3936395-3938425	9.904	1.61408	2.6173	up	0.00615	0.0382854
gene99	Y65B4BL.1	Uncharacterized protein	NC_003279.8:530987-532852	119.486	22.9524	2.38013	up	0.0001	0.00197766
gene35658	mom-2	Protein mom-2	NC_003283.11:8356097-8357847	33.0844	138.687	-2.06761	down	0.0003	0.00471148
gene4723	C08E3.13	Uncharacterized protein	NC_003280.10:1632027-1632311	0	198.9	-	down	5e-05	0.00110206
gene7825	nlt-1	Non-specific lipid-transfer protein-like 1	NC_003280.10:10000404-10001102	1346.33	501.978	1.42333	up	0.0046	0.0315165
gene43308	PDB1.1	Uncharacterized protein	NC_003284.9:7556866-7558978	103.311	10.8913	3.24575	up	0.0002	0.00345935
gene5736	sra-32	Serpentine receptor class alpha-32	NC_003280.10:4529891-4531964	0	3.02945	-	down	5e-05	0.00110206
gene5430	fbxb-104	F-box B protein	NC_003280.10:3475673-3477188	0	7.14508	-	down	5e-05	0.00110206
gene26	F53G12.8	Uncharacterized protein	NC_003279.8:113806-114681	84.5265	18.5396	2.18879	up	0.0059	0.0372758
gene44302	R07E3.6	Uncharacterized protein	NC_003284.9:10317880-10321674	18.9886	0.770768	4.6227	up	0.00015	0.0027619
gene8800	hphd-1	Probable hydroxyacid-oxoacid transhydrogenase, mitochondrial	NC_003280.10:12994466-12996192	843.767	47.1548	4.16137	up	5e-05	0.00110206
gene44832	Y62H9A.4	Uncharacterized protein	NC_003284.9:11880141-11881172	51.2746	423.125	-3.04477	down	5e-05	0.00110206
gene20304	K10D11.5	Uncharacterized protein	NC_003282.8:12989725-12991780	24.7332	225.097	-3.18602	down	5e-05	0.00110206
gene35668	hsp-17	Heat Shock Protein	NC_003283.11:8384893-8385914	293.162	769.574	-1.39236	down	0.00405	0.0290718
gene4496	fbxc-17	Non-coding transcript of protein-coding gene fbxc-17	NC_003280.10:976207-978946	0	1.67833	-	down	0.00035	0.00529575
gene3618	Y18D10A.11	Uncharacterized protein	NC_003279.8:12862237-12863435	69.5886	222.023	-1.67378	down	0.0014	0.0144568
gene13444	perm-4	PERMeable eggshell	NC_003282.8:1121581-1125085	342.551	1743.51	-2.3476	down	5e-05	0.00110206
gene13255	spl-1	Sphingosine-1-phosphate lyase	NC_003282.8:380017-383179	119.119	48.8012	1.28742	up	0.0044	0.0306795
gene4476	R07C3.17	Unclassified non-coding RNA R07C3.17	NC_003280.10:928735-928969	67.8678	0	-	up	0.0068	0.0406502
gene17168	C49A9.4	Uncharacterized protein	NC_003282.8:6219725-6221848	19.5772	2.03196	3.26823	up	0.0029	0.0232014
gene6665	T13C2.6	Uncharacterized protein	NC_003280.10:6783468-6787696	98.1525	248.37	-1.33939	down	0.00165	0.0162477
gene43890	T25B6.5	Uncharacterized protein	NC_003284.9:9020587-9021719	5.88589	0	-	up	0.0008	0.00954063
gene2029	K04G2.10	Uncharacterized protein	NC_003279.8:8057761-8060478	2.80699	42.5565	-3.92229	down	0.00045	0.00637744
gene44594	C34F6.1	Uncharacterized protein	NC_003284.9:11192831-11196834	10.5284	0.482001	4.4491	up	0.0019	0.0177989
gene36330	C08B6.4	Uncharacterized protein	NC_003283.11:10114880-10117411	7.43601	1.1773	2.65904	up	0.00875	0.0471787
gene3343	ksr-2	Kinase sdownpressor of Ras B	NC_003279.8:12047884-12059782	18.3221	48.9835	-1.41871	down	0.0093	0.0491516
gene20269	K08D8.4	Uncharacterized protein	NC_003282.8:12907546-12909979	2.80154	15.7542	-2.49144	down	0.00705	0.0414707
gene46190	ZK662.6	Uncharacterized protein	NC_003284.9:15718701-15720319	73.0969	5.07528	3.84825	up	0.00355	0.0267227
gene36685	F32D8.7	Uncharacterized protein	NC_003283.11:10898789-10900544	39.7954	3.19316	3.63955	up	0.0007	0.00881148
gene40983	lmp-2	LAMP (lysosome-associated membrane protein) homolog	NC_003284.9:1125762-1128220	32.3734	7.67448	2.07667	up	0.00865	0.0470843
gene1397	T27A3.5	Protein-tyrosine-phosphatase	NC_003279.8:6100379-6101681	55.8714	10.4964	2.41221	up	0.00135	0.0140456
gene5751	vab-1	Ephrin receptor 1	NC_003280.10:4572088-4590512	20.7128	57.8552	-1.48193	down	0.0007	0.00881148
gene42690	C09B8.5	Uncharacterized protein	NC_003284.9:6021049-6022457	1.87074	16.1816	-3.11268	down	0.00695	0.0411163
gene3908	gadr-5	Uncharacterized protein	NC_003279.8:13984307-13989588	0.325778	3.25298	-3.3198	down	0.0076	0.0436209
gene4764	fbxb-11	F-box B protein	NC_003280.10:1724659-1725692	0	5.51012	-	down	5e-05	0.00110206
gene32495	skr-12	SKp1 Related (ubiquitin ligase complex component)	NC_003282.8:17167273-17167792	2.72363	42.3162	-3.95761	down	0.00635	0.0391623
gene4938	gba-1	Putative glucosylceramidase 1	NC_003280.10:2176946-2181885	65.2089	16.6237	1.97183	up	0.00025	0.00406508
gene6805	gld-3	Defective in germ line development protein 3	NC_003280.10:7132642-7136868	59.5318	180.2	-1.59787	down	0.00025	0.00406508
gene87	haf-4	HAlF transporter (PGP related)	NC_003279.8:490050-496067	62.5294	12.1897	2.35887	up	5e-05	0.00110206
gene14883	msp-53	Major sperm protein 19/31/40/45/50/51/53/59/61/65/81/113/142	NC_003282.8:5064677-5065061	1179.4	345.523	1.7712	up	0.00065	0.0083666
gene10264	cyp-25A2	CYtochrome P450 family	NC_003281.10:3835220-3837150	56.3193	5.58685	3.33352	up	0.00045	0.00637744
gene34051	cyp-35B1	CYtochrome P450 family	NC_003283.11:3939126-3941184	13.0896	1.17038	3.48336	up	0.00225	0.0200561
gene7737	cutl-2	CUTiclin-Like	NC_003280.10:9721838-9724526	0	7.72991	-	down	5e-05	0.00110206
gene35063	col-143	COLlagen	NC_003283.11:6835653-6836663	66.9646	173.997	-1.37759	down	0.00235	0.0203769
gene3550	H16D19.4	-	NC_003279.8:12641602-12642187	0	2.14344	-	down	0.0035	0.0265151
gene10318	his-70	Histone H3.3-like type 1	NC_003281.10:4059714-4060119	153.253	22.5538	2.76447	up	0.00435	0.0304721
gene36078	H24G06.1	Uncharacterized protein	NC_003283.11:9446172-9460314	45.5179	17.4803	1.3807	up	0.0043	0.0302499
gene19780	ttr-50	TransThyretin-Related family domain	NC_003282.8:11640300-11640997	13.5214	523.625	-5.27522	down	5e-05	0.00110206
gene40621	ttr-57	TransThyretin-Related family domain	NC_003283.11:20605217-20605698	34.8986	0	-	up	0.00235	0.0203769
gene11050	C18F10.7	Uncharacterized protein	NC_003281.10:6276243-6278346	50.8392	127.253	-1.32368	down	0.00255	0.0213614
gene38151	ZC376.3	Uncharacterized protein	NC_003283.11:14168447-14171377	18.6769	2.8656	2.70434	up	0.0019	0.0177989
gene8495	hmg-12	HMG	NC_003280.10:11916513-11917511	179.282	402.445	-1.16656	down	0.0068	0.0406502
gene2431	C17E4.20	Uncharacterized protein	NC_003279.8:9414576-9416505	4.24299	35.9349	-3.08223	down	0.0011	0.012147
gene35315	F25E5.2	Uncharacterized protein	NC_003283.11:7455826-7457450	9.93817	1.09547	3.18143	up	0.0073	0.0423989
gene18824	hum-9	Heavy chain, Unconventional Myosin	NC_003282.8:9274546-9282996	8.16819	1.86895	2.12779	up	0.0077	0.0439814
gene11688	F10E9.7	Uncharacterized protein	NC_003281.10:8305838-8306286	157.237	696.507	-2.14719	down	0.00115	0.0125072
gene2846	dhhc-12	Palmitoyltransferase	NC_003279.8:10522151-10523905	28.3991	5.9145	2.26352	up	0.00575	0.0366781
gene8892	E01G4.6	Uncharacterized protein	NC_003280.10:13482405-13485667	354.551	8.1132	5.44958	up	5e-05	0.00110206
gene36705	F17C11.11	Uncharacterized protein	NC_003283.11:10937695-10938809	39.6336	305.54	-2.94657	down	5e-05	0.00110206
gene32660	Y116A8B.98	Unclassified non-coding RNA Y116A8B.98	NC_003282.8:17220002-17220816	0	2.00506	-	down	0.0008	0.00954063
gene38452	C30G7.3	Uncharacterized protein	NC_003283.11:14942174-14945605	47.8582	13.1233	1.86663	up	0.0093	0.0491516
gene35420	ZK105.1	Uncharacterized protein	NC_003283.11:7713999-7714660	21.1399	662.557	-4.97	down	5e-05	0.00110206
gene33262	F52F10.2	Uncharacterized protein	NC_003283.11:1548265-1550464	18.5143	1.08281	4.0958	up	0.00215	0.0194369
gene44831	Y62H9A.3	Uncharacterized protein	NC_003284.9:11879162-11879944	58.238	380.91	-2.70942	down	5e-05	0.00110206
gene7561	C01G6.3	Uncharacterized protein	NC_003280.10:9269893-9271152	16.019	287.454	-4.16548	down	5e-05	0.00110206
gene40894	T04G9.7	Uncharacterized protein	NC_003284.9:770845-771832	405.569	1710.81	-2.07666	down	5e-05	0.00110206
gene33180	ptr-16	PaTched Related family	NC_003283.11:1165710-1174814	21.1445	0.928423	4.50936	up	0.0019	0.0177989
gene9395	ver-1	Protein ver-1	NC_003281.10:156823-163542	0	1.18446	-	down	5e-05	0.00110206
gene18091	F42C5.3	Uncharacterized protein	NC_003282.8:7286181-7287526	1.69311	38.8594	-4.52051	down	0.00075	0.00925093
gene9059	daf-5	Uncharacterized protein	NC_003280.10:14033836-14037714	11.1451	29.715	-1.41479	down	0.00755	0.0434243
gene2999	Y95D11A.3	Uncharacterized protein	NC_003279.8:10940684-10943922	44.4991	122.33	-1.45893	down	0.0061	0.03806
gene35388	F07C4.6	Uncharacterized protein	NC_003283.11:7626849-7627720	22.8125	0	-	up	5e-05	0.00110206
gene18816	Y11D7A.9	Uncharacterized protein	NC_003282.8:9254259-9256099	171.592	4.78918	5.16306	up	0.00035	0.00529575
gene35624	C16D9.9	Uncharacterized protein	NC_003283.11:8264360-8264595	0	208.03	-	down	0.0087	0.0470932
gene39544	sdz-16	SKN-1 Dependent Zygotic transcript	NC_003283.11:17326567-17327921	0	5.65216	-	down	5e-05	0.00110206
gene7642	chil-22	CHItinase-Like	NC_003280.10:9464586-9466186	27.0947	0.744977	5.18467	up	0.0092	0.0488728
gene40196	F21D9.11	Uncharacterized protein	NC_003283.11:19252180-19253054	0	1.50099	-	down	5e-05	0.00110206
gene23726	Y57G11B.5	Uncharacterized protein	NC_003282.8:14574824-14576540	85.2493	540.903	-2.66561	down	5e-05	0.00110206
gene19025	msp-78	Major sperm protein 78	NC_003282.8:9770045-9770429	950.353	366.025	1.37652	up	0.00515	0.0340992
gene40299	Y43F8B.1	Uncharacterized protein	NC_003283.11:19535110-19546168	152.934	42.7976	1.83731	up	0.0011	0.012147
gene11835	B0303.7	Uncharacterized protein	NC_003281.10:8693654-8699194	17.6383	49.7712	-1.4966	down	0.00775	0.0441451
gene11255	rfc-4	Replication factor C subunit 4	NC_003281.10:6972259-6973615	138.368	363.603	-1.39386	down	0.0013	0.0137063
gene6891	Y9D1A.1	Uncharacterized protein	NC_003280.10:7446671-7448542	2.14113	14.4421	-2.75383	down	0.00175	0.0168417
gene7463	C18E9.8	Uncharacterized protein	NC_003280.10:8986019-8988021	20.0229	5.09723	1.97387	up	0.0092	0.0488728
gene14169	C35B1.5	Uncharacterized protein	NC_003282.8:4083663-4084190	513.952	157.695	1.7045	up	0.002	0.0184435
gene40785	R57.2	Uncharacterized protein	NC_003284.9:297247-299177	33.2302	3.57894	3.21489	up	0.00595	0.037463
gene2228	pqn-26	Prion-like-(Q/N-rich)-domain-bearing protein	NC_003279.8:8771433-8777511	15.7852	0.976433	4.0149	up	0.0007	0.00881148
gene3742	T04D3.1	Uncharacterized protein	NC_003279.8:13302867-13304292	3.38927	24.2075	-2.83641	down	0.00175	0.0168417
gene42238	add-1	Adducin-related protein 1	NC_003284.9:4854252-4860036	10.3218	1.39534	2.88701	up	0.0013	0.0137063
gene7271	zyg-9	Zygote defective protein 9	NC_003280.10:8457820-8464249	37.8327	85.2159	-1.17149	down	0.0052	0.0343478
gene40821	aagr-4	Acid Alpha Glucosidase Relate	NC_003284.9:460653-466783	93.2482	13.2823	2.81157	up	5e-05	0.00110206
gene1495	col-58	COLlagen	NC_003279.8:6311277-6312338	116.545	3.24418	5.16689	up	5e-05	0.00110206
gene42395	C26B9.2	Uncharacterized protein	NC_003284.9:5340338-5342147	14.7958	0	-	up	5e-05	0.00110206
gene44444	ttr-14	TransThyretin-Related family domain	NC_003284.9:10787547-10789551	301.641	47.651	2.66226	up	5e-05	0.00110206
gene21328	B0513.4	Uncharacterized protein	NC_003282.8:13880155-13881486	341.989	1850.41	-2.43583	down	5e-05	0.00110206
gene12985	cyp-13A12	CYtochrome P450 family	NC_003281.10:13024631-13027933	11.311	0.46345	4.60917	up	0.00565	0.0362498
gene11809	polk-1	DNA polymerase kappa	NC_003281.10:8626404-8628496	29.2975	82.732	-1.49767	down	0.0018	0.0171731
gene42269	M03F4.6	Uncharacterized protein	NC_003284.9:4964505-4969321	29.1802	4.41104	2.7258	up	0.0013	0.0137063
gene28438	Y105C5A.1270	Uncharacterized protein	NC_003282.8:15846016-15846651	6.06323	0	-	up	0.0068	0.0406502
gene20405	pqn-74	Prion-like-(Q/N-rich)-domain-bearing protein	NC_003282.8:13329782-13331373	142.565	12.3202	3.53253	up	5e-05	0.00110206
gene19688	cyp-31A2	CYtochrome P450 family	NC_003282.8:11403971-11405959	36.4998	133.649	-1.87249	down	0.0003	0.00471148
gene40007	Y69H2.3	Uncharacterized protein	NC_003283.11:18656190-18664096	47.5162	108.279	-1.18826	down	0.0081	0.0455278
gene18381	Y42H9B.3	Uncharacterized protein	NC_003282.8:8011292-8012427	45.7218	157.811	-1.78724	down	0.00075	0.00925093
gene7928	M02G9.2	Uncharacterized protein	NC_003280.10:10321491-10324693	20.3888	1.10618	4.20412	up	0.00175	0.0168417
gene43028	F41C6.7	Uncharacterized protein	NC_003284.9:6882492-6885277	17.0317	1.76835	3.26775	up	0.0049	0.0329045
gene1966	suro-1	Putative carboxypeptidase suro-1	NC_003279.8:7872264-7875516	94.4844	3.80124	4.63554	up	5e-05	0.00110206
gene2537	lin-53	Probable histone-binding protein lin-53	NC_003279.8:9618402-9619757	138.199	358.645	-1.37581	down	0.00175	0.0168417
gene3741	sepa-1	Sdownpressor of Ectopic P granules in Autophagy mutant	NC_003279.8:13298300-13300701	0.506742	21.9118	-5.43432	down	0.0015	0.0151584
gene9962	Y54F10AM.6	Uncharacterized protein	NC_003281.10:2509091-2511642	74.449	3.3572	4.47092	up	0.00065	0.0083666
gene7874	phg-1	Growth arrest-specific protein 1 homolog	NC_003280.10:10137667-10139052	109.842	21.2169	2.37214	up	0.00225	0.0200561
gene8035	M28.8	Uncharacterized protein	NC_003280.10:10628268-10633069	11.0014	54.4529	-2.30731	down	5e-05	0.00110206
gene41903	T19D2.1	Uncharacterized protein	NC_003284.9:3931769-3937605	11.7015	2.51682	2.21702	up	0.0025	0.0211243
gene13729	Y69A2AR.19	Uncharacterized protein	NC_003282.8:2488849-2494063	22.2936	6.59403	1.7574	up	0.00315	0.0245028
gene6414	C30B5.6	Uncharacterized protein	NC_003280.10:6219686-6222656	20.0556	2.0044	3.32277	up	0.0011	0.012147
gene36144	col-146	COLlagen	NC_003283.11:9629956-9630960	451.284	26.28	4.102	up	5e-05	0.00110206
gene18333	atic-1	5-Aminoimidazole-4-carboxamide ribonucleotide formylTransferase/IMP Cyclohydrolase homolog	NC_003282.8:7882066-7900115	51.5213	9.52053	2.43606	up	0.002	0.0184435
gene546	W10C8.5	Uncharacterized protein	NC_003279.8:2854050-2855670	121.508	23.6731	2.35973	up	0.0001	0.00197766
gene41648	F28B4.3	Uncharacterized protein	NC_003284.9:3227550-3235406	79.2707	20.628	1.94219	up	5e-05	0.00110206
gene44026	ZK899.6	Uncharacterized protein	NC_003284.9:9463355-9464390	0	3.57625	-	down	5e-05	0.00110206
gene6830	E04F6.15	Uncharacterized protein	NC_003280.10:7208863-7210269	26.5947	1.5455	4.10499	up	0.00505	0.0336796
gene4776	F36H5.13	Uncharacterized protein	NC_003280.10:1748381-1749400	0	2.89327	-	down	5e-05	0.00110206
gene12963	Y37D8A.19	Uncharacterized protein	NC_003281.10:12928473-12931861	863.447	5126.5	-2.56979	down	0.00145	0.014816
gene778	C50F2.2	Uncharacterized protein	NC_003279.8:3881832-3888215	7.99324	25.131	-1.65261	down	0.0011	0.012147
gene35102	lipl-6	LIPase Like	NC_003283.11:6931621-6934219	6.03933	0.820593	2.87965	up	0.0092	0.0488728
gene40927	mab-7	Protein male abnormal 7	NC_003284.9:892470-897944	92.9296	4.55163	4.35168	up	0.0006	0.00788238
gene38224	srm-4	Serpentine Receptor, class M	NC_003283.11:14333415-14334676	0	0.778424	-	down	0.00055	0.00740175
gene7445	cutl-15	CUTiclin-Like	NC_003280.10:8942887-8947584	37.0077	5.62608	2.71762	up	0.002	0.0184435
gene13817	Y54G2A.37	Uncharacterized protein	NC_003282.8:2820729-2823498	5.09866	0	-	up	5e-05	0.00110206
gene18676	spr-2	Sdownpressor of PResenilin defect	NC_003282.8:8891474-8892538	102.36	216.667	-1.08182	down	0.0092	0.0488728
gene40680	Y44A6D.5	Branched-chain-amino-acid aminotransferase	NC_003283.11:20801223-20802942	28.0082	7.94759	1.81726	up	0.00815	0.0456538
gene19980	F11A10.5	Protein ST7 homolog	NC_003282.8:12094376-12096420	52.8716	130.177	-1.29991	down	0.00315	0.0245028
gene33105	K09C6.10	Uncharacterized protein	NC_003283.11:839420-839934	1.67245	0	-	up	0.0068	0.0406502
gene39236	Y70C5A.3	Uncharacterized protein	NC_003283.11:16618373-16620901	7.16971	0.49129	3.86727	up	0.00525	0.0345677
gene10813	hach-1	3-hydroxyisobutyryl-CoA hydrolase, mitochondrial	NC_003281.10:5555453-5556990	611.133	142.498	2.10054	up	5e-05	0.00110206
gene46694	lec-9	Galectin	NC_003284.9:17600522-17601423	1736.3	147.292	3.55926	up	5e-05	0.00110206
gene36183	cal-7	CALmodulin related genes	NC_003283.11:9734102-9735316	1.64614	0	-	up	0.0003	0.00471148
gene10236	evl-18	Uncharacterized protein	NC_003281.10:3730100-3735039	30.5132	79.4076	-1.37984	down	0.00305	0.0239614
gene18989	ins-8	Non-coding transcript of protein-coding gene ins-8	NC_003282.8:9680386-9680941	0	12.472	-	down	0.0005	0.00687417
gene1251	F46F11.8	Uncharacterized protein	NC_003279.8:5624690-5626074	53.6483	156.83	-1.54759	down	0.00185	0.0174989
gene10821	F56D2.3	Uncharacterized protein	NC_003281.10:5584686-5586785	35.9755	2.48699	3.85454	up	0.00035	0.00529575
gene17634	C43G2.3	Uncharacterized protein	NC_003282.8:6578238-6579360	64.1996	16.9562	1.92075	up	0.0047	0.0320293
gene10599	F26A1.1	Uncharacterized protein	NC_003281.10:4850537-4851782	51.9372	174.582	-1.74907	down	0.00075	0.00925093
gene1923	T23G11.1	Uncharacterized protein	NC_003279.8:7701416-7701969	211.675	49.7059	2.09036	up	0.00115	0.0125072
gene38292	R02D5.3	Uncharacterized protein	NC_003283.11:14483159-14484217	29.9002	284.225	-3.24881	down	5e-05	0.00110206
gene5288	sri-40	Serpentine Receptor, class I	NC_003280.10:3178160-3180420	7.33593	54.2455	-2.88645	down	0.00165	0.0162477
gene13497	col-104	COLlagen	NC_003282.8:1353700-1355295	1193.83	41.7496	4.83769	up	5e-05	0.00110206
gene5963	C27D6.11	Uncharacterized protein	NC_003280.10:5159782-5161130	28.958	7.78047	1.89603	up	0.00725	0.0421973
gene34036	sre-9	Serpentine Receptor, class E (epsilon)	NC_003283.11:3894960-3898208	0	1.29368	-	down	5e-05	0.00110206
gene9355	H10E21.4	Uncharacterized protein	NC_003281.10:17420-19563	269.612	9.25847	4.86396	up	5e-05	0.00110206
gene44508	K09C8.2	Uncharacterized protein	NC_003284.9:10959576-10960845	0	0.906537	-	down	0.00155	0.0155028
gene41803	C02F12.8	Uncharacterized protein	NC_003284.9:3690329-3693233	3.97481	16.4821	-2.05194	down	0.00475	0.0321057
gene36475	Y32F6A.5	Uncharacterized protein	NC_003283.11:10446533-10453605	244.37	110.527	1.14467	up	0.0061	0.03806
gene19049	msp-81	Major Sperm Protein	NC_003282.8:9836033-9836417	1755.16	493.754	1.82974	up	0.0005	0.00687417
gene3047	ztf-6	Zinc finger putative Transcription Factor family	NC_003279.8:11206985-11211301	14.7055	43.9029	-1.57796	down	0.0048	0.0324039
gene8141	col-81	COLlagen	NC_003280.10:11012493-11013760	1276.74	310.463	2.03997	up	5e-05	0.00110206
gene39892	fbxb-119	F-box B protein	NC_003283.11:18318615-18319744	0	5.45724	-	down	5e-05	0.00110206
gene7749	ZK1321.4	Uncharacterized protein	NC_003280.10:9770959-9773942	140.992	28.148	2.32451	up	0.0001	0.00197766
gene19589	C08F8.3	Uncharacterized protein	NC_003282.8:11155061-11156454	40.4622	93.8867	-1.21435	down	0.0093	0.0491516
gene10834	C05D2.8	Uncharacterized protein	NC_003281.10:5607573-5610344	96.2381	13.8448	2.79727	up	5e-05	0.00110206
gene12952	mrg-1	human MRG (Mortality factor-Related Gene) related	NC_003281.10:12871517-12874654	103.482	307.047	-1.56908	down	0.00015	0.0027619
gene7803	C05C10.2	Uncharacterized protein	NC_003280.10:9922247-9930507	21.0524	54.1624	-1.3633	down	0.00135	0.0140456
gene11899	ZK637.6	-	NC_003281.10:8898621-8899530	15.0428	54.3577	-1.85341	down	0.0041	0.0293037
gene7585	F42A8.3	Uncharacterized protein	NC_003280.10:9352999-9354172	40.0208	102.955	-1.3632	down	0.00635	0.0391623
gene33296	K04F1.8	Uncharacterized protein	NC_003283.11:1667203-1667813	0	2.70223	-	down	0.003	0.0237149
gene19378	R09H10.2	Uncharacterized protein	NC_003282.8:10602943-10606834	7.77987	0.758769	3.35801	up	0.00855	0.0468481
gene6613	T19D12.2	Uncharacterized protein	NC_003280.10:6661995-6665005	34.0687	8.40783	2.01864	up	0.0028	0.0226976
gene40036	scl-19	SCP-Like extracellular protein	NC_003283.11:18732006-18732772	0	1.18213	-	down	0.0046	0.0315165
gene19962	K08E4.2	Uncharacterized protein	NC_003282.8:12055853-12056641	14.8235	55.823	-1.91297	down	0.0082	0.0458099
gene34878	F57F4.4	Uncharacterized protein	NC_003283.11:6401530-6408783	69.6851	6.08272	3.51806	up	5e-05	0.00110206
gene40685	T03D8.6	Uncharacterized protein	NC_003283.11:20816650-20820085	95.1046	14.5302	2.71046	up	5e-05	0.00110206
gene7969	sdz-37	SKN-1 Dependent Zygotic transcript	NC_003280.10:10464869-10465298	0	21.8583	-	down	5e-05	0.00110206
gene7929	M02G9.1	Uncharacterized protein	NC_003280.10:10326293-10335588	8.63953	0.801516	3.43015	up	0.0025	0.0211243
gene9220	ZC101.1	Uncharacterized protein	NC_003280.10:14675262-14684296	11.0767	1.80953	2.61384	up	0.0077	0.0439814
gene44661	hum-4	Heavy chain, Unconventional Myosin	NC_003284.9:11420742-11433524	29.4704	5.72664	2.36351	up	0.0002	0.00345935
gene42613	acp-5	ACid Phosphatase family	NC_003284.9:5829457-5831906	30.2178	4.79558	2.65562	up	0.002	0.0184435
gene33428	F22F7.11	Uncharacterized protein	NC_003283.11:2119828-2120215	7.55581	0	-	up	0.00235	0.0203769
gene10325	C03C10.5	Uncharacterized protein	NC_003281.10:4090290-4090557	0	441.753	-	down	0.0001	0.00197766
gene11661	C02F5.13	TM2 domain-containing protein C02F5.13	NC_003281.10:8247350-8248653	46.9461	163.616	-1.80124	down	0.00205	0.018779
gene11408	alh-12	ALdehyde deHydrogenase	NC_003281.10:7454088-7455903	102.536	32.3128	1.66596	up	0.0005	0.00687417
gene12599	Y47D3A.29	DNA polymerase	NC_003281.10:11142447-11153944	24.9135	60.4649	-1.27917	down	0.00235	0.0203769
gene18551	C28C12.12	Uncharacterized protein	NC_003282.8:8494797-8496359	63.5276	143.428	-1.17487	down	0.0084	0.046519
gene40159	Y39B6A.10	Uncharacterized protein	NC_003283.11:19131611-19133574	15.4367	65.717	-2.0899	down	0.00455	0.031421
gene36540	T21C9.6	Uncharacterized protein	NC_003283.11:10581891-10587034	22.4503	3.90983	2.52155	up	0.00055	0.00740175
gene32940	scl-27	SCP-Like extracellular protein	NC_003283.11:400256-401602	0	2.73687	-	down	5e-05	0.00110206
gene404	mcm-4	yeast MCM (licensing factor) related	NC_003279.8:2318426-2321810	43.8783	155.437	-1.82475	down	5e-05	0.00110206
gene19753	srgp-1	Slit-Robo GAP homolog	NC_003282.8:11570542-11578358	56.6084	123.168	-1.12154	down	0.0069	0.0409522
gene44821	mes-1	Protein mes-1	NC_003284.9:11857500-11861894	3.37048	14.0971	-2.06437	down	0.0055	0.0356048
gene15183	Y59E9AL.6	Uncharacterized protein	NC_003282.8:5224958-5225708	214.912	72.8926	1.5599	up	0.00715	0.0418212
gene5570	F54D10.7	Uncharacterized protein	NC_003280.10:3820221-3821281	6.29483	43.11	-2.77578	down	0.0017	0.0164851
gene9036	Y39G8B.9	Uncharacterized protein	NC_003280.10:13981375-13981750	942.401	57.3204	4.03922	up	0.0012	0.0129489
gene2958	vet-2	Very Early Transcript	NC_003279.8:10846799-10850008	1.13233	24.6095	-4.44185	down	0.0001	0.00197766
gene38371	unc-112	Protein unc-112	NC_003283.11:14692151-14696629	82.2277	34.4117	1.25673	up	0.0037	0.027342
gene19201	K08F4.3	Translocon-associated protein subunit beta	NC_003282.8:10129393-10130134	173.624	412.354	-1.24792	down	0.00895	0.0479293
gene44145	R07B1.6	Uncharacterized protein	NC_003284.9:9866666-9867921	14.7874	0	-	up	5e-05	0.00110206
gene5381	Y49F6C.8	Uncharacterized protein	NC_003280.10:3369281-3370092	27.2752	136.483	-2.32306	down	0.00475	0.0321057
gene9516	cyn-6	Peptidyl-prolyl cis-trans isomerase 6	NC_003281.10:773413-774065	430.696	89.0901	2.27333	up	0.0002	0.00345935
gene15264	msp-51	Major sperm protein 19/31/40/45/50/51/53/59/61/65/81/113/142	NC_003282.8:5294956-5295340	2195.29	516.145	2.08856	up	5e-05	0.00110206
gene12044	K04H4.2	Uncharacterized protein	NC_003281.10:9348185-9355345	69.0343	5.81606	3.5692	up	5e-05	0.00110206
gene875	met-1	Histone-lysine N-methyltransferase	NC_003279.8:4254475-4264326	11.9092	34.9357	-1.55262	down	0.00045	0.00637744
gene33738	asp-7	ASpartyl Protease	NC_003283.11:3028293-3029583	0.855513	0	-	up	5e-05	0.00110206
gene7214	K01C8.1	Uncharacterized protein	NC_003280.10:8265201-8267253	105.039	39.3117	1.41789	up	0.00365	0.0271788
gene40829	B0310.1	Uncharacterized protein	NC_003284.9:493355-497213	39.9056	5.22919	2.93193	up	0.0011	0.012147
gene42706	ptr-4	PaTched Related family	NC_003284.9:6060974-6065965	63.4574	4.72089	3.74866	up	5e-05	0.00110206
gene35629	asp-5	ASpartyl Protease	NC_003283.11:8272386-8273988	1187.82	413.158	1.52355	up	0.00275	0.0224019
gene8942	bub-3	Mitotic checkpoint protein bub-3	NC_003280.10:13726081-13729464	76.922	235.992	-1.61727	down	0.0006	0.00788238
gene5246	sri-31	Serpentine Receptor, class I	NC_003280.10:3051002-3052322	0	0.855118	-	down	0.00115	0.0125072
gene40812	ZK1193.4	Uncharacterized protein	NC_003284.9:422889-425625	23.4768	2.28736	3.35948	up	0.0017	0.0164851
gene42855	mdown-2	Troponin T	NC_003284.9:6408698-6410208	465.447	185.898	1.32411	up	0.0017	0.0164851
gene18219	clec-180	C-type lectin domain-containing protein 180	NC_003282.8:7568944-7573649	47.1849	1.78868	4.72136	up	0.00015	0.0027619
gene15274	msp-59	Major sperm protein 19/31/40/45/50/51/53/59/61/65/81/113/142	NC_003282.8:5312727-5313111	2035.26	542.353	1.90791	up	5e-05	0.00110206
gene14263	trpl-2	TRP-channel-Like	NC_003282.8:4326715-4331893	3.60859	14.7797	-2.03411	down	0.0056	0.0359988
gene89	Y65B4BL.4	Uncharacterized protein	NC_003279.8:503061-506212	28.2528	83.9529	-1.57118	down	0.00535	0.0349206
gene14105	dct-8	DAF-16/FOXO Controlled, germline Tumor affecting	NC_003282.8:3895190-3895445	0	553.64	-	down	0.0006	0.00788238
gene4897	fbxb-6	F-box B protein	NC_003280.10:2064461-2065870	0	1.59167	-	down	5e-05	0.00110206
gene13757	daao-1	D-amino-acid oxidase	NC_003282.8:2614201-2617033	33.38	4.01974	3.05381	up	0.00255	0.0213614
gene34070	cyp-34A9	CYtochrome P450 family	NC_003283.11:3968233-3970484	105.14	35.0499	1.58483	up	0.0007	0.00881148
gene45804	hch-1	Zinc metalloproteinase nas-34	NC_003284.9:14696518-14699965	0	21.5781	-	down	5e-05	0.00110206
gene38152	ZC376.2	Uncharacterized protein	NC_003283.11:14171702-14175299	17.7916	4.37871	2.02262	up	0.00675	0.0406502
gene2197	egg-6	Leucine-rich repeat-containing protein egg-6	NC_003279.8:8677074-8681237	48.0988	151.685	-1.65701	down	5e-05	0.00110206
gene12190	R10E11.5	Uncharacterized protein	NC_003281.10:9786068-9789641	21.8969	1.58455	3.78858	up	0.0009	0.010484
gene4397	T02H6.9	Uncharacterized protein	NC_003280.10:679024-679675	0	3.06566	-	down	5e-05	0.00110206
gene35032	clik-1	CaLponIn-liKe proteins	NC_003283.11:6765985-6768452	941.867	188.122	2.32386	up	5e-05	0.00110206
gene841	R12E2.14	Uncharacterized protein	NC_003279.8:4149999-4150562	9208.04	441.22	4.38332	up	0.0016	0.0158972
gene19163	T04B2.8	Uncharacterized protein	NC_003282.8:10050580-10051115	16.8	0	-	up	5e-05	0.00110206
gene45215	K03A11.1	Uncharacterized protein	NC_003284.9:13051795-13055126	0.446238	8.00585	-4.16517	down	0.00225	0.0200561
gene38003	swan-1	Seven WD repeats, AN11 family	NC_003283.11:13804757-13807211	14.8628	50.7377	-1.77135	down	0.00475	0.0321057
gene6646	F41G3.6	Uncharacterized protein	NC_003280.10:6742919-6744093	77.0606	194.986	-1.33931	down	0.0051	0.0339174
gene12705	gly-8	Probable N-acetylgalactosaminyltransferase 8	NC_003281.10:11625242-11628201	194.837	35.5923	2.45263	up	5e-05	0.00110206
gene46258	mrp-3	Uncharacterized protein	NC_003284.9:15930008-15939322	21.1796	2.89319	2.87194	up	0.0002	0.00345935
gene21973	noah-2	NOmpA Homolog (Drosophila nompA: no mechanoreceptor potential A)	NC_003282.8:14091268-14096301	108.701	45.6029	1.25317	up	0.00325	0.0251037
gene42809	col-166	COLlagen	NC_003284.9:6280015-6280921	930.281	54.7919	4.08563	up	5e-05	0.00110206
gene6102	fzy-1	WD repeat-containing protein fzy-1	NC_003280.10:5501651-5503632	60.6691	158.415	-1.38467	down	0.00245	0.0209694
gene13582	K08D12.4	Uncharacterized protein	NC_003282.8:1707296-1708534	87.1273	8.14965	3.41832	up	0.00855	0.0468481
gene14622	T08B6.4	Uncharacterized protein	NC_003282.8:4906063-4908458	46.8734	17.7999	1.3969	up	0.00785	0.0445004
gene5979	msp-50	Major sperm protein 19/31/40/45/50/51/53/59/61/65/81/113/142	NC_003280.10:5199796-5200180	384.99	108.319	1.82953	up	0.0064	0.039368
gene13341	cutl-28	CUTiclin-Like	NC_003282.8:684504-688143	7.57525	1.52129	2.316	up	0.00525	0.0345677
gene36654	C29A12.1	Uncharacterized protein	NC_003283.11:10812443-10813389	92.1996	216.971	-1.23467	down	0.0095	0.0499059
gene19959	T12G3.4	Uncharacterized protein	NC_003282.8:12048267-12049859	39.5108	139.287	-1.81774	down	0.0004	0.00586466
gene18821	flh-3	FLYWCH zinc finger transcription factor homolog	NC_003282.8:9270096-9271618	5.90608	52.297	-3.14646	down	5e-05	0.00110206
gene45305	R04D3.4	Uncharacterized protein	NC_003284.9:13287905-13288805	5.72478	63.2422	-3.4656	down	0.0006	0.00788238
gene32781	C49C3.9	Uncharacterized protein	NC_003282.8:17339706-17342233	13.2716	302.717	-4.51155	down	5e-05	0.00110206
gene45018	nspc-14	Nematode Specific Peptide family, grodown C	NC_003284.9:12358664-12359043	4108.23	817.079	2.32997	up	0.00015	0.0027619
gene20899	ent-4	Equilibrative Nucleoside Transporter	NC_003282.8:13726968-13732591	37.2851	3.06899	3.60276	up	0.00035	0.00529575
gene10546	F17C8.7	Uncharacterized protein	NC_003281.10:4736069-4737205	78.4728	25.1184	1.64345	up	0.006	0.0376633
gene45022	F19H6.4	Uncharacterized protein	NC_003284.9:12365687-12367115	6.33168	90.0499	-3.83006	down	0.0001	0.00197766
gene44144	R07B1.5	Uncharacterized protein	NC_003284.9:9865086-9866365	2.44909	0	-	up	0.0008	0.00954063
gene4748	fbxb-18	F-box B protein	NC_003280.10:1686833-1687790	0	5.62747	-	down	5e-05	0.00110206
gene37284	F57F5.1	Uncharacterized protein	NC_003283.11:12003173-12004381	2331.16	470.374	2.30917	up	0.00015	0.0027619
gene20094	thn-2	THaumatiN family	NC_003282.8:12383171-12383920	469.123	64.6843	2.85848	up	5e-05	0.00110206
gene29988	H25K10.1	Purple acid phosphatase	NC_003282.8:16202404-16205264	2.29418	0	-	up	5e-05	0.00110206
gene19412	R102.11	Uncharacterized protein	NC_003282.8:10698460-10699566	109.339	8.87618	3.62273	up	0.0077	0.0439814
gene4730	fbxb-21	F-box B protein	NC_003280.10:1647907-1648865	0	1.07867	-	down	0.00015	0.0027619
gene4927	C40A11.2	Uncharacterized protein	NC_003280.10:2146962-2148664	0	14.0187	-	down	5e-05	0.00110206
gene14421	R11E3.19	Uncharacterized protein	NC_003282.8:4775241-4776096	5.66096	0	-	up	5e-05	0.00110206
gene14316	gbb-2	GABA B receptor subunit	NC_003282.8:4489011-4506609	14.5002	3.56676	2.02338	up	0.00535	0.0349206
gene42163	spat-3	Sdownpressor of PAr-Two defect	NC_003284.9:4596198-4605896	3.4268	17.2073	-2.32808	down	5e-05	0.00110206
gene39370	clec-239	C-type LECtin	NC_003283.11:16956528-16957991	5.71674	0	-	up	5e-05	0.00110206
gene4247	ubxn-3	UBX-containing protein in Nematodes	NC_003280.10:217317-220621	72.287	169.771	-1.23178	down	0.00365	0.0271788
gene35483	F40A3.6	Uncharacterized protein	NC_003283.11:7891566-7895253	117.47	15.6742	2.90583	up	0.0017	0.0164851
gene5812	msp-3	Major sperm protein 3	NC_003280.10:4785897-4786281	270.855	71.3199	1.92514	up	0.0069	0.0409522
gene18858	C10C5.2	Uncharacterized protein	NC_003282.8:9371508-9373136	13.0231	41.9009	-1.68591	down	0.0095	0.0499059
gene34532	dnj-19	DNaJ domain (prokaryotic heat shock protein)	NC_003283.11:5503237-5504845	192.566	452.912	-1.23388	down	0.003	0.0237149
gene17586	ddi-1	Dna (DNA) Damage Inducible homolog	NC_003282.8:6522873-6524345	69.5592	208.048	-1.5806	down	0.0005	0.00687417
gene32315	Y116A8C.19	Uncharacterized protein	NC_003282.8:17039054-17039645	0	14.0614	-	down	5e-05	0.00110206
gene35983	col-10	Cuticle collagen 10	NC_003283.11:9164355-9165290	651.475	29.4788	4.46596	up	5e-05	0.00110206
gene37844	nhr-168	Nuclear Hormone Receptor family	NC_003283.11:13331229-13333386	17.3232	1.64427	3.39718	up	0.00275	0.0224019
gene45099	nhr-17	Nuclear Hormone Receptor family	NC_003284.9:12664241-12667852	16.8954	103.446	-2.61418	down	5e-05	0.00110206
gene43651	tth-1	Tetra THymosin (four thymosin repeat protein)	NC_003284.9:8422865-8423709	323.351	1688.75	-2.38478	down	5e-05	0.00110206
gene1168	dhs-2	DeHydrogenases, Short chain	NC_003279.8:5354180-5356932	48.4593	5.269	3.20117	up	0.0007	0.00881148
gene40269	C25F9.16	Uncharacterized protein	NC_003283.11:19434388-19434684	0	45.727	-	down	0.0014	0.0144568
gene709	inx-22	Innexin	NC_003279.8:3608615-3611703	31.6254	131.93	-2.06062	down	0.0002	0.00345935
gene39027	F10A3.4	Uncharacterized protein	NC_003283.11:16149241-16151810	12.6225	0.786651	4.00413	up	0.00535	0.0349206
gene11915	ZK643.5	Uncharacterized protein	NC_003281.10:8952958-8956184	46.0985	129.657	-1.49191	down	0.0008	0.00954063
gene36625	irld-6	Insulin/EGF-Receptor L Domain protein	NC_003283.11:10754495-10756628	15.7801	2.78976	2.49989	up	0.006	0.0376633
gene37995	F53C11.1	Uncharacterized protein	NC_003283.11:13775803-13777734	12.591	97.3742	-2.95115	down	5e-05	0.00110206
gene4657	Y51H7C.3	Uncharacterized protein	NC_003280.10:1438509-1439603	56.3331	234.994	-2.06057	down	0.0053	0.0348
gene18626	F21D5.6	Uncharacterized protein	NC_003282.8:8740287-8741381	61.8597	178.999	-1.53288	down	0.00245	0.0209694
gene5851	gst-6	Probable glutathione S-transferase 6	NC_003280.10:4879915-4880985	103.376	15.0791	2.77728	up	0.001	0.0113532
gene6810	C27H5.4	Uncharacterized protein	NC_003280.10:7162530-7165837	31.1097	3.76721	3.0458	up	0.0013	0.0137063
gene8741	cnp-2	Calcineurin-interacting protein 2	NC_003280.10:12760820-12767148	51.6433	5.95748	3.11581	up	5e-05	0.00110206
gene43609	drd-5	dietary restriction up regulated	NC_003284.9:8344875-8346342	55.3687	1.2361	5.48521	up	0.00325	0.0251037
gene6928	wrt-10	WaRThog (hedgehog-like family)	NC_003280.10:7533495-7534446	154.981	50.0247	1.63137	up	0.00245	0.0209694
gene18755	C01F6.14	Uncharacterized protein	NC_003282.8:9103896-9104121	0	25.0604	-	down	0.0087	0.0470932
gene37865	F53F1.4	Uncharacterized protein	NC_003283.11:13411109-13411537	9555.58	481.482	4.31079	up	5e-05	0.00110206
gene41100	ZK380.5	Uncharacterized protein	NC_003284.9:1647990-1649237	0	3.13051	-	down	0.00135	0.0140456
gene43340	F26A10.2	Uncharacterized protein	NC_003284.9:7632090-7637085	20.7614	3.1538	2.71874	up	0.00035	0.00529575
gene14434	dpf-7	Dipeptidyl Peptidase Four (IV) family	NC_003282.8:4799598-4802548	21.6621	52.1043	-1.26623	down	0.0092	0.0488728
gene4365	W08F4.10	Uncharacterized protein	NC_003280.10:590577-591210	1.43664	0	-	up	0.00235	0.0203769
gene45738	nspc-18	Nematode Specific Peptide family, grodown C	NC_003284.9:14527211-14527569	1952.31	270.332	2.85238	up	5e-05	0.00110206
gene8107	tba-4	Tubulin alpha chain	NC_003280.10:10918717-10920162	257.241	46.6789	2.46228	up	5e-05	0.00110206
gene17776	C17H12.8	Uncharacterized protein	NC_003282.8:6818724-6820547	505.354	110.503	2.1932	up	5e-05	0.00110206
gene32775	C49C3.6	Uncharacterized protein	NC_003282.8:17331530-17332240	50.9434	138.416	-1.44205	down	0.00665	0.0404251
gene38704	pqn-71	Prion-like-(Q/N-rich)-domain-bearing protein	NC_003283.11:15465700-15467038	8.30725	1.10241	2.91372	up	0.0086	0.0469976
gene2531	aqp-9	AQuaPorin or aquaglyceroporin related	NC_003279.8:9606261-9608937	42.2502	9.14684	2.20761	up	0.00595	0.037463
gene4898	F07E5.12	Uncharacterized protein	NC_003280.10:2068356-2068971	0	5.93025	-	down	5e-05	0.00110206
gene43786	EGAP4.1	Uncharacterized protein	NC_003284.9:8726996-8727386	30.3303	0	-	up	5e-05	0.00110206
gene33886	T20D4.10	Uncharacterized protein	NC_003283.11:3400254-3400961	114.165	15.0202	2.92615	up	0.00165	0.0162477
gene41606	gpd-2	Glyceraldehyde-3-phosphate dehydrogenase 2	NC_003284.9:3113566-3114687	596.105	179.136	1.73451	up	0.0001	0.00197766
gene46155	K09E9.3	Uncharacterized protein	NC_003284.9:15611844-15613760	3.4513	16.3513	-2.2442	down	0.00765	0.0438016
gene527	itx-1	InTestinal NeureXin-like	NC_003279.8:2802821-2815643	18.9657	50.3418	-1.40837	down	0.0007	0.00881148
gene36420	B0024.13	Polyprenol reductase	NC_003283.11:10320717-10322215	56.188	139.979	-1.31688	down	0.00785	0.0445004
gene1784	mlt-2	Uncharacterized protein	NC_003279.8:7204590-7207587	7.62706	1.48153	2.36404	up	0.0046	0.0315165
gene6717	C44B7.12	Adenosine deaminase-like protein	NC_003280.10:6892147-6893635	74.8395	192.909	-1.36605	down	0.0022	0.0197487
gene36343	C51E3.9	Uncharacterized protein	NC_003283.11:10146017-10148884	136.53	22.092	2.62763	up	0.00155	0.0155028
gene44114	T09B9.4	Uncharacterized protein	NC_003284.9:9772157-9774337	9.69031	28.8881	-1.57586	down	0.0089	0.0477387
gene4534	K02E7.4	Uncharacterized protein	NC_003280.10:1072405-1074012	4.34603	0	-	up	0.0068	0.0406502
gene13489	plst-1	PLaSTin (actin bundling protein) homolog	NC_003282.8:1289689-1295726	112.606	262.532	-1.2212	down	0.00315	0.0245028
gene44814	F54F7.2	Uncharacterized protein	NC_003284.9:11843665-11845110	3.81536	42.3472	-3.47238	down	0.0007	0.00881148
gene2223	DY3.8	Uncharacterized protein	NC_003279.8:8758317-8758995	85.908	314.247	-1.87104	down	0.0007	0.00881148
gene12983	col-98	COLlagen	NC_003281.10:13019019-13020117	641.798	176.683	1.86096	up	5e-05	0.00110206
gene5538	F12E12.1	Uncharacterized protein	NC_003280.10:3741906-3742382	15.8605	163.214	-3.36325	down	0.00475	0.0321057
gene7352	C34C6.10	Uncharacterized protein	NC_003280.10:8694807-8695180	135.774	0	-	up	0.00235	0.0203769
gene40332	Y43F8C.5	Uncharacterized protein	NC_003283.11:19631423-19632632	61.3481	16.0838	1.93141	up	0.0057	0.0364998
gene11082	C16A3.2	Uncharacterized protein	NC_003281.10:6389832-6390649	28.9836	88.7843	-1.61507	down	0.00665	0.0404251
gene42574	F46G11.2	Uncharacterized protein	NC_003284.9:5788162-5790252	18.1606	2.10657	3.10784	up	0.0035	0.0265151
gene38043	lbp-8	Lipid Binding Protein	NC_003283.11:13890785-13891263	18.5728	0	-	up	5e-05	0.00110206
gene18837	F49C12.9	Uncharacterized protein	NC_003282.8:9314969-9316107	56.2722	164.63	-1.54873	down	0.0018	0.0171731
gene37492	pals-39	Protein containing ALS2cr12 (ALS2CR12) domain	NC_003283.11:12441805-12443762	18.8237	53.8854	-1.51734	down	0.00525	0.0345677
gene18365	ora-1	Onchocerca Related Antigen family	NC_003282.8:7977902-7978890	300.517	7.8633	5.25617	up	0.00015	0.0027619
gene38551	T09F5.12	Unclassified non-coding RNA T09F5.12	NC_003283.11:15164742-15166318	24.0001	91.8746	-1.93663	down	0.0001	0.00197766
gene7817	R53.5	Uncharacterized protein	NC_003280.10:9969692-9970485	346.375	154.927	1.16075	up	0.00925	0.0490283
gene37416	twk-13	TWiK family of potassium channels	NC_003283.11:12320559-12337742	9.46916	1.89004	2.32482	up	0.00635	0.0391623
gene43583	F13B9.2	Uncharacterized protein	NC_003284.9:8285724-8286778	37.141	1.64989	4.49257	up	0.00485	0.032635
gene14155	pcn-1	Proliferating cell nuclear antigen	NC_003282.8:4048122-4049435	216.866	865.495	-1.99672	down	5e-05	0.00110206
gene7365	trcs-2	TRansport of membrane to Cell Surface	NC_003280.10:8722495-8725030	32.0977	77.0297	-1.26295	down	0.00375	0.0274906
gene3945	fbxb-93	F-box B protein	NC_003279.8:14083047-14084198	0	3.28642	-	down	5e-05	0.00110206
gene7308	col-38	COLlagen	NC_003280.10:8568077-8569069	2418.06	49.7883	5.6019	up	5e-05	0.00110206
gene4752	fbxc-26	F-box C protein	NC_003280.10:1693295-1694615	0	2.65298	-	down	5e-05	0.00110206
gene43273	mek-1	Non-coding transcript of protein-coding gene mek-1	NC_003284.9:7479255-7480579	51.0004	168.235	-1.7219	down	0.00045	0.00637744
gene6180	C25H3.18	-	NC_003280.10:5689430-5690000	0	415.029	-	down	0.001	0.0113532
gene35720	slc-17.8	SLC (SoLute Carrier) homolog	NC_003283.11:8539969-8545574	10.6672	0.572957	4.21862	up	0.00945	0.0498013
gene11292	ZK418.2	Uncharacterized protein	NC_003281.10:7091341-7093330	32.3933	6.90671	2.22962	up	0.0047	0.0320293
gene15549	Y4C6A.3	Uncharacterized protein	NC_003282.8:5451145-5452393	14.9923	129.42	-3.10976	down	5e-05	0.00110206
gene4791	math-4	MATH (meprin-associated Traf homology) domain containing	NC_003280.10:1778900-1782307	12.8067	1.70508	2.90899	up	0.0013	0.0137063
gene41262	F53B1.4	Uncharacterized protein	NC_003284.9:2111777-2113084	159.107	5.5771	4.83434	up	5e-05	0.00110206
gene46605	T25G12.6	Uncharacterized protein	NC_003284.9:17225234-17230049	8.80584	1.2419	2.82591	up	0.00115	0.0125072
gene36192	F58E6.13	Uncharacterized protein	NC_003283.11:9745240-9749099	407.574	6.83249	5.89851	up	5e-05	0.00110206
gene38170	K02E11.10	Uncharacterized protein	NC_003283.11:14240068-14241151	350.211	5.16246	6.08402	up	5e-05	0.00110206
gene69	rnp-8	RNP (RRM RNA binding domain) containing	NC_003279.8:364518-367940	31.6209	110.289	-1.80234	down	0.00045	0.00637744
gene18553	mesp-1	MEiotic SPindle	NC_003282.8:8499342-8499971	153.809	653.342	-2.0867	down	5e-05	0.00110206
gene46207	wrt-4	Warthog protein 4 N-product	NC_003284.9:15752467-15757264	64.3197	2.58815	4.63527	up	0.0001	0.00197766
gene36323	ugt-47	Putative UDP-glucuronosyltransferase ugt-47	NC_003283.11:10096331-10098577	106.086	10.1555	3.3849	up	5e-05	0.00110206
gene44249	F09B9.4	Uncharacterized protein	NC_003284.9:10160638-10161601	276.91	94.8096	1.54631	up	0.0027	0.0221472
gene12505	dpy-28	Condensin complex subunit 1	NC_003281.10:10763146-10776927	18.2744	46.7229	-1.3543	down	0.0021	0.0190682
gene8016	C06A1.12	Unclassified non-coding RNA C06A1.12	NC_003280.10:10574650-10574840	0	540.65	-	down	0.0071	0.041617
gene37470	K01D12.9	Uncharacterized protein	NC_003283.11:12404146-12404630	984.269	52.9458	4.21646	up	0.0008	0.00954063
gene11167	bath-41	BTB and MATH domain-containing protein 41	NC_003281.10:6720648-6722257	86.5112	212.629	-1.29738	down	0.0025	0.0211243
gene6143	lys-8	LYSozyme	NC_003280.10:5586178-5587543	732.625	256.151	1.51608	up	0.00075	0.00925093
gene44025	ZK899.5	Uncharacterized protein	NC_003284.9:9459910-9460933	0	7.31007	-	down	5e-05	0.00110206
gene11935	zif-1	Zinc finger-interacting factor 1	NC_003281.10:9002788-9004535	36.9394	126.686	-1.77803	down	0.00065	0.0083666
gene14062	siah-1	E3 ubiquitin-protein ligase siah-1	NC_003282.8:3744136-3747213	33.4228	99.5385	-1.57442	down	0.0017	0.0164851
gene34177	F47D2.11	Uncharacterized protein	NC_003283.11:4294155-4296020	1.04655	0	-	up	0.00025	0.00406508
gene37877	col-162	COLlagen	NC_003283.11:13441966-13443371	934.383	21.9282	5.41315	up	5e-05	0.00110206
gene34836	fbxa-202	F-box A protein	NC_003283.11:6327245-6328827	18.7471	4.63429	2.01625	up	0.00845	0.0466398
gene6865	haf-2	HAlF transporter (PGP related)	NC_003280.10:7353810-7356426	42.9975	106.135	-1.30358	down	0.0024	0.0206697
gene7711	ZK1307.1	Uncharacterized protein	NC_003280.10:9654430-9655531	132.063	53.3059	1.30886	up	0.00865	0.0470843
gene838	poml-3	PON (paraoxonase) and MEC-6 Like	NC_003279.8:4145350-4147095	91.6634	10.6494	3.10558	up	0.00035	0.00529575
gene10877	B0244.15	Uncharacterized protein	NC_003281.10:5742555-5744820	0	1.40696	-	down	5e-05	0.00110206
gene10792	R02F2.4	Uncharacterized protein	NC_003281.10:5484292-5485887	22.9372	86.7541	-1.91925	down	0.0006	0.00788238
gene9952	klo-2	KLOtho (mammalian aging-associated protein) homolog	NC_003281.10:2446222-2448535	24.849	4.09959	2.59964	up	0.00175	0.0168417
gene12309	T16G12.8	Uncharacterized protein	NC_003281.10:10059301-10061854	3.34974	51.0265	-3.92913	down	0.0005	0.00687417
gene44208	col-176	COLlagen	NC_003284.9:10077626-10078570	372.096	9.0779	5.35717	up	0.0001	0.00197766
gene35955	F21C10.9	Uncharacterized protein	NC_003283.11:9097293-9098659	86.0157	10.0801	3.0931	up	0.00105	0.0117915
gene10554	col-89	COLlagen	NC_003281.10:4748190-4749132	44.207	4.15437	3.41157	up	0.0011	0.012147
gene13073	bli-5	BLIstered cuticle	NC_003281.10:13427722-13429713	37.6769	2.38076	3.98419	up	0.0046	0.0315165
gene8890	E01G4.5	Uncharacterized protein	NC_003280.10:13472535-13473923	7.13968	44.8142	-2.65002	down	0.0011	0.012147
gene42465	T23F2.2	Uncharacterized protein	NC_003284.9:5496832-5505188	5.8119	1.73321	1.74557	up	0.0063	0.0389701
gene40219	C43D7.11	-	NC_003283.11:19311862-19312819	0	2.776	-	down	5e-05	0.00110206
gene18292	swd-2.1	Set1 WD40 repeat protein homolog	NC_003282.8:7776024-7777872	33.9933	115.929	-1.76992	down	0.00125	0.0133406
gene15961	bec-1	Beclin homolog	NC_003282.8:5661339-5664417	35.7624	88.0879	-1.3005	down	0.00725	0.0421973
gene43644	spp-13	SaPosin-like Protein family	NC_003284.9:8417578-8418389	237.582	9.7628	4.60499	up	0.0043	0.0302499
gene9104	jmjd-2	Lysine-specific demethylase 4	NC_003280.10:14235293-14243590	7.56862	21.4942	-1.50585	down	0.0038	0.0277956
gene18675	oma-1	Uncharacterized protein	NC_003282.8:8889085-8890532	96.9668	277.022	-1.51444	down	0.0006	0.00788238
gene39396	F49H6.3	Uncharacterized protein	NC_003283.11:17014407-17015326	0	105.799	-	down	5e-05	0.00110206
gene17959	klp-18	Kinesin-like protein	NC_003282.8:7040211-7043297	21.5806	68.0665	-1.65721	down	0.0002	0.00345935
gene18514	aagr-1	Acid Alpha Glucosidase Relate	NC_003282.8:8366753-8375347	149.702	19.5624	2.93594	up	5e-05	0.00110206
gene44379	bet-2	BET (two bromodomains) family protein	NC_003284.9:10569272-10575219	9.4261	33.8473	-1.84431	down	0.00025	0.00406508
gene37836	C50B6.3	Uncharacterized protein	NC_003283.11:13313597-13315487	41.068	118.338	-1.52682	down	0.0009	0.010484
gene32255	dct-13	DAF-16/FOXO Controlled, germline Tumor affecting	NC_003282.8:17024499-17025117	0	8.64477	-	down	5e-05	0.00110206
gene1881	T25G3.1	Uncharacterized protein	NC_003279.8:7553858-7554480	66.4131	205.036	-1.62634	down	0.00645	0.0395579
gene3606	attf-6	AT hook Transcription Factor family	NC_003279.8:12788209-12806546	6.64372	16.8854	-1.34572	down	0.0069	0.0409522
gene34862	bcl-11	mammalian BCL (B cell lymphoma) gene homologs	NC_003283.11:6356716-6361736	44.7692	11.8967	1.91195	up	0.001	0.0113532
gene9402	F40G9.12	Uncharacterized protein	NC_003281.10:172003-172734	0	2.73027	-	down	5e-05	0.00110206
gene5397	nep-8	NEPrilysin metallopeptidase family	NC_003280.10:3403918-3406788	14.6613	2.63029	2.47872	up	0.00775	0.0441451
gene15568	puf-7	Pumilio domain-containing protein 7	NC_003282.8:5486747-5489972	21.6648	151.563	-2.80649	down	5e-05	0.00110206
gene44153	mrp-4	Uncharacterized protein	NC_003284.9:9884322-9889415	13.4632	84.131	-2.64362	down	5e-05	0.00110206
gene5119	T05A8.6	Uncharacterized protein	NC_003280.10:2738588-2739642	1.21751	0	-	up	0.0008	0.00954063
gene36051	E02C12.6	Uncharacterized protein	NC_003283.11:9369548-9371086	14.928	0	-	up	5e-05	0.00110206
gene42348	pqn-62	Prion-like-(Q/N-rich)-domain-bearing protein	NC_003284.9:5196109-5203792	7.02182	1.22862	2.51481	up	0.0023	0.0202726
gene5133	sdz-10	SKN-1 Dependent Zygotic transcript	NC_003280.10:2771173-2772240	0	5.00138	-	down	5e-05	0.00110206
gene19254	ech-8	Enoyl-CoA Hydratase	NC_003282.8:10236698-10239114	44.5652	11.9875	1.89439	up	0.00385	0.0280498
gene16742	pqn-22	Prion-like-(Q/N-rich)-domain-bearing protein	NC_003282.8:6019977-6033639	164.374	26.8533	2.61382	up	5e-05	0.00110206
gene19692	gfat-2	Glutamine-Fructose 6-phosphate AminoTransferase homolog	NC_003282.8:11410512-11412845	98.1347	392.952	-2.00152	down	0.0001	0.00197766
gene12394	tbx-8	T-box transcription factor tbx-8	NC_003281.10:10347583-10349601	0	3.19277	-	down	5e-05	0.00110206
gene37160	T04F3.1	Uncharacterized protein	NC_003283.11:11740229-11754025	32.7843	8.39126	1.96604	up	0.0001	0.00197766
gene14963	AC7.3	Uncharacterized protein	NC_003282.8:5111838-5112875	26.0637	3.28591	2.98768	up	0.0049	0.0329045
gene33011	K06H6.6	-	NC_003283.11:583800-585308	1.63731	0	-	up	5e-05	0.00110206
gene8786	dct-18	DAF-16/FOXO Controlled, germline Tumor affecting	NC_003280.10:12931873-12933429	733.065	128.768	2.50916	up	5e-05	0.00110206
gene1766	crml-1	CARMIL (Capping, ARp2/3, Myosin I Linker protein) homolog	NC_003279.8:7152910-7156720	59.3739	135.239	-1.18761	down	0.00295	0.0234992
gene33016	ZK488.5	Uncharacterized protein	NC_003283.11:593273-595677	8.50267	0	-	up	5e-05	0.00110206
gene4912	math-35	-	NC_003280.10:2104523-2106866	18.8092	3.44027	2.45085	up	0.0026	0.0216488
gene5835	C33F10.11	Uncharacterized protein	NC_003280.10:4834188-4834782	161.499	42.5191	1.92534	up	0.00305	0.0239614
gene19386	R09H10.5	Uncharacterized protein	NC_003282.8:10621844-10628814	109.607	9.85757	3.47496	up	5e-05	0.00110206
gene5494	fbxb-31	F-box B protein	NC_003280.10:3637894-3639261	0	3.10214	-	down	5e-05	0.00110206
gene34310	R02F11.4	Uncharacterized protein	NC_003283.11:4811102-4818662	24.2737	66.2858	-1.44931	down	0.00315	0.0245028
gene7396	F46C5.9	Uncharacterized protein	NC_003280.10:8808791-8810721	75.8973	173.036	-1.18895	down	0.0053	0.0348
gene38379	fbxa-147	F-box A protein	NC_003283.11:14716563-14717425	4.03469	0	-	up	5e-05	0.00110206
gene12380	T07A5.1	Uncharacterized protein	NC_003281.10:10303409-10306129	14.9947	3.22345	2.21778	up	0.00575	0.0366781
gene5057	F33H12.7	Uncharacterized protein	NC_003280.10:2586160-2586864	4.24335	614.059	-7.17703	down	0.00585	0.037059
gene8661	T21B4.3	Uncharacterized protein	NC_003280.10:12495576-12496387	4.5242	0	-	up	0.00025	0.00406508
gene33833	T28A11.4	Uncharacterized protein	NC_003283.11:3274053-3274374	74.3134	0	-	up	5e-05	0.00110206
gene2743	clec-87	C-type lectin domain-containing protein 87	NC_003279.8:10184645-10185446	519.456	2860.62	-2.46126	down	5e-05	0.00110206
gene2377	F36H2.5	Uncharacterized protein	NC_003279.8:9252073-9254359	8.37989	1.38042	2.60182	up	0.0079	0.0446767
gene35641	W02D7.11	Uncharacterized protein	NC_003283.11:8302886-8304469	74.1486	0	-	up	0.00025	0.00406508
gene44200	ZC374.2	Uncharacterized protein	NC_003284.9:10034835-10047313	9.59546	1.81482	2.40252	up	0.00415	0.0294575
gene2064	col-63	COLlagen	NC_003279.8:8243753-8244948	1014.68	18.7321	5.75936	up	5e-05	0.00110206
gene45798	csq-1	Calsequestrin	NC_003284.9:14684877-14688168	403.827	168.155	1.26395	up	0.00275	0.0224019
gene5783	scc-1	Sister chromatid cohesion protein 1	NC_003280.10:4698720-4700797	18.0619	48.5652	-1.42697	down	0.00415	0.0294575
gene25697	col-135	COLlagen	NC_003282.8:15129758-15131786	1.1955	140.221	-6.87394	down	5e-05	0.00110206
gene39298	gyg-2	GlYcoGenin like	NC_003283.11:16745237-16746249	169.178	659.357	-1.96252	down	5e-05	0.00110206
gene33272	F16B4.2	Uncharacterized protein	NC_003283.11:1601041-1603916	7.05111	36.913	-2.38821	down	0.0017	0.0164851
gene41597	wrt-2	WaRThog (hedgehog-like family)	NC_003284.9:3092513-3094296	36.9106	2.07455	4.15316	up	5e-05	0.00110206
gene5836	C33F10.1	Uncharacterized protein	NC_003280.10:4835079-4835673	516.686	173.69	1.57277	up	0.003	0.0237149
gene8040	M28.10	Uncharacterized protein	NC_003280.10:10647515-10648523	324.413	149.799	1.1148	up	0.0093	0.0491516
gene36129	K09G1.2	Uncharacterized protein	NC_003283.11:9590677-9591205	89.3783	19.087	2.22733	up	0.00765	0.0438016
gene41513	F53B3.5	Uncharacterized protein	NC_003284.9:2873376-2879619	25.0216	81.1371	-1.69719	down	0.007	0.0412793
gene296	ubc-3	UBiquitin Conjugating enzyme	NC_003279.8:1698350-1700787	146.528	352.57	-1.26673	down	0.0022	0.0197487
gene35255	clec-7	C-type LECtin	NC_003283.11:7328414-7329817	33.0292	0.700243	5.55974	up	0.0061	0.03806
gene40625	F46B3.19	-	NC_003283.11:20614381-20615054	4.90245	0	-	up	5e-05	0.00110206
gene39973	Y51A2D.23	-	NC_003283.11:18529391-18529878	0	4.08517	-	down	0.00045	0.00637744
gene11673	clec-160	C-type lectin domain-containing protein 160	NC_003281.10:8273007-8275971	46.5463	3.71898	3.64569	up	0.0001	0.00197766
gene9971	Y54F10AM.11	Uncharacterized protein	NC_003281.10:2561709-2566556	11.9359	56.8071	-2.25076	down	0.00245	0.0209694
gene108	lpr-1	LiPocalin-Related protein	NC_003279.8:557505-561563	25.1233	2.19069	3.51957	up	0.0057	0.0364998
gene1239	M01E11.1	Protein-S-isoprenylcysteine O-methyltransferase	NC_003279.8:5582101-5583263	35.3799	98.1733	-1.4724	down	0.00875	0.0471787
gene35517	abhd-12	ABHydrolase Domain containing homolog	NC_003283.11:7984142-7985907	136.908	319.29	-1.22166	down	0.00445	0.030911
gene37800	col-160	COLlagen	NC_003283.11:13201097-13202099	1273.53	467.275	1.44649	up	0.0053	0.0348
gene38642	wrt-8	Warthog protein 8 N-product	NC_003283.11:15342148-15344501	28.6733	0.896935	4.99856	up	0.00285	0.022901
gene35379	folt-3	Folate-like transporter 3	NC_003283.11:7603805-7609738	1.03168	0	-	up	0.0001	0.00197766
gene4755	sdz-18	SKN-1 Dependent Zygotic transcript	NC_003280.10:1704989-1706476	0	4.28467	-	down	5e-05	0.00110206
gene6769	cin-4	DNA topoisomerase 2	NC_003280.10:7038471-7041098	6.80253	18.8096	-1.46733	down	0.00875	0.0471787
gene4132	ptr-23	PaTched Related family	NC_003279.8:14909276-14912772	75.2045	19.6638	1.93528	up	0.0003	0.00471148
gene43995	H29C22.1	Uncharacterized protein	NC_003284.9:9310695-9311312	26.639	679.515	-4.6729	down	5e-05	0.00110206
gene9077	cpg-7	Chondroitin proteoglycan 7	NC_003280.10:14108200-14109217	2581.62	219.523	3.55583	up	5e-05	0.00110206
gene18756	fem-3	Sex-determination protein fem-3	NC_003282.8:9105201-9107344	23.4416	70.4676	-1.58789	down	0.005	0.0333999
gene1695	C48B6.9	Uncharacterized protein	NC_003279.8:6924419-6925459	3.36661	26.3193	-2.96675	down	0.00515	0.0340992
gene2541	hsr-9	Protein hsr-9	NC_003279.8:9626274-9630358	63.3203	148.514	-1.22986	down	0.00515	0.0340992
gene19761	F40F11.3	Uncharacterized protein	NC_003282.8:11592350-11594003	317.16	955.587	-1.59118	down	0.00235	0.0203769
gene33968	T22F3.11	Uncharacterized protein	NC_003283.11:3612457-3614515	226.012	14.7973	3.93299	up	5e-05	0.00110206
gene18688	D1046.2	Uncharacterized protein	NC_003282.8:8924567-8926059	30.0982	92.5584	-1.62069	down	0.00205	0.018779
gene4855	ZK250.13	Uncharacterized protein	NC_003280.10:1937134-1939744	10.3853	1.57136	2.72447	up	0.00785	0.0445004
gene5818	rig-6	Contactin rig-6	NC_003280.10:4798275-4812086	41.876	14.4883	1.53124	up	0.00215	0.0194369
gene1653	pqn-20	Prion-like-(Q/N-rich)-domain-bearing protein	NC_003279.8:6791024-6797328	13.0223	46.1153	-1.82426	down	0.00015	0.0027619
gene1390	ZK484.6	Uncharacterized protein	NC_003279.8:6090305-6090857	36.0287	3.31086	3.44387	up	0.00935	0.0493843
gene650	pqn-72	Prion-like-(Q/N-rich)-domain-bearing protein	NC_003279.8:3269572-3280476	22.9447	5.44967	2.07392	up	0.00735	0.0426146
gene12158	tlk-1	Tousled-Like Kinase	NC_003281.10:9699993-9709871	40.806	99.6897	-1.28866	down	0.00125	0.0133406
gene35309	F25E5.7	Uncharacterized protein	NC_003283.11:7440119-7441483	0	2.33154	-	down	5e-05	0.00110206
gene12555	col-92	COLlagen	NC_003281.10:10982199-10983226	418.213	35.1629	3.57211	up	5e-05	0.00110206
gene41308	vha-15	Probable V-type proton ATPase subunit H 2	NC_003284.9:2237912-2239903	295.701	127.556	1.21301	up	0.00465	0.0317539
gene13356	col-103	COLlagen	NC_003282.8:762452-763664	333.202	106.037	1.65183	up	0.00015	0.0027619
gene2621	zig-1	2 (Zwei) IG domain protein	NC_003279.8:9847406-9849861	73.8905	23.2222	1.66988	up	0.00575	0.0366781
gene40294	Y43F8B.3	Uncharacterized protein	NC_003283.11:19503111-19519726	13.3059	1.13233	3.55471	up	0.00035	0.00529575
gene38985	F14H3.6	Uncharacterized protein	NC_003283.11:16057608-16058879	57.9421	430.892	-2.89464	down	5e-05	0.00110206
gene18434	clec-51	C-type LECtin	NC_003282.8:8162022-8163776	60.4542	11.3315	2.41551	up	0.0046	0.0315165
gene14253	lgc-22	Ligand-Gated ion Channel	NC_003282.8:4301308-4304320	115.239	31.4815	1.87205	up	0.00015	0.0027619
gene3499	sygl-1	Uncharacterized protein	NC_003279.8:12484216-12486157	52.3283	190.165	-1.86159	down	0.00155	0.0155028
gene35536	oma-2	Uncharacterized protein	NC_003283.11:8029508-8030920	89.2456	352.643	-1.98235	down	5e-05	0.00110206
gene1237	klp-15	Kinesin-like protein	NC_003279.8:5577192-5579181	46.0041	173.069	-1.91151	down	5e-05	0.00110206
gene41843	F35A5.5	Uncharacterized protein	NC_003284.9:3793911-3795369	8.0007	0	-	up	5e-05	0.00110206
gene8766	snf-5	Transporter	NC_003280.10:12862013-12865675	57.1826	16.8223	1.7652	up	0.00105	0.0117915
gene42185	K02G10.5	Solute carrier organic anion transporter family member	NC_003284.9:4688007-4691316	18.031	1.33372	3.75695	up	0.00085	0.0100071
gene4530	K02E7.5	-	NC_003280.10:1062023-1063208	0	3.58866	-	down	5e-05	0.00110206
gene18659	T11B7.1	Uncharacterized protein	NC_003282.8:8840724-8842572	1.97327	26.3237	-3.7377	down	0.0005	0.00687417
gene33793	C36C5.15	Uncharacterized protein	NC_003283.11:3167967-3168750	1.68689	0	-	up	0.00025	0.00406508
gene2221	imp-1	IntraMembrane Protease (IMPAS) family	NC_003279.8:8752248-8755361	73.3833	184.398	-1.3293	down	0.0017	0.0164851
gene2115	F10D11.2	Uncharacterized protein	NC_003279.8:8436069-8438586	27.1641	80.9798	-1.57586	down	0.002	0.0184435
gene35060	col-141	COLlagen	NC_003283.11:6829703-6830693	14.5723	1.69559	3.10337	up	0.00155	0.0155028
gene11165	F37A4.4	Ankyrin repeat-containing protein F37A4.4	NC_003281.10:6713704-6717985	16.6163	4.85404	1.77534	up	0.00585	0.037059
gene38317	hda-1	Histone deacetylase 1	NC_003283.11:14525407-14526977	66.3754	149.66	-1.17297	down	0.00555	0.0357885
gene1127	sem-2	Uncharacterized protein	NC_003279.8:5205308-5208121	35.4179	10.4466	1.76144	up	0.00375	0.0274906
gene7181	T05C12.4	Uncharacterized protein	NC_003280.10:8177577-8180368	7.26032	0.621623	3.54592	up	0.00325	0.0251037
gene8421	F13D12.6	Uncharacterized serine carboxypeptidase F13S12.6	NC_003280.10:11739520-11742747	255.528	85.516	1.57922	up	0.0007	0.00881148
gene12609	Y47D3A.34	Uncharacterized protein	NC_003281.10:11232466-11234861	1.22832	0	-	up	5e-05	0.00110206
gene5833	fbxb-88	F-box B protein	NC_003280.10:4826521-4827788	1.00967	11.3362	-3.48899	down	0.0072	0.0420097
gene41009	H42K12.3	Uncharacterized protein	NC_003284.9:1311620-1316528	104.826	4.38367	4.57972	up	5e-05	0.00110206
gene811	F28H1.1	Uncharacterized protein	NC_003279.8:3995736-3996402	8.13862	47.4387	-2.54321	down	0.0025	0.0211243
gene6701	dnj-5	DnaJ homolog dnj-5	NC_003280.10:6853883-6858272	80.3934	207.371	-1.36707	down	0.0014	0.0144568
gene14122	clec-67	C-type LECtin	NC_003282.8:3922194-3924423	67.5119	1.91181	5.14213	up	5e-05	0.00110206
gene18312	T14A8.2	Uncharacterized protein	NC_003282.8:7821762-7822700	147.085	12.2804	3.58222	up	0.00055	0.00740175
gene10181	hmit-1.3	H(+) MyoInositol coTransporter	NC_003281.10:3511056-3516617	84.2059	27.0145	1.64019	up	0.00145	0.014816
gene8949	mig-14	Protein wntless homolog	NC_003280.10:13741751-13749807	18.6825	51.5311	-1.46375	down	0.00725	0.0421973
gene36957	col-154	COLlagen	NC_003283.11:11385376-11386343	356.985	10.1012	5.14326	up	5e-05	0.00110206
gene34401	Y58A7A.3	Uncharacterized protein	NC_003283.11:5077923-5080824	5.09695	16.1491	-1.66375	down	0.00475	0.0321057
gene19983	col-129	COLlagen	NC_003282.8:12108771-12110245	1591.35	555.211	1.51914	up	0.00535	0.0349206
gene1853	col-62	COLlagen	NC_003279.8:7403340-7404352	186.638	16.5961	3.49133	up	5e-05	0.00110206
gene5849	col-73	COLlagen	NC_003280.10:4872216-4873126	2715.77	54.1702	5.64772	up	5e-05	0.00110206
gene11953	cls-2	Protein CLASP-2	NC_003281.10:9055051-9058626	18.1718	42.4876	-1.22534	down	0.0051	0.0339174
gene7766	ZK938.1	Serine/threonine-protein phosphatase	NC_003280.10:9829491-9830696	112.429	37.0484	1.60153	up	0.0018	0.0171731
gene32857	nas-6	Zinc metalloproteinase nas-6	NC_003282.8:17486981-17490497	12.706	1.36246	3.22123	up	0.0081	0.0455278
[truncated: 1,153 more rows]
