# Supplementary material for: C. elegans monitor energy status to trigger innate immune responses via AMPK pathway against bacterial pathogens
Source: Research Square preprint supplement (doi:10.21203/rs.3.rs-590514/v1), 2021-06-10
Supplement: Supplementary file 5 [file aaa50091a33e348b255a34bf.xlsx]

## Sheet: Sheet1
Pathway	Sample1 (555)	Sample2 (5427)	Pvalue	Qvalue	Pathway ID	Genes	KOs	up_number	up_genes	down_number	down_genes
DNA replication	20	32	7.89845e-13	1.57969e-10	ko03030	gene8518;gene20340;gene3510;gene34194;gene38352;gene13496;gene1014;gene4147;gene11580;gene38497;gene19747;gene12193;gene10379;gene11255;gene12599;gene404;gene18626;gene6986;gene686;gene12366	K02540+K10756+K02685+K02210+K10754+K10755+K10739+K02324+K02541+K02328+K02542+K02209+K02320+K02212+K10744+K07466+K04799+K02321	20	gene8518;gene20340;gene3510;gene34194;gene38352;gene13496;gene1014;gene4147;gene11580;gene38497;gene19747;gene12193;gene10379;gene11255;gene12599;gene404;gene18626;gene6986;gene686;gene12366	0
Metabolic pathways	118	641	1.21629e-11	1.01929e-09	ko01100	gene3510;gene44861;gene7410;gene35748;gene45841;gene19229;gene43708;gene37606;gene4147;gene41605;gene2665;gene19747;gene9032;gene42797;gene35538;gene15358;gene3846;gene18861;gene8625;gene14033;gene13113;gene11916;gene41996;gene7217;gene20032;gene37775;gene36533;gene34311;gene42109;gene13686;gene6347;gene7881;gene5702;gene10407;gene43792;gene3505;gene44772;gene40903;gene46147;gene32753;gene10693;g…	K02685+K00789+K00830+K11517+K00815+K13524+K00234+K03331+K02324+K00134+K13499+K02328+K00011+K01790+K03847+K01201+K04710+K14677+K08764+K01254+K01623+K01493+K02147+K01593+K00472+K01648+K01495+K01939+K02127+K02148+K00281+K01587+K14156+K01953+K12348+K01800+K11992+K03935+K01915+K00128+K13403+K01044+K05350+K13953+K00249+K01634+K05546+K00602+K00826+K00149+K02320+K01754+K00273+K01710+K01187+K00022+K00820+…	31	gene3510;gene4147;gene2665;gene19747;gene35538;gene18861;gene11916;gene7217;gene37775;gene34311;gene7881;gene10407;gene32753;gene12599;gene19692;gene7950;gene19268;gene41061;gene12003;gene8378;gene2520;gene2212;gene92;gene10328;gene4553;gene19010;gene1320;gene7934;gene14233;gene12366;gene1112	87	gene44861;gene7410;gene35748;gene45841;gene19229;gene43708;gene37606;gene41605;gene9032;gene42797;gene15358;gene3846;gene8625;gene14033;gene13113;gene41996;gene20032;gene36533;gene42109;gene13686;gene6347;gene5702;gene43792;gene3505;gene44772;gene40903;gene46147;gene10693;gene43507;gene33225;gene18276;gene37220;gene6236;gene13255;gene4938;gene40821;gene18333;gene40680;gene11408;gene7214;gene13757…
Cell cycle	31	81	1.52893e-11	1.01929e-09	ko04110	gene8518;gene677;gene7733;gene28871;gene34194;gene8798;gene38497;gene12621;gene5571;gene12174;gene12183;gene12472;gene12193;gene1327;gene10379;gene13760;gene34223;gene11604;gene32495;gene10236;gene404;gene8942;gene38317;gene10782;gene34224;gene19522;gene32483;gene38667;gene10492;gene33998;gene45277	K02540+K02365+K06633+K03094+K02210+K10151+K02541+K06669+K02087+K04498+K02603+K02542+K02214+K02209+K02537+K06631+K06628+K02212+K02180+K06067+K03875+K05868+K03358+K02216	31	gene8518;gene677;gene7733;gene28871;gene34194;gene8798;gene38497;gene12621;gene5571;gene12174;gene12183;gene12472;gene12193;gene1327;gene10379;gene13760;gene34223;gene11604;gene32495;gene10236;gene404;gene8942;gene38317;gene10782;gene34224;gene19522;gene32483;gene38667;gene10492;gene33998;gene45277	0
Lysosome	23	78	1.64685e-06	8.23426e-05	ko04142	gene32936;gene37266;gene33171;gene5453;gene37692;gene15358;gene1386;gene37851;gene3505;gene34971;gene215;gene4938;gene41308;gene8421;gene33172;gene11148;gene45830;gene18480;gene32850;gene37857;gene42204;gene38622;gene42110	K01052+K01363+K12396+K01201+K05656+K12348+K12399+K02144+K13289+K02154+K08568+K12311+K12385	4	gene5453;gene215;gene38622;gene42110	19	gene32936;gene37266;gene33171;gene37692;gene15358;gene1386;gene37851;gene3505;gene34971;gene4938;gene41308;gene8421;gene33172;gene11148;gene45830;gene18480;gene32850;gene37857;gene42204
Mismatch repair	9	17	1.31424e-05	0.000525698	ko03430	gene20340;gene38352;gene13496;gene1014;gene11580;gene19747;gene11255;gene6986;gene13099	K10756+K10754+K10755+K10739+K02328+K07466+K08734	9	gene20340;gene38352;gene13496;gene1014;gene11580;gene19747;gene11255;gene6986;gene13099	0
Drug metabolism - cytochrome P450	13	36	2.91745e-05	0.000972484	ko00982	gene44142;gene33572;gene19401;gene12482;gene37220;gene5851;gene19397;gene40838;gene34545;gene8116;gene10471;gene37933;gene11553	K00799+K00485+K13953+K00699	0		13	gene44142;gene33572;gene19401;gene12482;gene37220;gene5851;gene19397;gene40838;gene34545;gene8116;gene10471;gene37933;gene11553
Alanine, aspartate and glutamate metabolism	11	30	0.000103051	0.00294433	ko00250	gene7410;gene19229;gene34311;gene43792;gene32753;gene19692;gene35305;gene8378;gene19010;gene35728;gene46506	K00830+K13524+K01939+K01953+K01915+K00820+K00272+K14454	5	gene34311;gene32753;gene19692;gene8378;gene19010	6	gene7410;gene19229;gene43792;gene35305;gene35728;gene46506
Arginine and proline metabolism	11	31	0.000145201	0.00363003	ko00330	gene18861;gene20032;gene32753;gene10693;gene546;gene11408;gene13757;gene19010;gene12639;gene44932;gene46506	K14677+K00472+K01915+K00128+K00934+K00149+K00273+K00286+K14454	3	gene18861;gene32753;gene19010	8	gene20032;gene10693;gene546;gene11408;gene13757;gene12639;gene44932;gene46506
alpha-Linolenic acid metabolism	5	7	0.000193743	0.00430539	ko00592	gene6236;gene46236;gene7934;gene3635;gene3633	K00249+K00232+K01047	1	gene7934	4	gene6236;gene46236;gene3635;gene3633
Propanoate metabolism	10	29	0.000381318	0.00762636	ko00640	gene19229;gene10693;gene6236;gene11408;gene46236;gene4553;gene12177;gene1890;gene3635;gene3633	K13524+K00128+K00249+K00149+K00232+K11262+K07511+K05606	1	gene4553	9	gene19229;gene10693;gene6236;gene11408;gene46236;gene12177;gene1890;gene3635;gene3633
Steroid biosynthesis	4	5	0.000497576	0.00851781	ko00100	gene32936;gene37692;gene46279;gene41429	K01052+K00637+K09828	0		4	gene32936;gene37692;gene46279;gene41429
Oocyte meiosis	17	70	0.000511069	0.00851781	ko04114	gene677;gene7733;gene28871;gene12621;gene5571;gene12174;gene2160;gene13760;gene34223;gene11604;gene32495;gene34224;gene19522;gene32483;gene38667;gene10492;gene45277	K02365+K06633+K03094+K06669+K02087+K04373+K02537+K06631+K05868+K03358	17	gene677;gene7733;gene28871;gene12621;gene5571;gene12174;gene2160;gene13760;gene34223;gene11604;gene32495;gene34224;gene19522;gene32483;gene38667;gene10492;gene45277	0
Fatty acid metabolism	12	42	0.000721581	0.0111013	ko00071	gene10693;gene37220;gene6236;gene11408;gene19254;gene8748;gene33237;gene46236;gene92;gene12177;gene3635;gene3633	K00128+K13953+K00249+K00149+K00022+K08765+K00232+K01897+K07511	2	gene8748;gene92	10	gene10693;gene37220;gene6236;gene11408;gene19254;gene33237;gene46236;gene12177;gene3635;gene3633
Valine, leucine and isoleucine degradation	12	43	0.00090985	0.0113155	ko00280	gene19229;gene10693;gene6236;gene40680;gene11408;gene19254;gene33237;gene46236;gene12177;gene1890;gene3635;gene3633	K13524+K00128+K00249+K00826+K00149+K00022+K00232+K07511+K05606	0		12	gene19229;gene10693;gene6236;gene40680;gene11408;gene19254;gene33237;gene46236;gene12177;gene1890;gene3635;gene3633
Metabolism of xenobiotics by cytochrome P450	10	32	0.000925501	0.0113155	ko00980	gene44142;gene33572;gene34922;gene37220;gene5851;gene40838;gene34545;gene8116;gene10471;gene11553	K00799+K01253+K13953+K00699	0		10	gene44142;gene33572;gene34922;gene37220;gene5851;gene40838;gene34545;gene8116;gene10471;gene11553
PPAR signaling pathway	10	32	0.000925501	0.0113155	ko03320	gene8625;gene20104;gene6236;gene8748;gene43857;gene9362;gene46236;gene92;gene3635;gene3633	K08764+K08745+K00249+K08765+K01596+K00232+K01897	2	gene8748;gene92	8	gene8625;gene20104;gene6236;gene43857;gene9362;gene46236;gene3635;gene3633
beta-Alanine metabolism	8	22	0.000990459	0.0113155	ko00410	gene19229;gene10693;gene6236;gene11408;gene46236;gene12177;gene3635;gene3633	K13524+K00128+K00249+K00149+K00232+K07511	0		8	gene19229;gene10693;gene6236;gene11408;gene46236;gene12177;gene3635;gene3633
Steroid hormone biosynthesis	6	13	0.00101839	0.0113155	ko00140	gene36420;gene40838;gene41064;gene34545;gene10471;gene11064	K12345+K00699+K13370+K10251	1	gene36420	5	gene40838;gene41064;gene34545;gene10471;gene11064
Nucleotide excision repair	10	33	0.00120862	0.0127223	ko03420	gene20340;gene38352;gene13496;gene1014;gene4147;gene11580;gene19747;gene11255;gene6986;gene46242	K10756+K10754+K10755+K10739+K02324+K02328+K07466+K10841	10	gene20340;gene38352;gene13496;gene1014;gene4147;gene11580;gene19747;gene11255;gene6986;gene46242	0
Renin-angiotensin system	4	6	0.00137182	0.0137182	ko04614	gene42306;gene8421;gene11148;gene45830	K01283+K13289	0		4	gene42306;gene8421;gene11148;gene45830
p53 signaling pathway	7	19	0.00189231	0.018022	ko04115	gene8798;gene12174;gene14062;gene10328;gene19522;gene38667;gene33998	K10151+K02087+K04506+K10808+K05868+K02216	7	gene8798;gene12174;gene14062;gene10328;gene19522;gene38667;gene33998	0
Herpes simplex infection	15	66	0.00220525	0.0200477	ko05168	gene28871;gene5571;gene12174;gene12183;gene44658;gene34223;gene32495;gene296;gene10782;gene28453;gene34224;gene14233;gene32483;gene18785;gene45277	K03094+K02087+K04498+K08860+K02207+K03875+K04427+K03006+K12881	14	gene28871;gene5571;gene12174;gene12183;gene44658;gene34223;gene32495;gene296;gene10782;gene34224;gene14233;gene32483;gene18785;gene45277	1	gene28453
Antigen processing and presentation	7	21	0.00364197	0.0304181	ko04612	gene37266;gene33171;gene37851;gene34971;gene33172;gene2394;gene38622	K01363+K03283	2	gene2394;gene38622	5	gene37266;gene33171;gene37851;gene34971;gene33172
HTLV-I infection	16	76	0.00365017	0.0304181	ko05166	gene19137;gene4147;gene8798;gene19747;gene12183;gene8403;gene35456;gene13760;gene35658;gene8942;gene18541;gene19522;gene19001;gene38667;gene10492;gene33998	K05863+K02324+K10151+K02328+K04498+K08874+K14290+K02537+K00408+K02180+K05868+K03358+K02216	14	gene19137;gene4147;gene8798;gene19747;gene12183;gene8403;gene35456;gene13760;gene35658;gene8942;gene19522;gene38667;gene10492;gene33998	2	gene18541;gene19001
Peroxisome	14	63	0.0038123	0.0304984	ko04146	gene7410;gene35748;gene19782;gene46574;gene8625;gene40903;gene6236;gene13757;gene46280;gene35305;gene46236;gene92;gene3635;gene3633	K00830+K11517+K06664+K04564+K08764+K11992+K00249+K00273+K00624+K00272+K00232+K01897	1	gene92	13	gene7410;gene35748;gene19782;gene46574;gene8625;gene40903;gene6236;gene13757;gene46280;gene35305;gene46236;gene3635;gene3633
One carbon pool by folate	5	12	0.00472071	0.0348524	ko00670	gene43507;gene18333;gene42950;gene43506;gene1112	K13403+K00602+K11787+K00288+K00560	1	gene1112	4	gene43507;gene18333;gene42950;gene43506
Ubiquitin mediated proteolysis	16	78	0.00478125	0.0348524	ko04120	gene28871;gene11280;gene5571;gene40885;gene2349;gene2249;gene34223;gene32495;gene14062;gene296;gene10782;gene34224;gene14373;gene32483;gene10492;gene45277	K03094+K04552+K04707+K03876+K10593+K04506+K02207+K03875+K10577+K03358	16	gene28871;gene11280;gene5571;gene40885;gene2349;gene2249;gene34223;gene32495;gene14062;gene296;gene10782;gene34224;gene14373;gene32483;gene10492;gene45277	0
Circadian rhythm - mammal	7	22	0.00487934	0.0348524	ko04710	gene28871;gene5571;gene34223;gene32495;gene34224;gene32483;gene45277	K03094	7	gene28871;gene5571;gene34223;gene32495;gene34224;gene32483;gene45277	0
TGF-beta signaling pathway	9	34	0.00578453	0.0395098	ko04350	gene28871;gene5571;gene12183;gene34223;gene32495;gene34224;gene40805;gene32483;gene45277	K03094+K04498+K04688	9	gene28871;gene5571;gene12183;gene34223;gene32495;gene34224;gene40805;gene32483;gene45277	0
Pyrimidine metabolism	14	66	0.00592647	0.0395098	ko00240	gene3510;gene4147;gene19747;gene43312;gene11916;gene12599;gene19268;gene12003;gene2520;gene2212;gene10328;gene14233;gene12366;gene1112	K02685+K02324+K02328+K12304+K01493+K02320+K00857+K10807+K01520+K03011+K10808+K03006+K02321+K00560	13	gene3510;gene4147;gene19747;gene11916;gene12599;gene19268;gene12003;gene2520;gene2212;gene10328;gene14233;gene12366;gene1112	1	gene43312
Tryptophan metabolism	8	29	0.00698596	0.042763	ko00380	gene7217;gene10693;gene11408;gene19254;gene33237;gene12177;gene42723;gene10936	K01593+K00128+K00149+K00022+K07511+K01556+K00453	1	gene7217	7	gene10693;gene11408;gene19254;gene33237;gene12177;gene42723;gene10936
Fat digestion and absorption	5	13	0.00703466	0.042763	ko04975	gene34921;gene13243;gene20104;gene43857;gene7934	K14457+K14463+K08745+K01047	2	gene34921;gene7934	3	gene13243;gene20104;gene43857
Pentose and glucuronate interconversions	6	18	0.0070559	0.042763	ko00040	gene37606;gene9032;gene10693;gene40838;gene34545;gene10471	K03331+K00011+K00128+K00699	0		6	gene37606;gene9032;gene10693;gene40838;gene34545;gene10471
Tyrosine metabolism	7	24	0.00826695	0.0486291	ko00350	gene45841;gene7217;gene44772;gene37220;gene2322;gene46506;gene12443	K00815+K01593+K01800+K13953+K00451+K14454+K00457	1	gene7217	6	gene45841;gene44772;gene37220;gene2322;gene46506;gene12443
Polyketide sugar unit biosynthesis	2	2	0.0104415	0.0596658	ko00523	gene42797;gene41262	K01790+K01710	0		2	gene42797;gene41262
Amino sugar and nucleotide sugar metabolism	8	32	0.0130227	0.0708425	ko00520	gene4242;gene1882;gene41722;gene19692;gene18619;gene8378;gene18710;gene35228	K00698+K01183+K00820+K01836+K01711+K01809	5	gene1882;gene41722;gene19692;gene18619;gene8378	3	gene4242;gene18710;gene35228
Arachidonic acid metabolism	4	10	0.0137438	0.0708425	ko00590	gene44053;gene43413;gene14033;gene7934	K00432+K01254+K01047	1	gene7934	3	gene44053;gene43413;gene14033
Ascorbate and aldarate metabolism	5	15	0.0138143	0.0708425	ko00053	gene10693;gene11408;gene40838;gene34545;gene10471	K00128+K00149+K00699	0		5	gene10693;gene11408;gene40838;gene34545;gene10471
Other glycan degradation	5	15	0.0138143	0.0708425	ko00511	gene15358;gene34594;gene4938;gene32850;gene42204	K01201+K14459+K12311	0		5	gene15358;gene34594;gene4938;gene32850;gene42204
Glycolysis / Gluconeogenesis	9	39	0.0147403	0.071904	ko00010	gene41605;gene13113;gene7881;gene10693;gene37220;gene11408;gene41606;gene7950;gene9362	K00134+K01623+K00128+K13953+K00149+K01596	2	gene7881;gene7950	7	gene41605;gene13113;gene10693;gene37220;gene11408;gene41606;gene9362
Glutathione metabolism	9	39	0.0147403	0.071904	ko00480	gene44053;gene44142;gene33572;gene43413;gene5851;gene12003;gene8116;gene10328;gene11553	K00432+K00799+K10807+K10808	2	gene12003;gene10328	7	gene44053;gene44142;gene33572;gene43413;gene5851;gene8116;gene11553
Biosynthesis of unsaturated fatty acids	5	16	0.0184411	0.0878147	ko01040	gene6236;gene46236;gene3635;gene3633;gene11064	K00249+K00232+K10251	0		5	gene6236;gene46236;gene3635;gene3633;gene11064
Wnt signaling pathway	12	62	0.0212613	0.0988896	ko04310	gene28871;gene8798;gene5571;gene12183;gene34223;gene35658;gene32495;gene14062;gene28453;gene34224;gene32483;gene45277	K03094+K10151+K04498+K00408+K04506+K04427	11	gene28871;gene8798;gene5571;gene12183;gene34223;gene35658;gene32495;gene14062;gene34224;gene32483;gene45277	1	gene28453
Bile secretion	7	29	0.0238183	0.105859	ko04976	gene34922;gene40838;gene1332;gene45489;gene20194;gene34545;gene10471	K01253+K00699+K05658+K01540	0		7	gene34922;gene40838;gene1332;gene45489;gene20194;gene34545;gene10471
Cysteine and methionine metabolism	7	29	0.0238183	0.105859	ko00270	gene44861;gene45841;gene6777;gene44173;gene46506;gene5845;gene17244	K00789+K00815+K01758+K01738+K14454+K01011	0		7	gene44861;gene45841;gene6777;gene44173;gene46506;gene5845;gene17244
Influenza A	10	50	0.027543	0.119752	ko05164	gene19137;gene43416;gene12183;gene44658;gene35456;gene43273;gene2394;gene19979;gene18541;gene19001	K05863+K04433+K04498+K08860+K14290+K04431+K03283+K14404	8	gene19137;gene43416;gene12183;gene44658;gene35456;gene43273;gene2394;gene19979	2	gene18541;gene19001
Pyruvate metabolism	6	24	0.0301835	0.127056	ko00620	gene9032;gene36679;gene10693;gene11408;gene9362;gene4553	K00011+K00102+K00128+K00149+K01596+K11262	1	gene4553	5	gene9032;gene36679;gene10693;gene11408;gene9362
Notch signaling pathway	5	18	0.0304935	0.127056	ko04330	gene1856;gene12183;gene2372;gene38317;gene40689	K06060+K04498+K06172+K06067+K06057	4	gene12183;gene2372;gene38317;gene40689	1	gene1856
Glycine, serine and threonine metabolism	6	25	0.0364013	0.14275	ko00260	gene7410;gene19425;gene6347;gene7214;gene13757;gene6777	K00830+K00639+K00281+K01754+K00273+K01758	0		6	gene7410;gene19425;gene6347;gene7214;gene13757;gene6777
Glyoxylate and dicarboxylate metabolism	6	25	0.0364013	0.14275	ko00630	gene45732;gene7410;gene35748;gene32753;gene19010;gene1890	K02437+K00830+K11517+K01915+K05606	2	gene32753;gene19010	4	gene45732;gene7410;gene35748;gene1890
Rheumatoid arthritis	6	25	0.0364013	0.14275	ko05323	gene41996;gene13686;gene9395;gene41308;gene18480;gene17752	K02147+K02148+K05096+K02144+K02154+K02150	1	gene9395	5	gene41996;gene13686;gene41308;gene18480;gene17752
Purine metabolism	16	98	0.0389595	0.149844	ko00230	gene3510;gene4147;gene19747;gene43312;gene34311;gene5702;gene18333;gene12599;gene12003;gene42950;gene19380;gene2212;gene10328;gene4138;gene14233;gene12366	K02685+K02324+K02328+K12304+K01939+K01587+K00602+K02320+K10807+K11787+K07127+K03011+K10808+K01139+K03006+K02321	10	gene3510;gene4147;gene19747;gene34311;gene12599;gene12003;gene2212;gene10328;gene14233;gene12366	6	gene43312;gene5702;gene18333;gene42950;gene19380;gene4138
Starch and sucrose metabolism	6	26	0.0433836	0.163464	ko00500	gene18276;gene18514;gene37150;gene40838;gene34545;gene10471	K05350+K01187+K01194+K00699	0		6	gene18276;gene18514;gene37150;gene40838;gene34545;gene10471
Epstein-Barr virus infection	15	92	0.0451353	0.163464	ko05169	gene11164;gene10031;gene12174;gene43416;gene12183;gene44658;gene35456;gene43273;gene38317;gene10782;gene28453;gene2394;gene2212;gene14233;gene1477	K03030+K03066+K02087+K04433+K04498+K08860+K14290+K04431+K06067+K03875+K04427+K03283+K03011+K03006+K03062	12	gene10031;gene12174;gene43416;gene12183;gene44658;gene35456;gene43273;gene38317;gene10782;gene2394;gene2212;gene14233	3	gene11164;gene28453;gene1477
Lysine degradation	7	33	0.0457175	0.163464	ko00310	gene13132;gene10693;gene11408;gene19254;gene33237;gene11103;gene12177	K09188+K00128+K00149+K00022+K11428+K07511	2	gene13132;gene11103	5	gene10693;gene11408;gene19254;gene33237;gene12177
Pathways in cancer	16	100	0.0457699	0.163464	ko05200	gene13557;gene44142;gene33572;gene5161;gene37207;gene7093;gene40885;gene12183;gene35658;gene5851;gene44114;gene38317;gene10782;gene13099;gene8116;gene11553	K04438+K00799+K06225+K05691+K04707+K04498+K00408+K09288+K06067+K03875+K08734	10	gene13557;gene37207;gene7093;gene40885;gene12183;gene35658;gene44114;gene38317;gene10782;gene13099	6	gene44142;gene33572;gene5161;gene5851;gene8116;gene11553
Sphingolipid metabolism	6	27	0.0511497	0.176378	ko00600	gene15358;gene3846;gene3505;gene13255;gene4938;gene32850	K01201+K04710+K12348+K01634	0		6	gene15358;gene3846;gene3505;gene13255;gene4938;gene32850
Drug metabolism - other enzymes	6	27	0.0511497	0.176378	ko00983	gene33225;gene19268;gene40838;gene34868;gene34545;gene10471	K01044+K00857+K00699+K03927	1	gene19268	5	gene33225;gene40838;gene34868;gene34545;gene10471
Primary bile acid biosynthesis	2	4	0.0544591	0.184607	ko00120	gene8625;gene40903	K08764+K11992	0		2	gene8625;gene40903
Other types of O-glycan biosynthesis	4	15	0.0592593	0.191159	ko00514	gene41619;gene40838;gene34545;gene10471	K03691+K00699	0		4	gene41619;gene40838;gene34545;gene10471
Phenylalanine metabolism	4	15	0.0592593	0.191159	ko00360	gene45841;gene7217;gene46506;gene12443	K00815+K01593+K14454+K00457	1	gene7217	3	gene45841;gene46506;gene12443
Protein digestion and absorption	4	15	0.0592593	0.191159	ko04974	gene40460;gene42874;gene45489;gene11490	K05849+K14206+K01540+K01285	0		4	gene40460;gene42874;gene45489;gene11490
Endocytosis	12	73	0.0650342	0.206458	ko04144	gene3769;gene19026;gene35749;gene6581;gene40885;gene14077;gene9395;gene6044;gene2394;gene425;gene3562;gene10847	K12192+K06278+K12198+K12194+K04707+K12495+K05096+K06069+K03283+K12197+K06093+K04237	12	gene3769;gene19026;gene35749;gene6581;gene40885;gene14077;gene9395;gene6044;gene2394;gene425;gene3562;gene10847	0
Progesterone-mediated oocyte maturation	8	43	0.0667064	0.208458	ko04914	gene7733;gene12174;gene2160;gene13760;gene11604;gene19522;gene38667;gene10492	K06633+K02087+K04373+K02537+K06631+K05868+K03358	8	gene7733;gene12174;gene2160;gene13760;gene11604;gene19522;gene38667;gene10492	0
Fatty acid elongation	4	16	0.0728654	0.224201	ko00062	gene19254;gene33237;gene12177;gene11064	K00022+K07511+K10251	0		4	gene19254;gene33237;gene12177;gene11064
RNA transport	16	108	0.0813844	0.246619	ko03013	gene31895;gene4188;gene10349;gene2078;gene13030;gene35456;gene11689;gene8473;gene10148;gene7803;gene11511;gene32864;gene37156;gene9539;gene14373;gene18785	K13131+K13151+K14324+K14304+K14299+K14290+K13136+K14310+K12172+K14326+K03254+K03259+K14315+K14325+K10577+K12881	16	gene31895;gene4188;gene10349;gene2078;gene13030;gene35456;gene11689;gene8473;gene10148;gene7803;gene11511;gene32864;gene37156;gene9539;gene14373;gene18785	0
Non-homologous end-joining	2	5	0.0847086	0.252862	ko03450	gene10432;gene686	K10885+K04799	2	gene10432;gene686	0
Porphyrin and chlorophyll metabolism	4	17	0.0879061	0.2548	ko00860	gene723;gene40838;gene34545;gene10471	K00522+K00699	0		4	gene723;gene40838;gene34545;gene10471
Collecting duct acid secretion	4	17	0.0879061	0.2548	ko04966	gene41996;gene13686;gene18480;gene17752	K02147+K02148+K02154+K02150	0		4	gene41996;gene13686;gene18480;gene17752
Histidine metabolism	3	11	0.0942547	0.269299	ko00340	gene7217;gene10693;gene11408	K01593+K00128+K00149	1	gene7217	2	gene10693;gene11408
D-Arginine and D-ornithine metabolism	1	1	0.102266	0.284073	ko00472	gene13757	K00273	0		1	gene13757
Insect hormone biosynthesis	1	1	0.102266	0.284073	ko00981	gene36374	K14938	0		1	gene36374
Retinol metabolism	4	18	0.10431	0.28578	ko00830	gene37220;gene40838;gene34545;gene10471	K13953+K00699	0		4	gene37220;gene40838;gene34545;gene10471
Citrate cycle (TCA cycle)	6	33	0.114419	0.309241	ko00020	gene43708;gene37775;gene1710;gene9362;gene41061;gene45628	K00234+K01648+K00030+K01596	2	gene37775;gene41061	4	gene43708;gene1710;gene9362;gene45628
Phenylalanine, tyrosine and tryptophan biosynthesis	2	6	0.118664	0.312274	ko00400	gene45841;gene46506	K00815+K14454	0		2	gene45841;gene46506
Valine, leucine and isoleucine biosynthesis	2	6	0.118664	0.312274	ko00290	gene40680;gene7214	K00826+K01754	0		2	gene40680;gene7214
Tight junction	8	49	0.122057	0.317031	ko04530	gene41608;gene37207;gene46664;gene6044;gene37227;gene3562;gene10847;gene46667	K06114+K05691+K12757+K06069+K06115+K06093+K04237	6	gene41608;gene37207;gene6044;gene37227;gene3562;gene10847	2	gene46664;gene46667
Measles	5	27	0.135214	0.346702	ko05162	gene8798;gene40885;gene44658;gene28453;gene2394	K10151+K04707+K08860+K04427+K03283	4	gene8798;gene40885;gene44658;gene2394	1	gene28453
Jak-STAT signaling pathway	3	13	0.140513	0.351282	ko04630	gene8798;gene40885;gene12183	K10151+K04707+K04498	3	gene8798;gene40885;gene12183	0
Base excision repair	3	13	0.140513	0.351282	ko03410	gene4147;gene19747;gene686	K02324+K02328+K04799	3	gene4147;gene19747;gene686	0
Fructose and mannose metabolism	4	21	0.160766	0.396952	ko00051	gene9032;gene13113;gene18710;gene35228	K00011+K01623+K01711+K01809	0		4	gene9032;gene13113;gene18710;gene35228
Butanoate metabolism	4	22	0.181639	0.437684	ko00650	gene19229;gene19254;gene33237;gene12177	K13524+K00022+K07511	0		4	gene19229;gene19254;gene33237;gene12177
Fanconi anemia pathway	4	22	0.181639	0.437684	ko03460	gene1014;gene11809;gene6986;gene13099	K10739+K03511+K07466+K08734	4	gene1014;gene11809;gene6986;gene13099	0
Homologous recombination	3	15	0.192658	0.446187	ko03440	gene1014;gene19747;gene6986	K10739+K02328+K07466	3	gene1014;gene19747;gene6986	0
Hedgehog signaling pathway	3	15	0.192658	0.446187	ko04340	gene5161;gene7093;gene35658	K06225+K00408	2	gene7093;gene35658	1	gene5161
Arrhythmogenic right ventricular cardiomyopathy (ARVC)	3	15	0.192658	0.446187	ko05412	gene37207;gene40460;gene35093	K05691+K05849+K04962	1	gene37207	2	gene40460;gene35093
Glycosaminoglycan biosynthesis - keratan sulfate	1	2	0.194091	0.446187	ko00533	gene34728	K00717	0		1	gene34728
Prostate cancer	6	39	0.20353	0.462569	ko05215	gene44142;gene33572;gene12183;gene5851;gene8116;gene11553	K00799+K04498	1	gene12183	5	gene44142;gene33572;gene5851;gene8116;gene11553
Transcriptional misregulation in cancer	8	56	0.209085	0.469854	ko05202	gene12068;gene8798;gene43713;gene3984;gene9395;gene38317;gene6021;gene34728	K11253+K10151+K11447+K15616+K05096+K06067+K04459+K00717	7	gene12068;gene8798;gene43713;gene3984;gene9395;gene38317;gene6021	1	gene34728
MAPK signaling pathway	9	65	0.215826	0.479064	ko04010	gene13557;gene43416;gene2160;gene10992;gene43273;gene28453;gene2394;gene6021;gene7934	K04438+K04433+K04373+K04429+K04431+K04427+K03283+K04459+K01047	8	gene13557;gene43416;gene2160;gene10992;gene43273;gene2394;gene6021;gene7934	1	gene28453
ABC transporters	3	16	0.220302	0.479064	ko02010	gene1386;gene1332;gene20194	K05656+K05658	0		3	gene1386;gene1332;gene20194
Epithelial cell signaling in Helicobacter pylori infection	6	40	0.220369	0.479064	ko05120	gene2236;gene41996;gene13686;gene41308;gene18480;gene17752	K06704+K02147+K02148+K02144+K02154+K02150	1	gene2236	5	gene41996;gene13686;gene41308;gene18480;gene17752
Ubiquinone and other terpenoid-quinone biosynthesis	2	9	0.232925	0.500914	ko00130	gene45841;gene12443	K00815+K00457	0		2	gene45841;gene12443
Cardiac muscle contraction	5	33	0.244104	0.519371	ko04260	gene40460;gene35093;gene45995;gene45489;gene44877	K05849+K04962+K00415+K01540	0		5	gene40460;gene35093;gene45995;gene45489;gene44877
Adipocytokine signaling pathway	4	25	0.248765	0.523716	ko04920	gene8748;gene9362;gene92;gene4553	K08765+K01596+K01897+K11262	3	gene8748;gene92;gene4553	1	gene9362
Protein processing in endoplasmic reticulum	15	123	0.273062	0.560698	ko04141	gene28871;gene7808;gene5571;gene4094;gene44658;gene40892;gene34223;gene32495;gene40821;gene34532;gene43273;gene2394;gene34224;gene32483;gene45277	K03094+K14018+K09502+K08860+K13250+K05546+K09503+K04431+K03283	13	gene28871;gene7808;gene5571;gene4094;gene44658;gene34223;gene32495;gene34532;gene43273;gene2394;gene34224;gene32483;gene45277	2	gene40892;gene40821
Fatty acid biosynthesis	1	3	0.276539	0.560698	ko00061	gene4553	K11262	1	gene4553	0
Linoleic acid metabolism	1	3	0.276539	0.560698	ko00591	gene7934	K01047	1	gene7934	0
Basal cell carcinoma	3	18	0.277546	0.560698	ko05217	gene5161;gene7093;gene35658	K06225+K00408	2	gene7093;gene35658	1	gene5161
Huntington's disease	15	125	0.294479	0.588959	ko05016	gene19137;gene44053;gene43708;gene43413;gene46574;gene12183;gene42109;gene46147;gene38317;gene45995;gene44877;gene2212;gene18541;gene14233;gene19001	K05863+K00432+K00234+K04564+K04498+K02127+K03935+K06067+K00415+K03011+K03006	5	gene19137;gene12183;gene38317;gene2212;gene14233	10	gene44053;gene43708;gene43413;gene46574;gene42109;gene46147;gene45995;gene44877;gene18541;gene19001
Calcium signaling pathway	5	36	0.30534	0.595566	ko04020	gene19137;gene40460;gene35093;gene18541;gene19001	K05863+K05849+K04962	1	gene19137	4	gene40460;gene35093;gene18541;gene19001
Galactose metabolism	2	11	0.31231	0.595566	ko00052	gene9032;gene18514	K00011+K01187	0		2	gene9032;gene18514
Regulation of autophagy	2	11	0.31231	0.595566	ko04140	gene8493;gene15961	K08333+K08334	2	gene8493;gene15961	0
Proximal tubule bicarbonate reclamation	2	11	0.31231	0.595566	ko04964	gene9362;gene45489	K01596+K01540	0		2	gene9362;gene45489
Insulin signaling pathway	7	54	0.312672	0.595566	ko04910	gene13557;gene40885;gene6044;gene9362;gene32864;gene40805;gene4553	K04438+K04707+K06069+K01596+K03259+K04688+K11262	6	gene13557;gene40885;gene6044;gene32864;gene40805;gene4553	1	gene9362
Hypertrophic cardiomyopathy (HCM)	3	20	0.335984	0.633931	ko05410	gene42306;gene40460;gene35093	K01283+K05849+K04962	0		3	gene42306;gene40460;gene35093
Cyanoamino acid metabolism	1	4	0.350566	0.655263	ko00460	gene18276	K05350	0		1	gene18276
Toll-like receptor signaling pathway	3	21	0.365187	0.670067	ko04620	gene43416;gene43273;gene28453	K04433+K04431+K04427	2	gene43416;gene43273	1	gene28453
Long-term potentiation	3	21	0.365187	0.670067	ko04720	gene7587;gene12183;gene2160	K06270+K04498+K04373	3	gene7587;gene12183;gene2160	0
Synaptic vesicle cycle	5	40	0.389655	0.703871	ko04721	gene41996;gene13686;gene41308;gene18480;gene17752	K02147+K02148+K02144+K02154+K02150	0		5	gene41996;gene13686;gene41308;gene18480;gene17752
Osteoclast differentiation	3	22	0.394168	0.703871	ko04380	gene43416;gene43273;gene28453	K04433+K04431+K04427	2	gene43416;gene43273	1	gene28453
Chronic myeloid leukemia	3	22	0.394168	0.703871	ko05220	gene13557;gene40885;gene38317	K04438+K04707+K06067	3	gene13557;gene40885;gene38317	0
Vibrio cholerae infection	5	41	0.410766	0.716596	ko05110	gene41996;gene13686;gene41308;gene18480;gene17752	K02147+K02148+K02144+K02154+K02150	0		5	gene41996;gene13686;gene41308;gene18480;gene17752
Toxoplasmosis	4	32	0.416847	0.716596	ko05145	gene43416;gene28453;gene2394;gene7934	K04433+K04427+K03283+K01047	3	gene43416;gene2394;gene7934	1	gene28453
Sulfur metabolism	1	5	0.41703	0.716596	ko00920	gene44173	K01738	0		1	gene44173
Glycerolipid metabolism	3	23	0.422791	0.716596	ko00561	gene9032;gene10693;gene11408	K00011+K00128+K00149	0		3	gene9032;gene10693;gene11408
Fc epsilon RI signaling pathway	3	23	0.422791	0.716596	ko04664	gene43416;gene43273;gene7934	K04433+K04431+K01047	3	gene43416;gene43273;gene7934	0
Mineral absorption	3	23	0.422791	0.716596	ko04978	gene723;gene40460;gene45489	K00522+K05849+K01540	0		3	gene723;gene40460;gene45489
Oxidative phosphorylation	11	99	0.433283	0.728207	ko00190	gene43708;gene41996;gene42109;gene13686;gene46147;gene41308;gene43011;gene45995;gene18480;gene44877;gene17752	K00234+K02147+K02127+K02148+K03935+K02144+K02140+K00415+K02154+K02150	0		11	gene43708;gene41996;gene42109;gene13686;gene46147;gene41308;gene43011;gene45995;gene18480;gene44877;gene17752
Alzheimer's disease	12	109	0.439193	0.731988	ko05010	gene43708;gene41605;gene2236;gene44658;gene42109;gene7881;gene2372;gene46147;gene41606;gene7950;gene45995;gene44877	K00234+K00134+K06704+K08860+K02127+K06172+K03935+K00415	5	gene2236;gene44658;gene7881;gene2372;gene7950	7	gene43708;gene41605;gene42109;gene46147;gene41606;gene45995;gene44877
NF-kappa B signaling pathway	2	15	0.463204	0.736166	ko04064	gene28453;gene14373	K04427+K10577	1	gene14373	1	gene28453
Terpenoid backbone biosynthesis	2	15	0.463204	0.736166	ko00900	gene1046;gene1239	K00587	1	gene1239	1	gene1046
Prion diseases	2	15	0.463204	0.736166	ko05020	gene2394;gene33085	K03283+K09553	2	gene2394;gene33085	0
Adherens junction	4	34	0.464205	0.736166	ko04520	gene37207;gene12183;gene28453;gene10847	K05691+K04498+K04427+K04237	3	gene37207;gene12183;gene10847	1	gene28453
ErbB signaling pathway	4	34	0.464205	0.736166	ko04012	gene13557;gene40885;gene43273;gene40805	K04438+K04707+K04431+K04688	4	gene13557;gene40885;gene43273;gene40805	0
mRNA surveillance pathway	7	63	0.468512	0.736166	ko03015	gene2744;gene10349;gene6663;gene7803;gene19979;gene9539;gene18785	K11583+K14324+K15544+K14326+K14404+K14325+K12881	7	gene2744;gene10349;gene6663;gene7803;gene19979;gene9539;gene18785	0
Riboflavin metabolism	1	6	0.476703	0.736166	ko00740	gene7804	K01078	0		1	gene7804
Cytokine-cytokine receptor interaction	1	6	0.476703	0.736166	ko04060	gene9395	K05096	1	gene9395	0
Glycosaminoglycan biosynthesis - chondroitin sulfate	1	6	0.476703	0.736166	ko00532	gene2665	K13499	1	gene2665	0
mTOR signaling pathway	3	25	0.478508	0.736166	ko04150	gene2160;gene32864;gene40805	K04373+K03259+K04688	3	gene2160;gene32864;gene40805	0
Focal adhesion	7	64	0.485586	0.741353	ko04510	gene13557;gene8798;gene19026;gene7587;gene46664;gene9395;gene46667	K04438+K10151+K06278+K06270+K12757+K05096	5	gene13557;gene8798;gene19026;gene7587;gene9395	2	gene46664;gene46667
Bacterial invasion of epithelial cells	4	36	0.510132	0.771146	ko05100	gene13557;gene19026;gene37207;gene40885	K04438+K06278+K05691+K04707	4	gene13557;gene19026;gene37207;gene40885	0
Spliceosome	11	105	0.514153	0.771146	ko03040	gene19069;gene4333;gene7882;gene18009;gene13936;gene11495;gene12156;gene38964;gene2394;gene44627;gene18785	K12817+K12825+K12866+K12733+K12741+K12848+K12873+K12863+K03283+K12857+K12881	11	gene19069;gene4333;gene7882;gene18009;gene13936;gene11495;gene12156;gene38964;gene2394;gene44627;gene18785	0
Phagosome	6	56	0.516668	0.771146	ko04145	gene41996;gene13686;gene8107;gene41308;gene18480;gene17752	K02147+K02148+K07374+K02144+K02154+K02150	0		6	gene41996;gene13686;gene8107;gene41308;gene18480;gene17752
Amyotrophic lateral sclerosis (ALS)	3	27	0.53158	0.787526	ko05014	gene44053;gene43413;gene43416	K00432+K04433	1	gene43416	2	gene44053;gene43413
Pancreatic secretion	3	28	0.556952	0.819047	ko04972	gene35093;gene45489;gene7934	K04962+K01540+K01047	1	gene7934	2	gene35093;gene45489
Ether lipid metabolism	1	8	0.578377	0.844346	ko00565	gene7934	K01047	1	gene7934	0
Parkinson's disease	9	91	0.594334	0.861353	ko05012	gene19137;gene43708;gene11280;gene42109;gene46147;gene45995;gene44877;gene18541;gene19001	K05863+K00234+K04552+K02127+K03935+K00415	2	gene19137;gene11280	7	gene43708;gene42109;gene46147;gene45995;gene44877;gene18541;gene19001
Dilated cardiomyopathy	2	20	0.621518	0.868848	ko05414	gene40460;gene35093	K05849+K04962	0		2	gene40460;gene35093
Amphetamine addiction	2	20	0.621518	0.868848	ko05031	gene7217;gene38317	K01593+K06067	2	gene7217;gene38317	0
Type II diabetes mellitus	1	9	0.621559	0.868848	ko04930	gene6044	K06069	1	gene6044	0
GnRH signaling pathway	3	31	0.627885	0.868848	ko04912	gene43416;gene43273;gene7934	K04433+K04431+K01047	3	gene43416;gene43273;gene7934	0
Regulation of actin cytoskeleton	6	63	0.635336	0.868848	ko04810	gene40964;gene13557;gene7587;gene3629;gene46664;gene46667	K05759+K04438+K06270+K12757	3	gene13557;gene7587;gene3629	3	gene40964;gene46664;gene46667
Endocrine and other factor-regulated calcium reabsorption	2	21	0.648501	0.868848	ko04961	gene40460;gene45489	K05849+K01540	0		2	gene40460;gene45489
T cell receptor signaling pathway	3	32	0.649717	0.868848	ko04660	gene40885;gene43273;gene28453	K04707+K04431+K04427	2	gene40885;gene43273	1	gene28453
N-Glycan biosynthesis	3	32	0.649717	0.868848	ko00510	gene35538;gene40821;gene34728	K03847+K05546+K00717	1	gene35538	2	gene40821;gene34728
Glycerophospholipid metabolism	4	43	0.654244	0.868848	ko00564	gene11844;gene10407;gene43446;gene7934	K14676+K14156+K00967+K01047	3	gene11844;gene10407;gene7934	1	gene43446
Nicotinate and nicotinamide metabolism	1	10	0.660325	0.868848	ko00760	gene42727	K00323	0		1	gene42727
Folate biosynthesis	1	10	0.660325	0.868848	ko00790	gene36533	K01495	0		1	gene36533
Leishmaniasis	1	10	0.660325	0.868848	ko05140	gene28453	K04427	0		1	gene28453
NOD-like receptor signaling pathway	1	10	0.660325	0.868848	ko04621	gene28453	K04427	0		1	gene28453
Thyroid cancer	1	10	0.660325	0.868848	ko05216	gene44114	K09288	1	gene44114	0
Serotonergic synapse	3	33	0.670621	0.876629	ko04726	gene7217;gene6021;gene7934	K01593+K04459+K01047	3	gene7217;gene6021;gene7934	0
Shigellosis	3	34	0.690597	0.877802	ko05131	gene40964;gene13557;gene3629	K05759+K04438	2	gene13557;gene3629	1	gene40964
Fc gamma R-mediated phagocytosis	3	34	0.690597	0.877802	ko04666	gene13557;gene40805;gene7934	K04438+K04688+K01047	3	gene13557;gene40805;gene7934	0
Glycosylphosphatidylinositol(GPI)-anchor biosynthesis	1	11	0.695126	0.877802	ko00563	gene1320	K05289	1	gene1320	0
Pantothenate and CoA biosynthesis	1	11	0.695126	0.877802	ko00770	gene40680	K00826	0		1	gene40680
Selenocompound metabolism	1	11	0.695126	0.877802	ko00450	gene6777	K01758	0		1	gene6777
Endometrial cancer	2	23	0.697852	0.877802	ko05213	gene37207;gene13099	K05691+K08734	2	gene37207;gene13099	0
RNA polymerase	2	24	0.720299	0.898502	ko03020	gene2212;gene14233	K03011+K03006	2	gene2212;gene14233	0
Sulfur relay system	1	12	0.726368	0.898502	ko04122	gene5845	K01011	0		1	gene5845
Leukocyte transendothelial migration	3	36	0.727787	0.898502	ko04670	gene37207;gene46664;gene46667	K05691+K12757	1	gene37207	2	gene46664;gene46667
GABAergic synapse	3	37	0.745025	0.908932	ko04727	gene19229;gene32753;gene19010	K13524+K01915	2	gene32753;gene19010	1	gene19229
Aldosterone-regulated sodium reabsorption	1	13	0.754413	0.908932	ko04960	gene45489	K01540	0		1	gene45489
Carbohydrate digestion and absorption	1	13	0.754413	0.908932	ko04973	gene45489	K01540	0		1	gene45489
RIG-I-like receptor signaling pathway	1	13	0.754413	0.908932	ko04622	gene28453	K04427	0		1	gene28453
Proteasome	3	38	0.761382	0.911835	ko03050	gene11164;gene10031;gene1477	K03030+K03066+K03062	1	gene10031	2	gene11164;gene1477
Glutamatergic synapse	3	39	0.776879	0.92259	ko04724	gene32753;gene19010;gene7934	K01915+K01047	3	gene32753;gene19010;gene7934	0
Cocaine addiction	1	14	0.779589	0.92259	ko05030	gene7217	K01593	1	gene7217	0
Tuberculosis	3	40	0.791541	0.925779	ko05152	gene12183;gene41308;gene18480	K04498+K02144+K02154	1	gene12183	2	gene41308;gene18480
Neurotrophin signaling pathway	3	40	0.791541	0.925779	ko04722	gene13557;gene2160;gene43273	K04438+K04373+K04431	3	gene13557;gene2160;gene43273	0
Renal cell carcinoma	2	29	0.812365	0.944611	ko05211	gene13557;gene12183	K04438+K04498	2	gene13557;gene12183	0
RNA degradation	3	42	0.818462	0.945372	ko03018	gene8440;gene2344;gene8183	K12617+K03514+K12620	3	gene8440;gene2344;gene8183	0
Acute myeloid leukemia	1	16	0.822473	0.945372	ko05221	gene40805	K04688	1	gene40805	0
Gap junction	2	31	0.840911	0.961041	ko04540	gene12174;gene8107	K02087+K07374	1	gene12174	1	gene8107
Small cell lung cancer	1	18	0.857026	0.968393	ko05222	gene10782	K03875	1	gene10782	0
Basal transcription factors	2	33	0.865466	0.968393	ko03022	gene10858;gene3883	K03123+K03125	2	gene10858;gene3883	0
Vascular smooth muscle contraction	2	33	0.865466	0.968393	ko04270	gene7587;gene7934	K06270+K01047	2	gene7587;gene7934	0
Pentose phosphate pathway	1	19	0.871696	0.968393	ko00030	gene13113	K01623	0		1	gene13113
Chemokine signaling pathway	3	47	0.873112	0.968393	ko04062	gene13557;gene6044;gene10847	K04438+K06069+K04237	3	gene13557;gene6044;gene10847	0
Melanogenesis	2	34	0.876395	0.968393	ko04916	gene12183;gene35658	K04498+K00408	2	gene12183;gene35658	0
Viral myocarditis	1	20	0.884864	0.972378	ko05416	gene19026	K06278	1	gene19026	0
Legionellosis	1	22	0.907289	0.976985	ko05134	gene2394	K03283	1	gene2394	0
Gastric acid secretion	1	23	0.916809	0.976985	ko04971	gene45489	K01540	0		1	gene45489
Salivary secretion	1	23	0.916809	0.976985	ko04970	gene45489	K01540	0		1	gene45489
SNARE interactions in vesicular transport	1	23	0.916809	0.976985	ko04130	gene34584	K08496	1	gene34584	0
Salmonella infection	2	39	0.919729	0.976985	ko05132	gene40964;gene3629	K05759	1	gene3629	1	gene40964
Neuroactive ligand-receptor interaction	1	24	0.925353	0.976985	ko04080	gene10847	K04237	1	gene10847	0
VEGF signaling pathway	1	24	0.925353	0.976985	ko04370	gene7934	K01047	1	gene7934	0
Long-term depression	1	25	0.93302	0.976985	ko04730	gene7934	K01047	1	gene7934	0
Hepatitis C	1	25	0.93302	0.976985	ko05160	gene44658	K08860	1	gene44658	0
Chagas disease (American trypanosomiasis)	1	27	0.946077	0.978439	ko05142	gene42306	K01283	0		1	gene42306
Colorectal cancer	1	27	0.946077	0.978439	ko05210	gene13099	K08734	1	gene13099	0
Axon guidance	1	29	0.956593	0.978439	ko04360	gene5751	K05110	1	gene5751	0
Dopaminergic synapse	2	46	0.95696	0.978439	ko04728	gene2744;gene7217	K11583+K01593	2	gene2744;gene7217	0
Systemic lupus erythematosus	4	76	0.959605	0.978439	ko05322	gene12068;gene14297;gene2677;gene18492	K11253+K11251+K11254	4	gene12068;gene14297;gene2677;gene18492	0
Pathogenic Escherichia coli infection	1	32	0.968654	0.978439	ko05130	gene8107	K07374	0		1	gene8107
Retrograde endocannabinoid signaling	1	32	0.968654	0.978439	ko04723	gene12772	K15528	1	gene12772	0
Alcoholism	6	111	0.976552	0.981459	ko05034	gene12068;gene14297;gene7217;gene38317;gene2677;gene18492	K11253+K11251+K01593+K06067+K11254	6	gene12068;gene14297;gene7217;gene38317;gene2677;gene18492	0
Ribosome biogenesis in eukaryotes	2	61	0.98928	0.98928	ko03008	gene35456;gene12793	K14290+K14570	2	gene35456;gene12793	0
